# Supplementary material for: Metal-free radical cascade cyclization/haloazidation of enynones to access functionalized 1-indanones
Source: Royal Society of Chemistry journal article supplement (doi:10.1039/d4ob01810a), 2024-12-11
Supplement: d4ob01810a1.pdf [file d4ob01810a1.pdf]

## Supporting Information

### **Metal-Free Radical Cascade Cyclization/Haloazidation of enynes for the synthesis of functionalized 1-indanone**

Hua-Feng Yan,<sup>a</sup> Xiao Zou,<sup>b</sup> Jian-Qiang Wang,<sup>a</sup> Cheng Guo<sup>a\*</sup> and Hang-Dong Zuo<sup>c\*</sup>

<sup>a</sup> College of Chemistry and Molecular Engineering, Nanjing Tech University, Nanjing 211816, P. R. China;

<sup>b</sup> School of Pharmacy, Changzhou University, Changzhou, Jiangsu 213164, P. R. China;

<sup>c</sup> School of Safety Science and Engineering, Changzhou University, Changzhou, Jiangsu 213164, China;  
guocheng@njtech.edu.cn, zhd0513@cczu.edu.cn

### Contents

|                                                                                                                                   |         |
|-----------------------------------------------------------------------------------------------------------------------------------|---------|
| General Information.....                                                                                                          | S2      |
| General procedure for the synthesis of compounds <b>4</b> and <b>6</b> .....                                                      | S2      |
| Crystallographic Data of Compound <b>4a</b> .....                                                                                 | S2-S3   |
| Scale-Up Transformation of <b>4a</b> .....                                                                                        | S3      |
| The synthesis of <b>7</b> .....                                                                                                   | S3-S4   |
| Radical inhibition experiments with <b>TEMPO</b> .....                                                                            | S4      |
| Radical inhibition experiments with <b>BHT</b> .....                                                                              | S4      |
| HRMS analysis of reaction solution .....                                                                                          | S5      |
| Reference .....                                                                                                                   | S6      |
| Characterization Data for Compounds <b>4a-4m</b> , <b>6a-6k</b> .....                                                             | S6-S11  |
| Copies of <sup>1</sup> H, <sup>13</sup> C, <sup>19</sup> F NMR Spectra for Compounds <b>4a-4m</b> , <b>6a-6k</b> , <b>7</b> ..... | S12-S64 |

## General Information

PE refers to petroleum ether (b.p. 60-90 °C) and EA refers to ethyl acetate, as well as DCE refers to dichloroethane. All other starting materials and solvents were commercially available and were used without further purification unless otherwise stated. All reactions were heated by metal sand bath (WATTCAS, LAB-500, <http://www.wattcas.com>). <sup>1</sup>H NMR (<sup>13</sup>C NMR) spectra were measured on a Bruker DPX 400 MHz spectrometer in CDCl<sub>3</sub> with chemical shift ( $\delta$ ) given in ppm relative to TMS as internal standard [(s = singlet, d = doublet, m = multiplet), coupling constant (Hz)]. HRMS (APCI) was determined by using microTOF-QII HRMS/MS instrument (BRUKER). X-Ray crystallographic analysis was performed with a Siemens SMART CCD and a Siemens P4 diffractometer. The melting points were measured with digital melting point detector. Enynones **1** and **5** was prepared by the report<sup>1</sup>.

## General procedure for the synthesis of compounds **4** and **6**

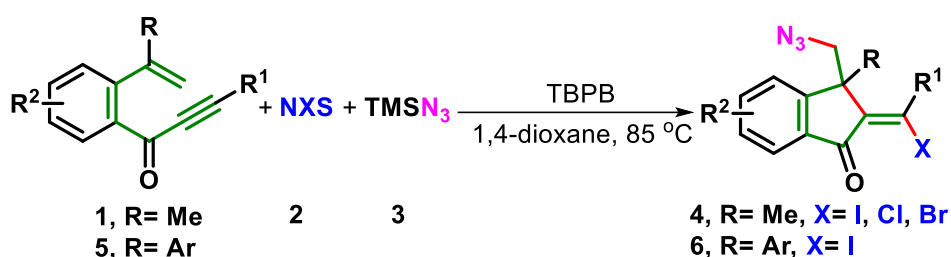

To a Schlenk tube (10 ml) were added enynones **1** or **5** (0.20 mmol, 1.0 equiv), halogen source (NIS, NCS, NBS) **2** (0.6 mmol, 3.0 equiv), azidotrimethylsilane **3** (0.40 mmol, 2.0 equiv), *tert*-butyl peroxybenzoate (TBPB, 0.40 mmol, 2.0 equiv) and anhydrous 1,4-dioxane (2.0 mL) under air condition. The resulting mixture was stirring at 85 °C in metal sand bath about 12 hours. After the reaction was complete (by TLC), the reaction mixture was cooled to room temperature and diluted with DCM (10 ml) and H<sub>2</sub>O (20 ml). The organic layer was separated, and the aqueous layer was extracted with DCM (2 × 10 mL). The combined organic layer was washed with brine (10 mL), dried over anhydrous MgSO<sub>4</sub>, filtered, and concentrated under reduced pressure. Purified product **4** or **6** was obtained after column chromatography on silica gel (PE/EA= 60/1 v/v).

## Crystallographic Data of Compound **4a**

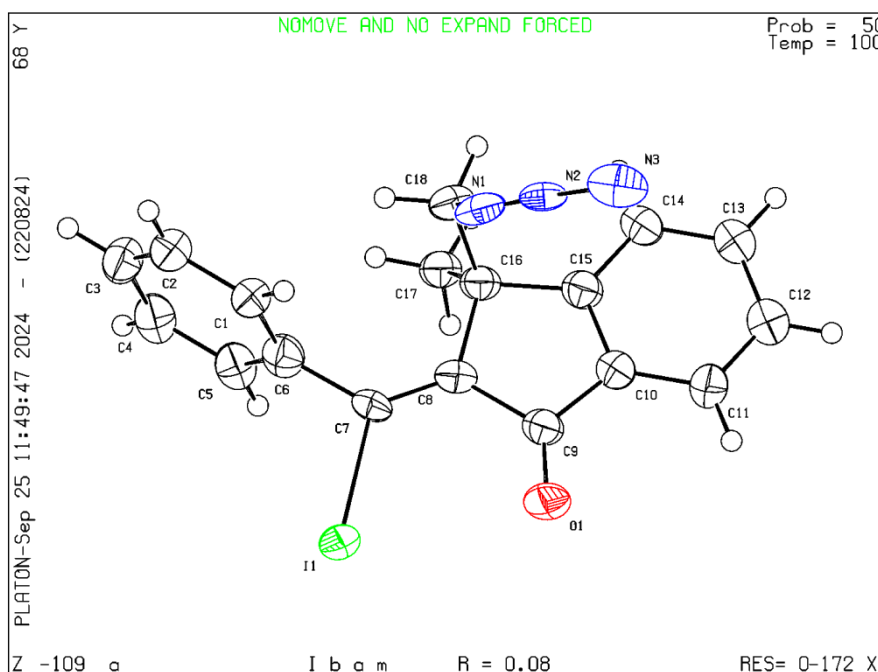

Fig. S1 ORTEP view of X-crystal structure of **4a** (CCDC number 2390559).

Procedure for recrystallization of compounds **4a**: the hexane was slowly added into the solution of **4a** in chloroform

(with different concentration), then the chloroform was evaporated from the mixed solvent system at room temperature under dark and the crystals were obtained after a few days.

| Table S1 Crystal data and structure refinement for 4a. |                                                               |
|--------------------------------------------------------|---------------------------------------------------------------|
| Identification code                                    | 4a                                                            |
| CCDC                                                   | 2390559                                                       |
| Empirical formula                                      | C <sub>18</sub> H <sub>14</sub> IN <sub>3</sub> O             |
| Formula weight                                         | 415.22                                                        |
| Temperature/K                                          | 100.1(7)                                                      |
| Crystal system                                         | orthorhombic                                                  |
| Space group                                            | Ibam                                                          |
| a/Å                                                    | 10.5176(3)                                                    |
| b/Å                                                    | 42.1854(13)                                                   |
| c/Å                                                    | 7.4578(2)                                                     |
| α/°                                                    | 90                                                            |
| β/°                                                    | 90                                                            |
| γ/°                                                    | 90                                                            |
| Volume/Å <sup>3</sup>                                  | 3308.95(16)                                                   |
| Z                                                      | 8                                                             |
| ρ <sub>calc</sub> /g/cm <sup>3</sup>                   | 1.667                                                         |
| μ/mm <sup>-1</sup>                                     | 15.268                                                        |
| F(000)                                                 | 1632.0                                                        |
| Crystal size/mm <sup>3</sup>                           | 0.12 × 0.1 × 0.09                                             |
| Radiation                                              | Cu Kα (λ = 1.54178)                                           |
| 2θ range for data collection/°                         | 8.384 to 152.154                                              |
| Index ranges                                           | -12 ≤ h ≤ 12, -51 ≤ k ≤ 49, -8 ≤ l ≤ 9                        |
| Reflections collected                                  | 5878                                                          |
| Independent reflections                                | 1752 [R <sub>int</sub> = 0.0594, R <sub>sigma</sub> = 0.0435] |
| Data/restraints/parameters                             | 1752/150/183                                                  |
| Goodness-of-fit on F <sup>2</sup>                      | 1.174                                                         |
| Final R indexes [I ≥ 2σ (I)]                           | R <sub>1</sub> = 0.0787, wR <sub>2</sub> = 0.2101             |
| Final R indexes [all data]                             | R <sub>1</sub> = 0.0812, wR <sub>2</sub> = 0.2113             |
| Largest diff. peak/hole / e Å <sup>-3</sup>            | 1.94/-0.85                                                    |

### Scale-up transformation of 4a

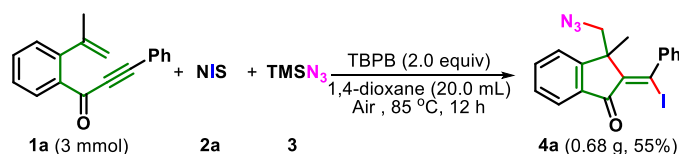

To a Schlenk tube (50 ml) were added enynone **1a** (0.738 g, 3.0 mmol, 1.0 equiv), NIS **2a** (2.025 g, 9.0 mmol, 3.0 equiv), azidotrimethylsilane **3** (0.691 g, 6.0 mmol, 2.0 equiv), TBPB (1.165 g, 6.0 mmol, 2.0 equiv) and anhydrous 1,4-dioxane (20.0 mL) under air condition. The resulting mixture was stirring at 85 °C in metal sand bath about 12 hours. After the reaction was complete (by TLC), the reaction mixture was cooled to room temperature and diluted with DCM (50 ml) and H<sub>2</sub>O (100 ml). The organic layer was separated, and the aqueous layer was extracted with DCM (2 × 50 mL). The combined organic layer was washed with brine (50 mL), dried over anhydrous MgSO<sub>4</sub>, filtered, and concentrated under reduced pressure. Purified product **4a** (0.68 g, 55%) was obtained after column chromatography on silica gel (PE/EA= 60/1 v/v).

### The synthesis of 7

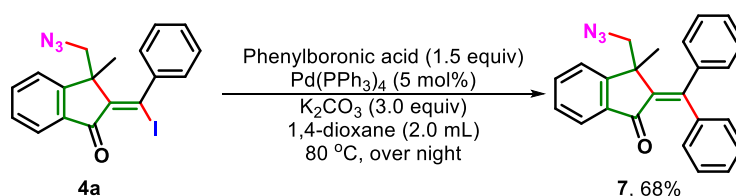

Under a nitrogen atmosphere, the following components were introduced into a 10 mL Schlenk tube: **4a** (0.20 mmol, 1.0 equiv), phenylboronic acid (0.3 mmol, 1.5 equiv), Pd(PPh<sub>3</sub>)<sub>4</sub> (5 mol%), K<sub>2</sub>CO<sub>3</sub> (0.60 mmol, 3.0 equiv), and 1,4-dioxane (2.0 mL). The resultant mixture was agitated in a metal sand bath at 80°C for an entire night. Upon completion of the reaction, confirmed by TLC analysis, the mixture was allowed to cool to ambient temperature. Subsequently, the solution was filtered and concentrated under reduced pressure. Then, the crude product was purified through flash

chromatography on silica gel using a PE/EA mixture (60/1 v/v) as the eluent, yielding the target product **7** (49 mg, 68% yield), as a pale yellow solid, mp: 120-121°C; <sup>1</sup>H NMR (400 MHz, CDCl<sub>3</sub>) (δ, ppm) 7.76 (d, *J* = 7.6 Hz, 1H), 7.68 – 7.64 (m, 1H), 7.48 – 7.40 (m, 5H), 7.37 – 7.32 (m, 4H), 7.28 (d, *J* = 6.8 Hz, 2H), 7.24 (d, *J* = 7.6 Hz, 2H), 3.57 (d, *J* = 12.4 Hz, 1H), 3.36 (d, *J* = 12.4 Hz, 1H), 1.36 (s, 3H). <sup>13</sup>C NMR (100 MHz, CDCl<sub>3</sub>) (δ, ppm) 192.8, 154.9, 153.6, 142.0, 140.6, 138.4, 137.9, 135.0, 128.6, 128.5, 128.2, 128.2, 127.9, 127.8, 127.8, 124.1, 123.1, 59.4, 48.0, 26.1. HRMS (ESI) *m/z*: [M+Na]<sup>+</sup> Calcd for C<sub>24</sub>H<sub>19</sub>N<sub>3</sub>NaO 388.1421; Found 388.1429.

### Radical inhibition experiments with TEMPO

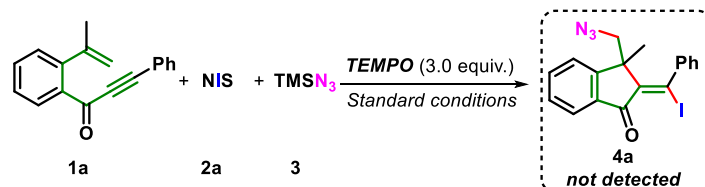

To a Schlenk tube (10 ml) were added enynones **1a** (0.20 mmol, 1.0 equiv), NIS **2a** (0.60 mmol, 3.0 equiv), azidotrimethylsilane **3** (0.40 mmol, 2.0 equiv), TBPB (0.40 mmol, 2.0 equiv), 2,2,6,6-tetramethyl-1-piperidinyloxy (TEMPO, 0.60 mmol, 3.0 equiv.) and anhydrous 1,4-dioxane (2.0 mL) under air condition. The resulting mixture was stirring at 85 °C in metal sand bath about 12 hours. The desired product **4a** was not detected by TLC.

### Radical inhibition experiments with BHT

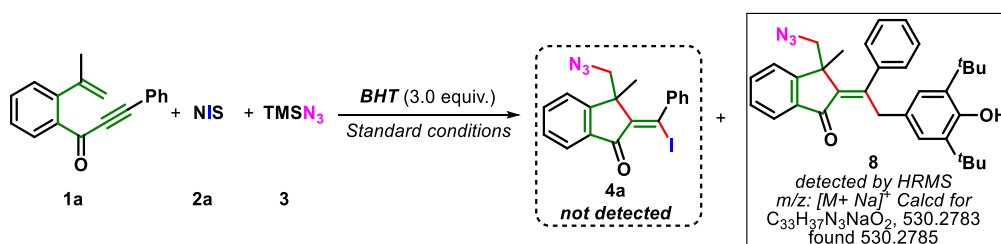

To a Schlenk tube (10 ml) were added enynones **1a** (0.20 mmol, 1.0 equiv), NIS **2a** (0.60 mmol, 3.0 equiv), azidotrimethylsilane **3** (0.40 mmol, 2.0 equiv), TBPB (0.40 mmol, 2.0 equiv), 2,6-Di-tert-butylphenol (BHT, 0.60 mmol, 3.0 equiv.) and anhydrous 1,4-dioxane (2.0 mL) under air condition. The resulting mixture was stirring at 85 °C in metal sand bath about 12 hours. The desired product **4a** was not detected by TLC, but HRMS analysis of the solution revealed signal peaks at *m/z* 530.2785 corresponding to the BHT adduct **8**.

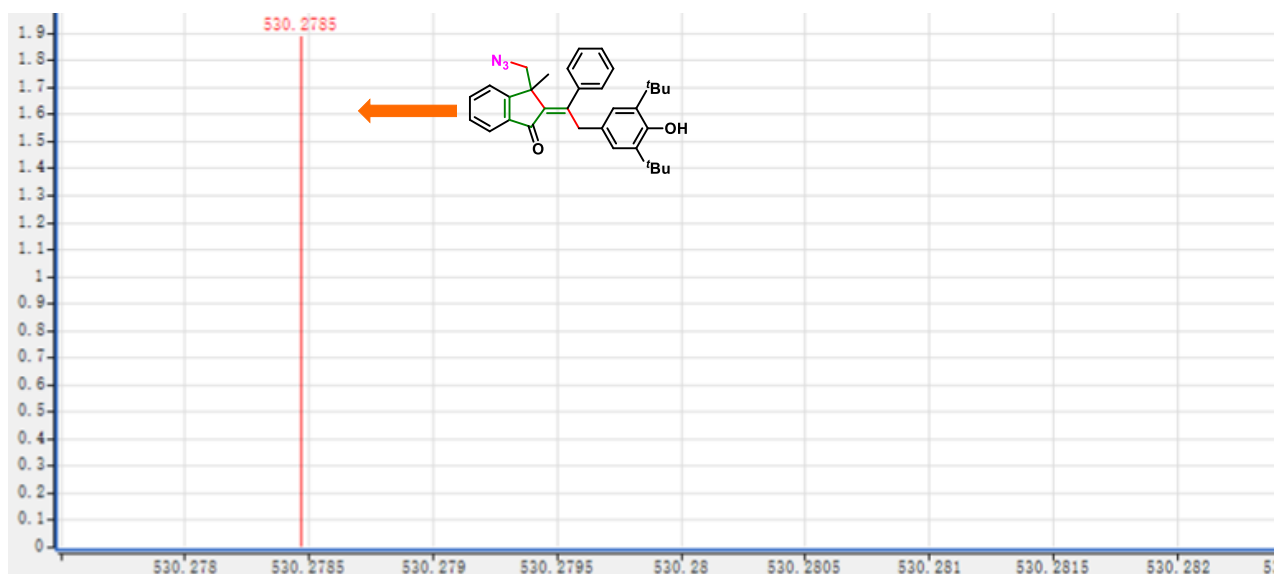

Fig. S2 HRMS analysis for the adduct BHT adduct **8**.

## HRMS analysis of reaction solution

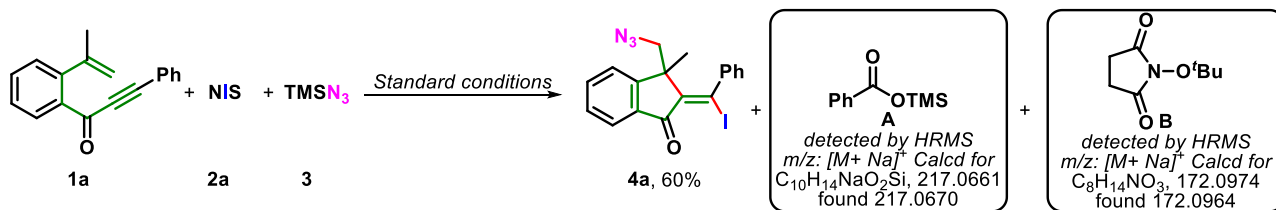

To a Schlenk tube (10 ml) were added enynes **1a** (0.20 mmol, 1.0 equiv), NIS **2a** (0.60 mmol, 3.0 equiv), azidotrimethylsilane **3** (0.40 mmol, 2.0 equiv), TBPB (0.40 mmol, 2.0 equiv) and anhydrous 1,4-dioxane (2.0 mL) under air condition. The resulting mixture was stirring at 85 °C in metal sand bath about 12 hours. HRMS analysis of the solution revealed signal peaks at  $m/z$  217.0670 and 172.0964 corresponding to trimethylsilyl 2-iodobenzoate **A** and 1-(*tert*-butoxy)pyrrolidine-2,5-dione **B**, respectively.

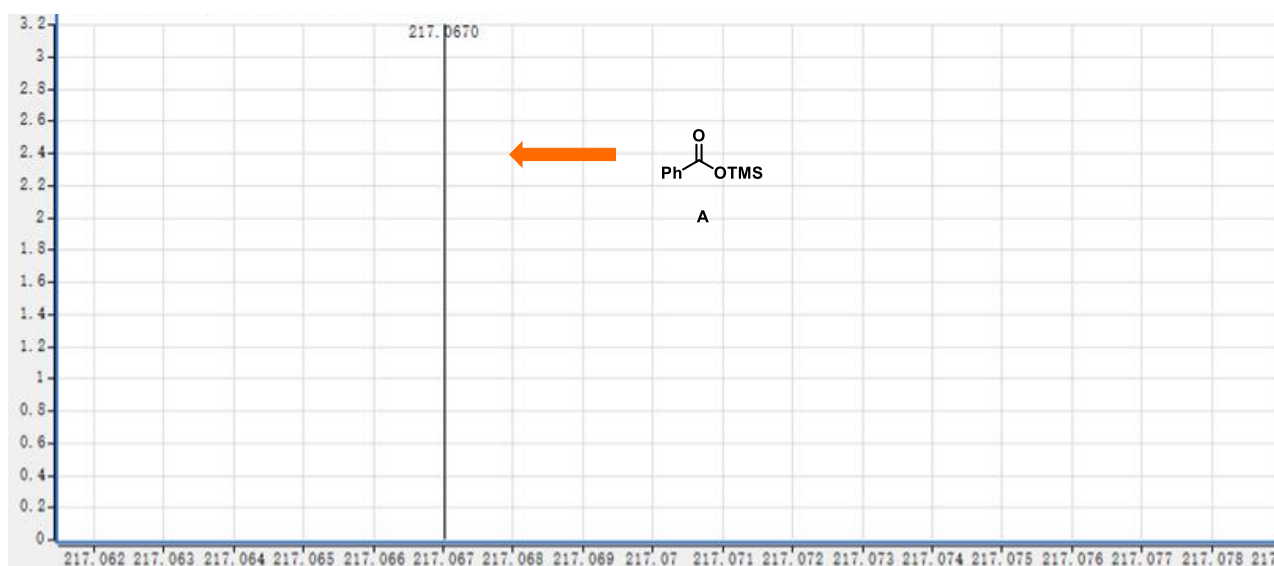

Fig. S3 HRMS analysis for the detection of trimethylsilyl 2-iodobenzoate **A**

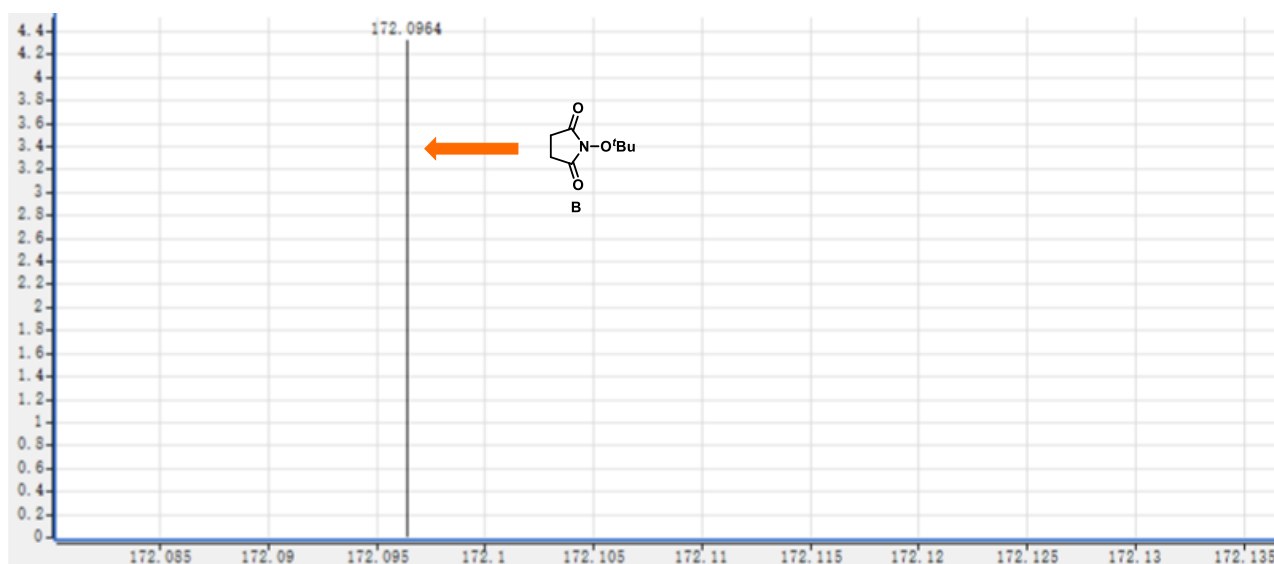

Fig. S4 HRMS analysis for the detection of 1-(*tert*-butoxy)pyrrolidine-2,5-dione **B**

## Reference

1. F. Wu and S. Zhu, *Org. Lett.* 2019, **21**, 1488-1492.

## Characterization data

### **(Z)-3-(azidomethyl)-2-(iodo(phenyl)methylene)-3-methyl-2,3-dihydro-1H-inden-1-one (4a)**

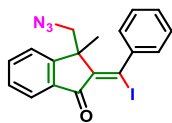

Isolation by column chromatography (PE/EA= 60/1 v/v) Pale yellow solid; 50 mg, 60% yield, *Z/E* = 4: 1; mp: 143-144 °C; <sup>1</sup>H NMR (400 MHz, CDCl<sub>3</sub>) (δ, ppm) 8.14 (d, *J* = 7.6 Hz, 1H), 7.92 – 7.88 (m, 1H), 7.69 – 7.66 (m, 3H), 7.59 – 7.53 (m, 2H), 7.47 – 7.40 (m, 2H), 3.73 (d, *J* = 12.4 Hz, 1H), 3.46 (d, *J* = 12.4 Hz, 1H), 1.46 (s, 3H). <sup>13</sup>C NMR (150 MHz, CDCl<sub>3</sub>) (δ, ppm) 190.3, 152.8, 144.9, 142.3, 137.2, 135.7, 130.2, 128.8, 128.6, 124.7, 122.6, 105.8, 59.1, 51.3, 25.2. HRMS (ESI) *m/z*: [M+Na]<sup>+</sup> Calcd for C<sub>18</sub>H<sub>14</sub>IN<sub>3</sub>NaO 438.0074; Found 438.0082.

### **(Z)-3-(azidomethyl)-2-(iodo(*p*-tolyl)methylene)-3-methyl-2,3-dihydro-1H-inden-1-one (syn isomer, 4b)**

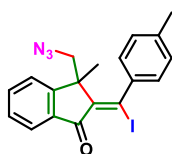

Isolation by column chromatography (PE/EA= 60/1 v/v) Pale yellow solid; 41 mg, 48% yield, *Z/E* = 1.5: 1; mp: 169-170 °C; <sup>1</sup>H NMR (400 MHz, CDCl<sub>3</sub>) (δ, ppm) 7.93 (d, *J* = 7.6 Hz, 2H), 7.72 – 7.68 (m, 6H), 7.56 (d, *J* = 7.6 Hz, 2H), 7.50 – 7.40 (m, 9H), 7.38 – 7.29 (m, 7H), 7.16 – 7.12 (m, 5H), 7.09– 7.04 (m, 9H), 4.65 (d, *J* = 12.4 Hz, 2H), 3.67 (d, *J* = 12.8 Hz, 2H), 3.55 – 3.48 (m, 3H), 3.30 – 3.24 (m, 3H), 2.39 (s, 9H), 2.37 (s, 6H), 1.78 (s, 6H), 1.26 (s, 9H). <sup>13</sup>C NMR (75 MHz, CDCl<sub>3</sub>) (δ, ppm) δ 190.4, 187.5, 155.6, 152.8, 144.8, 143.5, 142.3, 138.9, 138.7, 137.3, 136.3, 135.7, 135.4, 129.1, 128.9, 128.8(2), 128.8(0), 126.6, 124.8, 124.6, 123.6, 122.6, 117.5, 106.5, 59.1, 56.5, 51.3, 49.9, 25.3, 22.6, 21.5, 21.4. HRMS (ESI) *m/z*: [M+Na]<sup>+</sup> Calcd for C<sub>19</sub>H<sub>16</sub>IN<sub>3</sub>NaO 452.0231; Found 452.0236.

### **(Z)-3-(azidomethyl)-2-(iodo(*m*-tolyl)methylene)-3-methyl-2,3-dihydro-1H-inden-1-one (4c, major)**

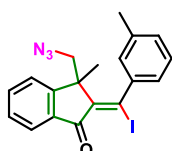

Isolation by column chromatography (PE/EA= 60/1 v/v) Pale yellow solid; 39 mg, 45% yield, *Z/E* = 4: 1; mp: 111-112 °C; <sup>1</sup>H NMR (400 MHz, CDCl<sub>3</sub>) (δ, ppm) 7.93 (d, *J* = 7.6 Hz, 1H), 7.73 – 7.67 (m, 2H), 7.50 – 7.45 (m, 2H), 7.20 – 7.15 (m, 3H), 3.52 (d, *J* = 12.4 Hz, 1H), 3.28 (d, *J* = 12.0 Hz, 1H), 2.43 (s, 3H), 1.26 (s, 3H). <sup>13</sup>C NMR (75 MHz, CDCl<sub>3</sub>) (δ, ppm) 187.4, 155.6, 146.2, 144.8, 137.9, 136.3, 135.7, 135.4, 129.5, 128.8, 128.0, 127.0, 124.6, 123.6, 117.2, 56.5, 49.8, 22.6, 21.6. HRMS (ESI) *m/z*: [M+Na]<sup>+</sup> Calcd for C<sub>19</sub>H<sub>16</sub>IN<sub>3</sub>NaO 452.0231; Found 452.0235.

### **(Z)-3-(azidomethyl)-2-((4-(*tert*-butyl)phenyl)iodomethylene)-3-methyl-2,3-dihydro-1H-inden-1-one (4d, major)**

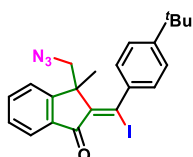

Isolation by column chromatography (PE/EA= 60/1 v/v) Pale yellow solid; 58 mg, 62% yield, *Z/E* = 5: 1; mp: 151-152 °C; <sup>1</sup>H NMR (400 MHz, CDCl<sub>3</sub>) (δ, ppm) 7.93 (d, *J* = 7.6 Hz, 1H), 7.71 – 7.67 (m, 1H), 7.48 – 7.45 (m, 4H), 7.23 – 7.17 (m, 2H), 3.52 (d, *J* = 12.4 Hz, 1H), 3.27 (d, *J* = 12.0 Hz, 1H), 1.36 (s, 9H), 1.26 (s, 3H). <sup>13</sup>C NMR (100 MHz, CDCl<sub>3</sub>) (δ, ppm) 190.4, 152.8, 152.1, 142.3, 142.1, 137.3, 135.7, 128.8, 126.5, 125.3, 124.8, 122.6, 106.7, 59.2, 51.3, 34.8, 31.4, 25.3. HRMS (ESI) *m/z*: [M+Na]<sup>+</sup> Calcd for C<sub>22</sub>H<sub>22</sub>IN<sub>3</sub>NaO 494.0700; Found 494.0707.

### **(Z)-3-(azidomethyl)-2-((4-chlorophenyl)iodomethylene)-3-methyl-2,3-dihydro-1H-inden-1-one (4e, major)**

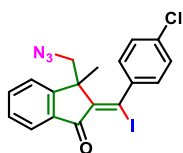

Isolation by column chromatography (PE/EA= 60/1 v/v) Pale yellow solid; 52 mg, 58% yield,  $Z/E = 5:1$ ; mp: 155-156 °C;  $^1\text{H NMR}$  (400 MHz,  $\text{CDCl}_3$ ) ( $\delta$ , ppm) 7.94 (d,  $J = 7.6$  Hz, 1H), 7.73 – 7.70 (m, 1H), 7.52 – 7.44 (m, 4H), 7.21 (d,  $J = 8.4$  Hz, 2H), 3.55 (d,  $J = 12.4$  Hz, 1H), 3.24 (d,  $J = 12.4$  Hz, 1H), 1.26 (s, 3H).  $^{13}\text{C NMR}$  (75 MHz,  $\text{CDCl}_3$ ) ( $\delta$ , ppm) 187.5, 155.6, 145.6, 144.5, 136.1, 135.7, 134.5, 129.0, 128.5, 128.1, 124.7, 123.6, 114.6, 56.4, 49.9, 22.6. HRMS (ESI)  $m/z$ :  $[\text{M}+\text{Na}]^+$  Calcd for  $\text{C}_{18}\text{H}_{13}\text{ClIN}_3\text{NaO}$  471.9685; Found 471.9691.

**(Z)-3-(azidomethyl)-2-((4-bromophenyl)iodomethylene)-3-methyl-2,3-dihydro-1H-inden-1-one (4f, major)**

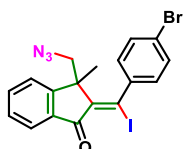

Isolation by column chromatography (PE/EA= 60/1 v/v) Pale yellow solid; 59 mg, 60% yield,  $Z/E = 10:1$ ; mp: 164-165 °C;  $^1\text{H NMR}$  (400 MHz,  $\text{CDCl}_3$ ) ( $\delta$ , ppm) 7.94 (d,  $J = 7.6$  Hz, 1H), 7.73 – 7.70 (m, 1H), 7.60 (s, 2H), 7.50 – 7.46 (m, 2H), 7.20 – 7.08 (m, 2H), 3.55 (d,  $J = 12.4$  Hz, 1H), 3.24 (d,  $J = 12.4$  Hz, 1H), 1.27 (s, 3H).  $^{13}\text{C NMR}$  (75 MHz,  $\text{CDCl}_3$ ) ( $\delta$ , ppm) 190.1, 152.6, 143.8, 135.9, 135.6, 131.7, 131.4, 129.0, 128.3, 124.9, 124.6, 123.6, 122.6, 114.5, 59.2, 51.4, 22.5. HRMS (ESI)  $m/z$ :  $[\text{M}+\text{Na}]^+$  Calcd for  $\text{C}_{18}\text{H}_{13}\text{BrIN}_3\text{NaO}$  515.9179; Found 515.9186.

**methyl (Z)-4-((1-(azidomethyl)-1-methyl-3-oxo-1,3-dihydro-2H-inden-2-ylidene)iodomethyl)benzoate (syn isomer, 4g)**

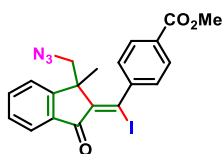

Isolation by column chromatography (PE/EA= 60/1 v/v) Pale yellow solid; 67 mg, 71% yield,  $Z/E = 1:1$ ; mp: 134-135 °C;  $^1\text{H NMR}$  (400 MHz,  $\text{CDCl}_3$ ) ( $\delta$ , ppm) 8.13 – 8.08 (m, 4H), 7.94 (d,  $J = 7.6$  Hz, 1H), 7.73 – 7.70 (m, 3H), 7.57 (d,  $J = 8.0$  Hz, 1H), 7.51 (d,  $J = 7.6$  Hz, 1H), 7.46 (d,  $J = 8.0$  Hz, 2H), 7.37 – 7.32 (m, 4H), 4.64 (d,  $J = 12.4$  Hz, 1H), 3.97 (s, 3H), 3.93 (s, 3H), 3.68 (d,  $J = 12.4$  Hz, 1H), 3.52 (d,  $J = 12.4$  Hz, 1H), 3.21 (d,  $J = 12.4$  Hz, 1H), 1.79 (s, 3H), 1.24 (s, 3H).  $^{13}\text{C NMR}$  (100 MHz,  $\text{CDCl}_3$ ) ( $\delta$ , ppm) 187.5, 166.5, 155.6, 152.7, 150.5, 149.0, 145.7, 142.6, 136.0(1), 136.0(8), 135.7, 130.4, 129.9, 129.6, 129.0, 126.5, 124.9, 124.7, 123.6, 122.6, 114.1, 103.8, 59.2, 56.5, 52.5, 52.2, 51.4, 49.9, 25.2, 22.5. HRMS (ESI)  $m/z$ :  $[\text{M}+\text{Na}]^+$  Calcd for  $\text{C}_{20}\text{H}_{16}\text{IN}_3\text{NaO}_3$  496.0129; Found 496.0135.

**(Z)-3-(azidomethyl)-2-(iodo(phenyl)methylene)-3,5-dimethyl-2,3-dihydro-1H-inden-1-one (4h, major)**

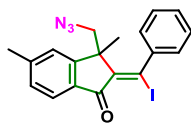

Isolation by column chromatography (PE/EA= 60/1 v/v) Pale yellow solid; 49 mg, 57% yield,  $Z/E = 4:1$ ; mp: 146-147 °C;  $^1\text{H NMR}$  (400 MHz,  $\text{CDCl}_3$ ) ( $\delta$ , ppm) 7.86 (d,  $J = 7.6$  Hz, 1H), 7.54 – 7.43 (m, 3H), 7.39 – 7.36 (m, 1H), 7.34 – 7.28 (m, 3H), 3.54 (d,  $J = 12.0$  Hz, 1H), 3.28 (d,  $J = 12.4$  Hz, 1H), 2.51 (s, 3H), 1.28 (s, 3H).  $^{13}\text{C NMR}$  (100 MHz,  $\text{CDCl}_3$ ) ( $\delta$ , ppm) 187.1, 156.1, 146.9, 145.3, 142.6, 134.1, 130.2, 128.6, 128.2, 126.5, 124.5, 123.8, 116.0, 56.4, 49.7, 22.6, 22.5. HRMS (ESI)  $m/z$ :  $[\text{M}+\text{Na}]^+$  Calcd for  $\text{C}_{19}\text{H}_{16}\text{IN}_3\text{NaO}$  452.0231; Found 452.0233.

**(Z)-3-(azidomethyl)-5-fluoro-2-(iodo(phenyl)methylene)-3-methyl-2,3-dihydro-1H-inden-1-one (4i, major)**

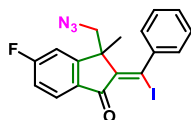

Isolation by column chromatography (PE/EA= 60/1 v/v) Pale yellow solid; 61 mg, 71% yield,  $Z/E = 5:1$ ; mp: 152-153 °C;  $^1\text{H NMR}$  (400 MHz,  $\text{CDCl}_3$ ) ( $\delta$ , ppm) 7.97 – 7.93 (m, 1H), 7.45 – 7.39 (m, 3H), 7.37 – 7.33 (m, 1H), 7.20 – 7.16 (m, 2H),

7.12 (d,  $J = 8.4$  Hz, 1H), 3.48 (d,  $J = 12.4$  Hz, 1H), 3.27 (d,  $J = 12.0$  Hz, 1H), 1.24 (s, 3H).  $^{13}\text{C}$  NMR (100 MHz,  $\text{CDCl}_3$ ) ( $\delta$ , ppm) 188.7, 167.6 ( $^1J_{\text{CF}} = 255.9$  Hz), 155.8 ( $^3J_{\text{CF}} = 9.2$  Hz), 144.8, 142.0, 133.7, 129.0, 127.4, 127.3, 117.3 ( $^2J_{\text{CF}} = 23.5$  Hz), 109.8, 109.6, 106.3, 58.9, 51.2, 25.1.  $^{19}\text{F}$  NMR (282 MHz,  $\text{CDCl}_3$ )  $\delta$  ppm: -100.55. HRMS (ESI)  $m/z$ :  $[\text{M}+\text{Na}]^+$  Calcd for  $\text{C}_{18}\text{H}_{13}\text{FIN}_3\text{NaO}$  455.9980; Found 455.9986.

**(Z)-3-(azidomethyl)-6-chloro-2-(iodo(phenyl)methylene)-3-methyl-2,3-dihydro-1H-inden-1-one (4j, major)**

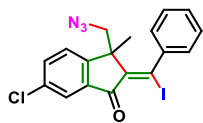

Isolation by column chromatography (PE/EA= 60/1 v/v) Pale yellow solid; 42 mg, 47% yield,  $Z/E = 10:1$ ; mp: 151-152 °C;  $^1\text{H}$  NMR (400 MHz,  $\text{CDCl}_3$ ) ( $\delta$ , ppm) 7.87 (d,  $J = 1.2$  Hz, 1H), 7.65 (d,  $J = 8.4$  Hz, 1H), 7.52 – 7.45 (m, 2H), 7.41 (d,  $J = 8.4$  Hz, 1H), 7.37 – 7.33 (m, 1H), 7.30 – 7.25 (m, 2H), 3.49 (d,  $J = 12.4$  Hz, 1H), 3.27 (d,  $J = 12.0$  Hz, 1H), 1.24 (s, 3H).  $^{13}\text{C}$  NMR (100 MHz,  $\text{CDCl}_3$ ) ( $\delta$ , ppm) 189.1, 150.9, 144.8, 142.1, 138.6, 135.8, 135.2, 129.0, 128.3, 126.4, 124.5, 124.1, 107.2, 58.9, 51.1, 25.2. HRMS (ESI)  $m/z$ :  $[\text{M}+\text{Na}]^+$  Calcd for  $\text{C}_{18}\text{H}_{13}\text{ClIN}_3\text{NaO}$  471.9685; Found 471.9694.

**(Z)-3-(azidomethyl)-2-(chloro(phenyl)methylene)-3-methyl-2,3-dihydro-1H-inden-1-one (4k, major)**

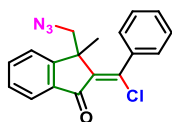

Isolation by column chromatography (PE/EA= 60/1 v/v) Pale yellow solid; 19 mg, 30% yield,  $Z/E > 19:1$ ; mp: 148-149 °C;  $^1\text{H}$  NMR (400 MHz,  $\text{CDCl}_3$ ) ( $\delta$ , ppm) 8.12 – 8.10 (m, 2H), 7.70 – 7.64 (m, 2H), 7.53 (d,  $J = 7.6$  Hz, 1H), 7.46 (s, 3H), 7.40 – 7.37 (m, 1H), 4.26 (d,  $J = 15.2$  Hz, 2H), 1.70 (s, 3H).  $^{13}\text{C}$  NMR (75 MHz,  $\text{CDCl}_3$ ) ( $\delta$ , ppm) 188.8, 155.1, 146.4, 137.4, 135.5, 131.0, 129.7, 128.8, 128.4, 128.2, 128.1, 124.4, 123.3, 57.2, 49.5, 22.5. HRMS (ESI)  $m/z$ :  $[\text{M}+\text{Na}]^+$  Calcd for  $\text{C}_{18}\text{H}_{14}\text{ClN}_3\text{NaO}$  346.0718; Found 346.0727.

**(Z)-3-(azidomethyl)-2-(bromo(phenyl)methylene)-3-methyl-2,3-dihydro-1H-inden-1-one (4l, major)**

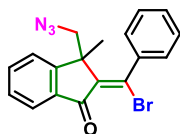

Isolation by column chromatography (PE/EA= 60/1 v/v) Pale yellow solid; 26 mg, 36% yield,  $Z/E = 10:1$ ; mp: 134-136 °C;  $^1\text{H}$  NMR (400 MHz,  $\text{CDCl}_3$ ) ( $\delta$ , ppm) 7.72 – 7.69 (m, 2H), 7.56 (d,  $J = 7.6$  Hz, 1H), 7.47 – 7.42 (m, 4H), 7.38 (d,  $J = 7.6$  Hz, 2H), 4.70 (d,  $J = 10.4$  Hz, 1H), 3.83 (d,  $J = 10.4$  Hz, 1H), 1.93 (s, 3H).  $^{13}\text{C}$  NMR (100 MHz,  $\text{CDCl}_3$ ) ( $\delta$ , ppm)  $\delta$  188.1, 155.4, 141.2, 140.3, 138.5, 137.1, 135.5, 129.3, 128.8, 128.2, 127.9, 124.4, 122.8, 49.8, 38.6, 23.8. HRMS (ESI)  $m/z$ :  $[\text{M}+\text{Na}]^+$  Calcd for  $\text{C}_{18}\text{H}_{14}\text{BrN}_3\text{NaO}$  390.0213; Found 390.0220.

**(Z)-6-(azidomethyl)-5-(iodo(phenyl)methylene)-6-methyl-5,6-dihydro-4H-cyclopenta[b]thiophen-4-one (syn isomer, 4l)**

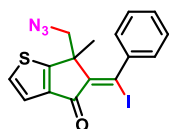

Isolation by column chromatography (PE/EA= 60/1 v/v) Pale yellow solid; 27 mg, 32% yield,  $Z/E = 1:1$ ; mp: 134-136 °C;  $^1\text{H}$  NMR (400 MHz,  $\text{CDCl}_3$ ) ( $\delta$ , ppm) 7.91 – 7.88 (m, 2H), 7.49 – 7.44 (m, 2H), 7.41 – 7.30 (m, 4H), 7.27 (s, 1H), 7.26 – 7.19 (m, 3H), 7.15 (d,  $J = 4.8$  Hz, 1H), 7.06 (d,  $J = 4.8$  Hz, 1H), 4.39 (d,  $J = 12.4$  Hz, 1H), 3.78 (d,  $J = 12.4$  Hz, 1H), 3.43 (d,  $J = 12.4$  Hz, 1H), 3.19 (d,  $J = 12.0$  Hz, 1H), 1.78 (s, 3H), 1.24 (s, 3H).  $^{13}\text{C}$  NMR (150 MHz,  $\text{CDCl}_3$ ) ( $\delta$ , ppm)  $\delta$  181.8, 179.2, 168.5, 165.6, 147.7, 145.6, 145.2, 144.7, 142.6, 141.2, 140.5, 140.4, 128.8, 128.6, 128.1, 126.6, 121.9, 120.9, 113.8, 103.9, 58.6, 56.0, 50.2, 49.1, 24.3, 21.8. HRMS (ESI)  $m/z$ :  $[\text{M}+\text{Na}]^+$  Calcd for  $\text{C}_{16}\text{H}_{12}\text{IN}_3\text{NaOS}$  443.9638; Found 443.9640.

**(Z)-3-(azidomethyl)-2-(iodo(phenyl)methylene)-3-phenyl-2,3-dihydro-1H-inden-1-one (6a, major)**



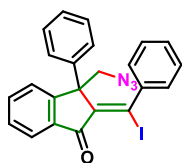

Isolation by column chromatography (PE/EA= 60/1 v/v) Pale yellow solid; 48 mg, 50% yield,  $Z/E = 5:1$ ; mp: 130-131 °C;  $^1\text{H NMR}$  (400 MHz,  $\text{CDCl}_3$ ) ( $\delta$ , ppm) 7.77 (d,  $J = 7.6$  Hz, 1H), 7.59 – 7.54 (m, 2H), 7.41 (d,  $J = 7.6$  Hz, 3H), 7.36 (d,  $J = 8.0$  Hz, 2H), 7.33 – 7.31 (m, 3H), 7.18 (d,  $J = 8.0$  Hz, 1H), 7.10 (d,  $J = 8.0$  Hz, 1H), 6.65 (d,  $J = 7.2$  Hz, 1H), 5.04 (d,  $J = 11.6$  Hz, 1H), 4.31 (d,  $J = 12.0$  Hz, 1H).  $^{13}\text{C NMR}$  (75 MHz,  $\text{CDCl}_3$ ) ( $\delta$ , ppm) 187.6, 155.2, 145.4, 141.6, 136.9, 135.6, 129.0, 128.8, 128.5, 128.1, 127.5, 127.3, 126.8, 125.1, 124.6, 119.7, 107.3, 57.8, 55.8. HRMS (ESI)  $m/z$ :  $[\text{M}+\text{Na}]^+$  Calcd for  $\text{C}_{23}\text{H}_{16}\text{IN}_3\text{NaO}$  500.0231; Found 500.0239.

**(Z)-3-(azidomethyl)-2-(iodo(phenyl)methylene)-3-(p-tolyl)-2,3-dihydro-1H-inden-1-one (6b, major)**

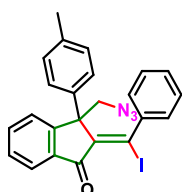

Isolation by column chromatography (PE/EA= 60/1 v/v) Pale yellow solid; 46 mg, 47% yield,  $Z/E = 5:1$ ; mp: 183-184 °C;  $^1\text{H NMR}$  (400 MHz,  $\text{CDCl}_3$ ) ( $\delta$ , ppm) 7.75 (d,  $J = 7.2$  Hz, 1H), 7.58 – 7.56 (m, 1H), 7.42 – 7.39 (m, 4H), 7.34 – 7.33 (m, 1H), 7.30 (d,  $J = 7.6$  Hz, 2H), 7.15 (d,  $J = 8.4$  Hz, 4H), 5.02 (d,  $J = 11.6$  Hz, 1H), 4.27 (d,  $J = 11.6$  Hz, 1H), 2.34 (s, 3H).  $^{13}\text{C NMR}$  (75 MHz,  $\text{CDCl}_3$ ) ( $\delta$ , ppm) 187.7, 155.4, 146.6, 145.5, 138.5, 137.0, 136.8, 135.6, 129.7, 128.8(9), 128.8(6), 128.1, 127.3, 126.7, 125.0, 124.5, 119.6, 57.5, 55.9, 21.2. HRMS (ESI)  $m/z$ :  $[\text{M}+\text{Na}]^+$  Calcd for  $\text{C}_{24}\text{H}_{18}\text{IN}_3\text{NaO}$  514.0387; Found 514.0391.

**(Z)-3-(azidomethyl)-3-(4-(tert-butyl)phenyl)-2-((4-chlorophenyl)iodomethylene)-2,3-dihydro-1H-inden-1-one (syn isomer, 6c)**

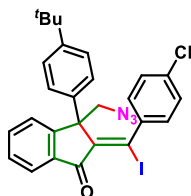

Isolation by column chromatography (PE/EA= 60/1 v/v) Pale yellow solid; 59 mg, 52% yield,  $Z/E = 2:1$ ; mp: 208-209 °C;  $^1\text{H NMR}$  (400 MHz,  $\text{CDCl}_3$ ) ( $\delta$ , ppm) 7.99 (d,  $J = 7.6$  Hz, 1H), 7.76 (d,  $J = 7.6$  Hz, 2H), 7.60 – 7.56 (m, 3H), 7.51 – 7.47 (m, 2H), 7.44 – 7.40 (m, 3H), 7.38 – 7.34 (m, 8H), 7.26 – 7.19 (m, 8H), 7.14 – 7.10 (m, 7H), 6.57 (d,  $J = 8.0$  Hz, 2H), 5.01 (d,  $J = 11.6$  Hz, 2H), 4.26 (d,  $J = 11.6$  Hz, 2H), 4.09 (d,  $J = 11.6$  Hz, 1H), 3.83 (d,  $J = 12.0$  Hz, 1H), 1.31 (s, 18H), 1.29 (s, 9H).  $^{13}\text{C NMR}$  (100 MHz,  $\text{CDCl}_3$ ) ( $\delta$ , ppm) 190.9, 187.9, 155.3, 152.9, 150.4, 150.3, 147.1, 143.8, 142.7, 138.1, 137.7, 136.7, 136.2, 135.8, 134.6, 129.0, 128.9, 128.4, 128.3, 127.9, 127.4, 127.0, 126.4, 125.9, 125.4, 125.1, 124.5, 117.5, 57.5, 57.4, 57.2, 55.8, 34.5, 31.3, 31.3, 29.7. HRMS (ESI)  $m/z$ :  $[\text{M}+\text{Na}]^+$  Calcd for  $\text{C}_{27}\text{H}_{23}\text{ClIN}_3\text{NaO}$  590.0467; Found 590.0476.

**(Z)-3-(azidomethyl)-2-(iodo(p-tolyl)methylene)-3-phenyl-2,3-dihydro-1H-inden-1-one (syn isomer, 6d)**

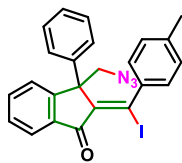

Isolation by column chromatography (PE/EA= 60/1 v/v) Pale yellow solid; 47 mg, 48% yield,  $Z/E = 1:1$ ; mp: 118-119 °C;  $^1\text{H NMR}$  (400 MHz,  $\text{CDCl}_3$ ) ( $\delta$ , ppm) 7.99 (d,  $J = 7.6$  Hz, 1H), 7.77 (d,  $J = 7.2$  Hz, 1H), 7.60 – 7.54 (m, 2H), 7.49 – 7.45 (m, 1H), 7.43 – 7.39 (m, 2H), 7.36 (d,  $J = 7.6$  Hz, 2H), 7.30 (d,  $J = 7.2$  Hz, 1H), 7.25 – 7.18 (m, 6H), 7.14 – 7.08 (m, 6H), 6.97 – 6.80 (m, 2H), 6.67 (d,  $J = 7.6$  Hz, 2H), 5.03 (d,  $J = 11.6$  Hz, 1H), 4.30 (d,  $J = 11.6$  Hz, 1H), 4.10 (d,  $J = 11.6$

Hz, 1H), 3.81 (d,  $J = 12.0$  Hz, 1H), 2.41 (s, 3H), 2.31 (s, 3H).  $^{13}\text{C}$  NMR (100 MHz,  $\text{CDCl}_3$ ) ( $\delta$ , ppm) 191.0, 187.6, 155.1, 153.0, 146.3, 144.0, 143.2, 142.6, 141.7, 141.6, 138.9, 138.1, 137.8, 136.9, 136.0, 135.5, 129.0, 128.8(4), 128.8(1), 128.8(9), 128.5, 128.4, 127.5, 127.2, 126.9, 126.8, 126.7, 125.9, 125.1, 124.6, 124.5, 124.3, 120.5, 107.9, 57.8, 57.3, 56.7, 55.9, 21.5, 21.3. HRMS (ESI)  $m/z$ :  $[\text{M}+\text{Na}]^+$  Calcd for  $\text{C}_{24}\text{H}_{18}\text{IN}_3\text{NaO}$  514.0387; Found 514.0396.

**(Z)-3-(azidomethyl)-2-((4-(benzyloxy)phenyl)iodomethylene)-3-phenyl-2,3-dihydro-1H-inden-1-one (6e, major)**

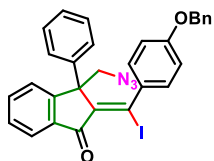

Isolation by column chromatography (PE/EA= 60/1 v/v) Pale yellow solid; 78 mg, 67% yield,  $Z/E = 2.5$ : 1; mp: 144-145 °C;  $^1\text{H}$  NMR (400 MHz,  $\text{CDCl}_3$ ) ( $\delta$ , ppm) 8.02 (d,  $J = 7.6$  Hz, 1H), 7.62 – 7.57 (m, 2H), 7.47 – 7.43 (m, 6H), 7.42 – 7.36 (m, 4H), 7.13 – 7.10 (m, 3H), 7.03 (d,  $J = 8.8$  Hz, 1H), 6.69 (d,  $J = 6.8$  Hz, 1H), 5.13 (s, 1H), 5.06 (d,  $J = 4.8$  Hz, 1H), 4.21 – 4.10 (m, 1H), 3.93 – 3.80 (m, 1H).  $^{13}\text{C}$  NMR (100 MHz,  $\text{CDCl}_3$ ) ( $\delta$ , ppm) 191.0, 158.3, 152.9, 144.3, 143.3, 137.8, 137.2, 136.6, 136.0, 128.9, 128.7, 128.5, 128.2, 128.1, 127.7, 127.5, 126.9, 126.7, 124.5, 124.3, 114.2, 70.0, 57.3, 56.7. HRMS (ESI)  $m/z$ :  $[\text{M}+\text{Na}]^+$  Calcd for  $\text{C}_{30}\text{H}_{22}\text{IN}_3\text{NaO}_2$  606.0649; Found 606.0651.

**(Z)-3-(azidomethyl)-2-((4-fluorophenyl)iodomethylene)-3-phenyl-2,3-dihydro-1H-inden-1-one (6f, major)**

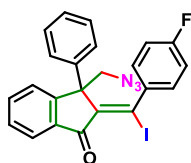

Isolation by column chromatography (PE/EA= 60/1 v/v) Pale yellow solid; 62 mg, 63% yield,  $Z/E = 10$ : 1; mp: 133-134 °C;  $^1\text{H}$  NMR (400 MHz,  $\text{CDCl}_3$ ) ( $\delta$ , ppm) 7.77 (d,  $J = 7.6$  Hz, 1H), 7.59 – 7.55 (m, 1H), 7.43 (d,  $J = 7.6$  Hz, 1H), 7.36 (d,  $J = 7.2$  Hz, 2H), 7.31 (d,  $J = 7.2$  Hz, 3H), 7.24 (d,  $J = 8.0$  Hz, 2H), 7.17 (d,  $J = 8.0$  Hz, 1H), 7.11 – 7.07 (m, 2H), 5.03 (d,  $J = 12.0$  Hz, 1H), 4.29 (d,  $J = 12.0$  Hz, 1H).  $^{13}\text{C}$  NMR (100 MHz,  $\text{CDCl}_3$ ) ( $\delta$ , ppm) 187.7, 162.8 ( $^1J_{\text{CF}} = 247.7$  Hz), 155.1, 147.0, 141.5, 141.3 ( $^3J_{\text{CF}} = 3.6$  Hz), 136.8, 135.8, 129.0(4), 129.0(6), 127.4, 127.3, 126.7, 125.1, 124.6, 118.2, 115.2 ( $^2J_{\text{CF}} = 21.9$  Hz), 57.8, 55.8.  $^{19}\text{F}$  NMR (282 MHz,  $\text{CDCl}_3$ )  $\delta$  ppm: -111.99. HRMS (ESI)  $m/z$ :  $[\text{M}+\text{Na}]^+$  Calcd for  $\text{C}_{23}\text{H}_{15}\text{FIN}_3\text{NaO}$  518.0137; Found 518.0144.

**(Z)-3-(azidomethyl)-2-((4-chlorophenyl)iodomethylene)-3-phenyl-2,3-dihydro-1H-inden-1-one (syn isomer, 6g)**

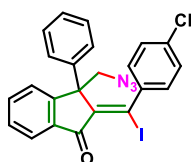

Isolation by column chromatography (PE/EA= 60/1 v/v) Pale yellow solid; 57 mg, 56% yield,  $Z/E = 2$ : 1; mp: 136-137 °C;  $^1\text{H}$  NMR (400 MHz,  $\text{CDCl}_3$ ) ( $\delta$ , ppm) 7.77 (d,  $J = 7.6$  Hz, 3H), 7.60 – 7.56 (m, 3H), 7.45 – 7.41 (m, 4H), 7.38 (d,  $J = 7.2$  Hz, 7H), 7.35 (d,  $J = 4.8$  Hz, 6H), 7.32 – 7.29 (m, 4H), 7.24 (d,  $J = 8.4$  Hz, 8H), 7.18 – 7.14 (m, 4H), 5.08 (d,  $J = 9.6$  Hz, 1H), 5.02 (d,  $J = 11.6$  Hz, 2H), 4.29 (d,  $J = 12.0$  Hz, 2H), 4.14 (d,  $J = 9.6$  Hz, 1H).  $^{13}\text{C}$  NMR (75 MHz,  $\text{CDCl}_3$ ) ( $\delta$ , ppm) 187.6, 155.1, 147.1, 144.8, 143.7, 142.9, 142.7, 141.4, 137.7, 136.7, 136.2, 135.8, 134.7, 134.1, 129.0(2), 129.0(6), 128.6, 128.4, 128.3, 128.1, 127.8, 127.4, 127.3, 127.2, 126.7, 125.1, 124.6, 124.3, 117.5, 105.1, 57.7, 57.4, 57.0, 55.8. HRMS (ESI)  $m/z$ :  $[\text{M}+\text{Na}]^+$  Calcd for  $\text{C}_{23}\text{H}_{15}\text{ClIN}_3\text{NaO}$  533.9841; Found 533.9845.

**(Z)-3-(azidomethyl)-2-((4-bromophenyl)iodomethylene)-3-phenyl-2,3-dihydro-1H-inden-1-one (6h, major)**

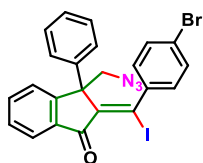

Isolation by column chromatography (PE/EA=60/1 v/v) Pale yellow solid; 44 mg, 40% yield,  $Z/E = 10$ : 1; mp: 132-133 °C;  $^1\text{H}$  NMR (400 MHz,  $\text{CDCl}_3$ ) ( $\delta$ , ppm) 7.77 (d,  $J = 7.6$  Hz, 1H), 7.60 – 7.56 (m, 1H), 7.53 (d,  $J = 8.4$  Hz, 2H), 7.45

– 7.41 (m, 1H), 7.39 – 7.35 (m, 2H), 7.31 (d,  $J = 6.8$  Hz, 1H), 7.23 (d,  $J = 7.2$  Hz, 2H), 7.17 (d,  $J = 8.0$  Hz, 3H), 5.01 (d,  $J = 11.6$  Hz, 1H), 4.29 (d,  $J = 11.6$  Hz, 1H).  $^{13}\text{C}$  NMR (100 MHz,  $\text{CDCl}_3$ ) ( $\delta$ , ppm) 187.7, 155.2, 147.1, 144.2, 141.3, 136.7, 135.9, 131.3, 129.0(4), 129.0(0), 128.5, 127.4, 127.4, 125.1, 124.6, 123.0, 117.5, 57.7, 55.8. HRMS (ESI)  $m/z$ :  $[\text{M}+\text{Na}]^+$  Calcd for  $\text{C}_{23}\text{H}_{15}\text{BrIN}_3\text{NaO}$  577.9336; Found 577.9340.

**(Z)-4-((1-(azidomethyl)-3-oxo-1-phenyl-1,3-dihydro-2H-inden-2-ylidene)iodomethyl)benzonitrile (6i, major)**

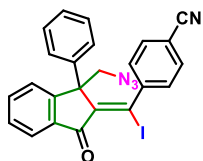

Isolation by column chromatography (PE/EA= 60/1 v/v) Pale yellow solid; 72 mg, 72% yield,  $Z/E = 4:1$ ; mp: 145-146°C;  $^1\text{H}$  NMR (400 MHz,  $\text{CDCl}_3$ ) ( $\delta$ , ppm) 7.80 – 7.76 (m, 2H), 7.70 (d,  $J = 8.0$  Hz, 2H), 7.62 – 7.58 (m, 1H), 7.46 – 7.43 (m, 1H), 7.40 – 7.35 (m, 4H), 7.23 (d,  $J = 7.6$  Hz, 2H), 7.19 (d,  $J = 8.0$  Hz, 1H), 5.01 (d,  $J = 11.6$  Hz, 1H), 4.29 (d,  $J = 11.6$  Hz, 1H).  $^{13}\text{C}$  NMR (75 MHz,  $\text{CDCl}_3$ ) ( $\delta$ , ppm) 187.7, 155.3, 149.6, 147.9, 141.0, 136.4, 136.1, 132.8, 132.0, 129.1, 127.6, 127.5, 127.4, 125.1, 124.6, 118.5, 114.8, 112.3, 57.6, 55.7. HRMS (ESI)  $m/z$ :  $[\text{M}+\text{Na}]^+$  Calcd for  $\text{C}_{24}\text{H}_{15}\text{IN}_4\text{NaO}$  525.0183; Found 525.0188.

**(Z)-3-(azidomethyl)-6-chloro-2-(iodo(phenyl)methylene)-3-phenyl-2,3-dihydro-1H-inden-1-one (6j, major)**

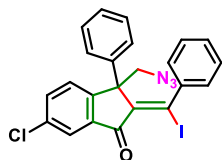

Isolation by column chromatography (PE/EA= 60/1 v/v) Pale yellow solid; 82 mg, 80% yield,  $Z/E = 5:1$ ; mp: 141-142°C;  $^1\text{H}$  NMR (400 MHz,  $\text{CDCl}_3$ ) ( $\delta$ , ppm)  $\delta$  7.70 (s, 1H), 7.51 (d,  $J = 8.4$  Hz, 1H), 7.41 – 7.38 (m, 3H), 7.35 (d,  $J = 5.6$  Hz, 2H), 7.31 – 7.28 (m, 3H), 7.23 (d,  $J = 7.6$  Hz, 2H), 7.10 (d,  $J = 8.4$  Hz, 1H), 5.03 (d,  $J = 11.8$  Hz, 1H), 4.28 (d,  $J = 12.0$  Hz, 1H), 4.06 (d,  $J = 11.6$  Hz, 1H).  $^{13}\text{C}$  NMR (100 MHz,  $\text{CDCl}_3$ ) ( $\delta$ , ppm) 186.3, 153.3, 146.3, 145.1, 141.0, 138.2, 135.7, 135.2, 129.1, 129.0, 128.2, 127.5, 127.4, 126.7, 126.6, 124.2, 120.8, 57.5, 55.6. HRMS (ESI)  $m/z$ :  $[\text{M}+\text{Na}]^+$  Calcd for  $\text{C}_{23}\text{H}_{15}\text{ClIN}_3\text{NaO}$  533.9841; Found 533.9848.

**(Z)-3-(azidomethyl)-7-fluoro-2-(iodo(phenyl)methylene)-3-phenyl-2,3-dihydro-1H-inden-1-one (6k, major)**

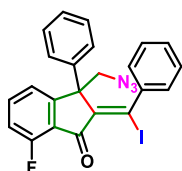

Isolation by column chromatography (PE/EA= 60/1 v/v) Pale yellow solid; 51 mg, 52% yield,  $Z/E = 10:1$ ; mp: 165-166°C;  $^1\text{H}$  NMR (400 MHz,  $\text{CDCl}_3$ ) ( $\delta$ , ppm) 7.55 – 7.50 (m, 1H), 7.40 – 7.38 (m, 5H), 7.34 – 7.28 (m, 5H), 7.04 – 7.00 (m, 1H), 6.95 (d,  $J = 7.6$  Hz, 1H), 5.05 (d,  $J = 11.6$  Hz, 1H), 4.28 (d,  $J = 11.6$  Hz, 1H).  $^{13}\text{C}$  NMR (100 MHz,  $\text{CDCl}_3$ ) ( $\delta$ , ppm) 184.2, 159.5 ( $^1J_{\text{CF}} = 247.7$  Hz), 157.2, 145.9, 145.1, 141.2, 137.1 ( $^3J_{\text{CF}} = 8.3$  Hz), 129.1, 128.9, 128.6, 128.2, 127.9, 127.5, 127.4, 126.6, 120.9 ( $^4J_{\text{CF}} = 4.1$  Hz), 120.3, 115.6 ( $^2J_{\text{CF}} = 18.9$  Hz), 57.7, 55.9.  $^{19}\text{F}$  NMR (282 MHz,  $\text{CDCl}_3$ )  $\delta$  ppm: -114.54. HRMS (ESI)  $m/z$ :  $[\text{M}+\text{Na}]^+$  Calcd for  $\text{C}_{23}\text{H}_{15}\text{FIN}_3\text{NaO}$  518.0137; Found 518.0143.

maxiaoming16  
yhf-1

8.147  
8.128  
7.919  
7.901  
7.882  
7.688  
7.677  
7.659  
7.589  
7.560  
7.543  
7.525  
7.469  
7.445  
7.400

3.741  
3.710  
3.476  
3.445

1.459

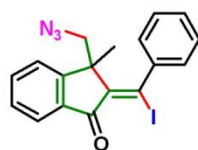

Z configuration

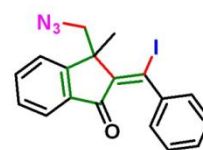

E configuration

Z/E= 4: 1

<sup>1</sup>H NMR, CDCl<sub>3</sub>, 400 HMz

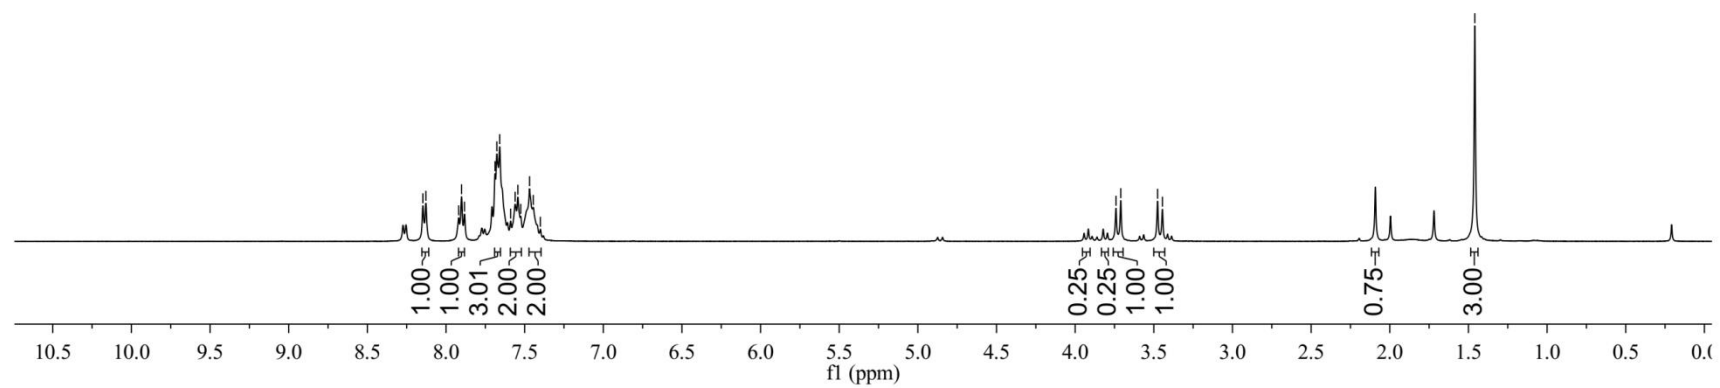

<sup>1</sup>H NMR Spectrum of Compound 4a

YHF-1

—190.29

—152.75  
—144.93  
—142.27  
—137.24  
—135.73  
—130.23  
—128.79  
—128.56  
—124.72  
—122.58

—105.84

{ 77.25  
—77.04  
76.83 }

—59.08

—51.28

—25.21

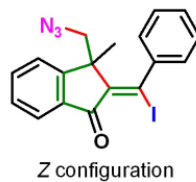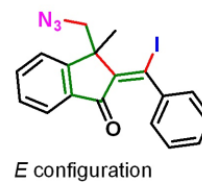

Z/E= 4: 1  
<sup>13</sup>C NMR, CDCl<sub>3</sub>, 150MHz

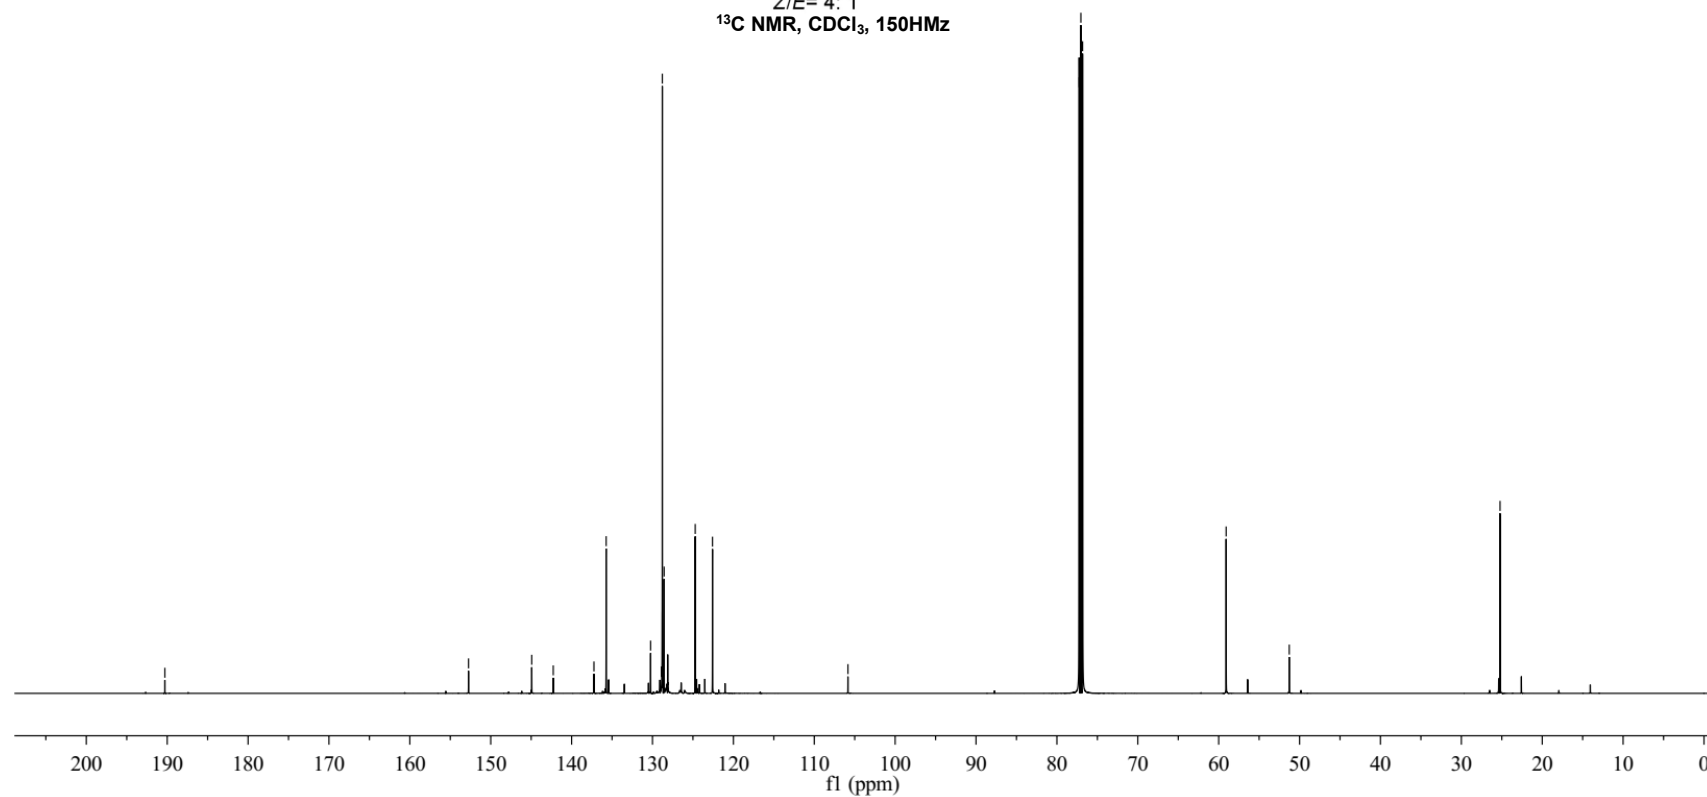

<sup>13</sup>C NMR Spectrum of Compound 4a

maxiaoming12  
yhf-q2

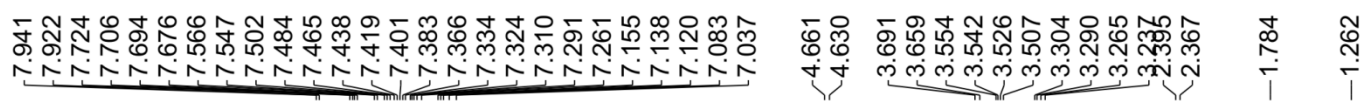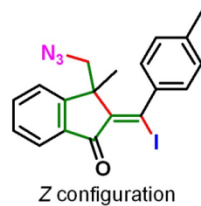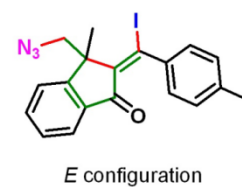

Z/E=1.5:1  
<sup>1</sup>H NMR, CDCl<sub>3</sub>, 400 HMz

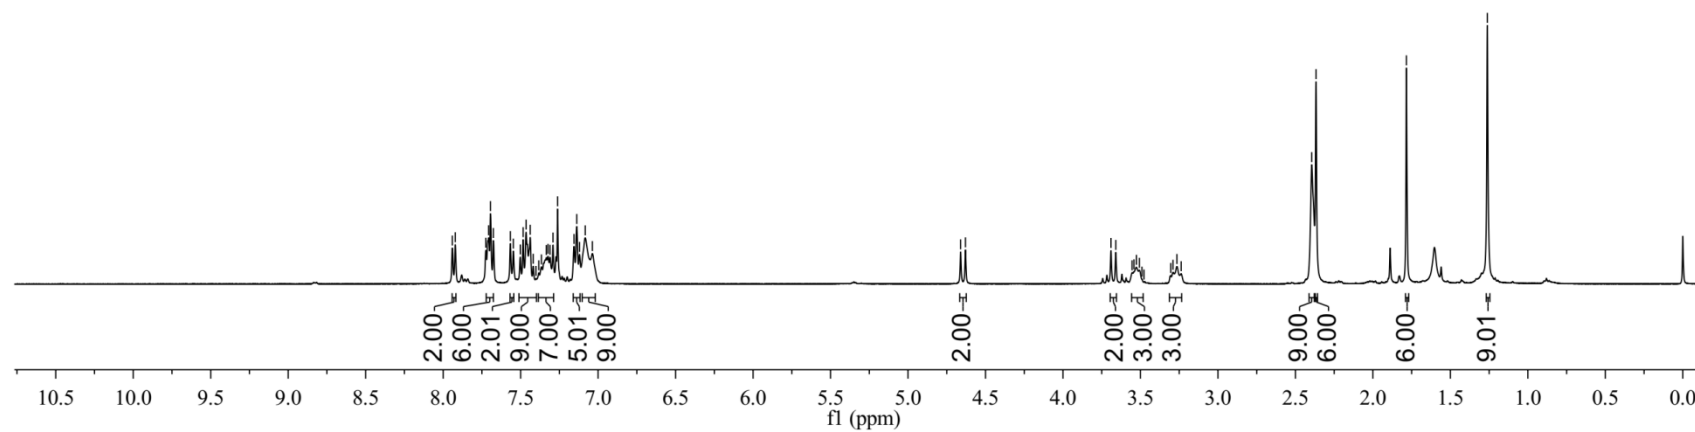

<sup>1</sup>H NMR Spectrum of Compound 4b

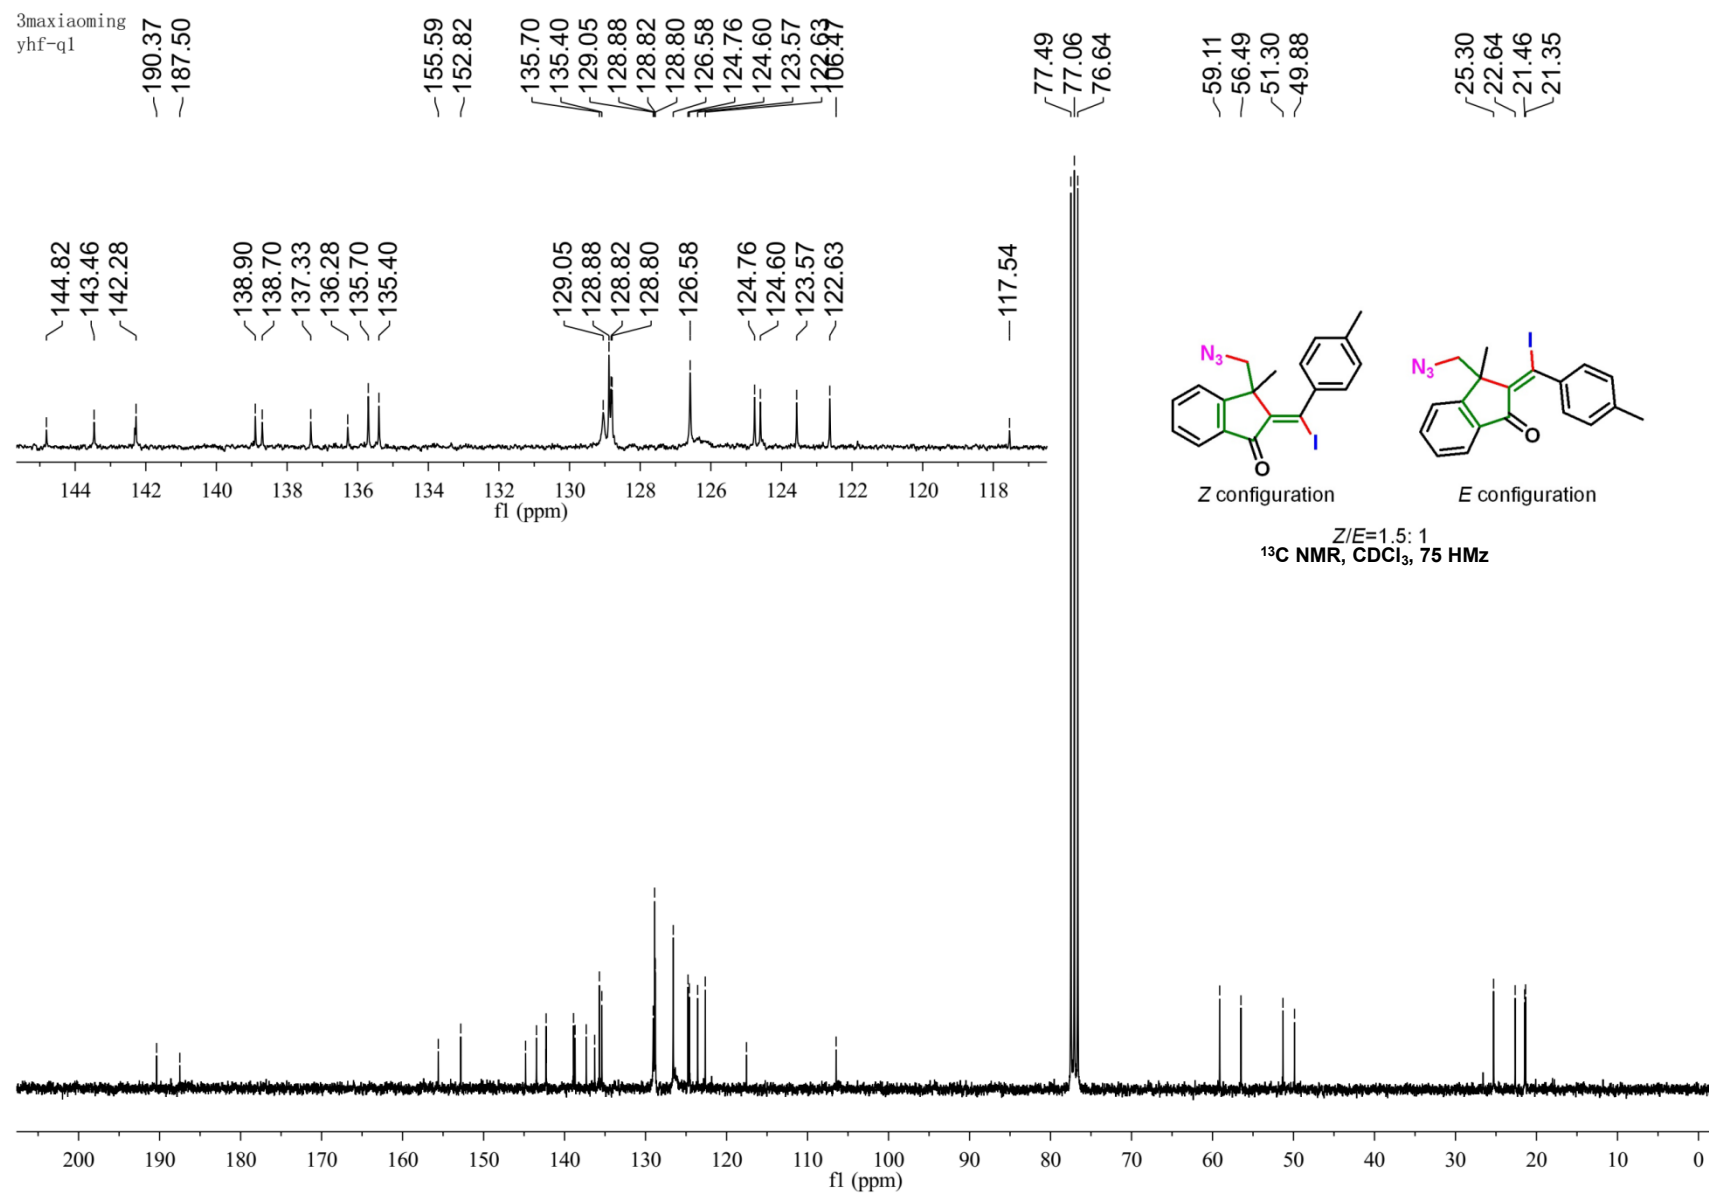

**<sup>13</sup>C NMR Spectrum of Compound 4b**

maxiaoming11.104.61  
yhf

7.939  
7.920  
7.725  
7.709  
7.693  
7.674  
7.501  
7.482  
7.469  
7.450  
7.262  
7.203  
7.186  
7.165  
7.152

3.537  
3.506  
3.300  
3.270

-2.432

-1.264

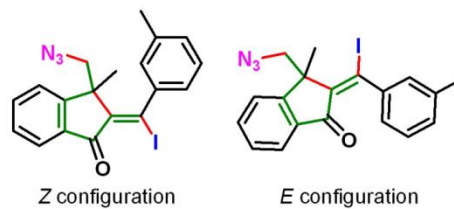

Z/E=4:1  
<sup>1</sup>H NMR, CDCl<sub>3</sub>, 400 HMz

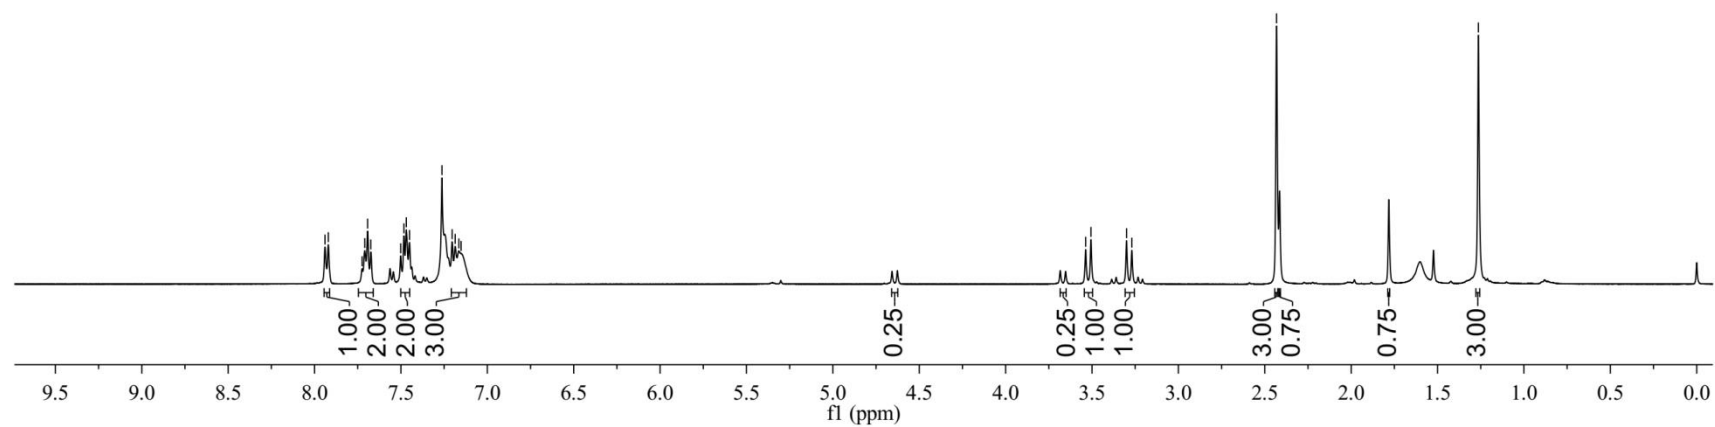

<sup>1</sup>H NMR Spectrum of Compound 4c



3maxiaoming  
yhf-q2

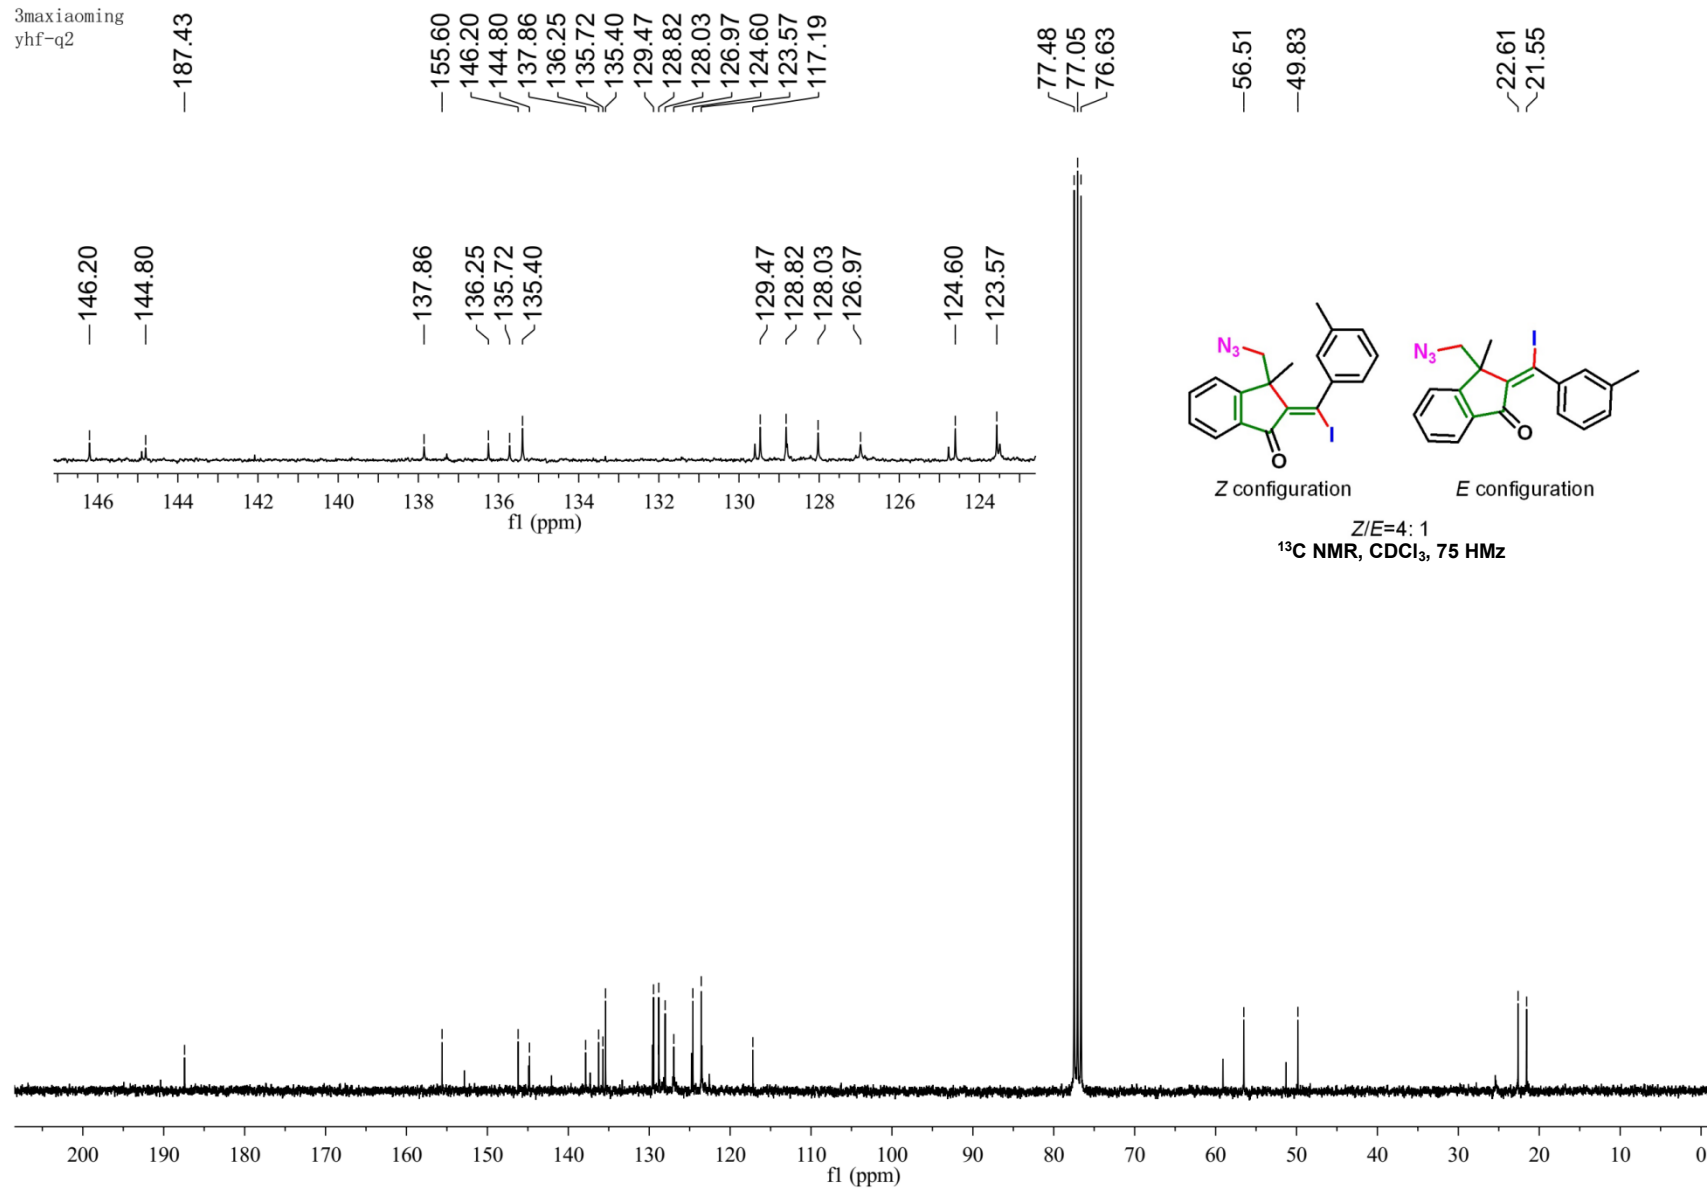

**<sup>13</sup>C NMR Spectrum of Compound 4c**

maxiaoming  
yhf-9-13

7.941  
7.922  
7.711  
7.693  
7.674  
7.502  
7.483  
7.464  
7.445  
7.264  
7.232  
7.212  
7.190  
7.174

3.535  
3.504  
3.285  
3.255

1.364  
1.256

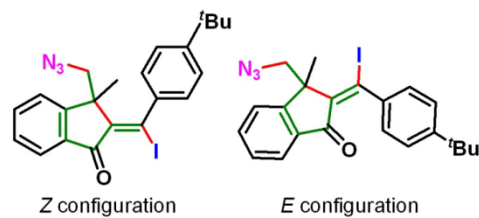

Z/E=5:1  
<sup>1</sup>H NMR, CDCl<sub>3</sub>, 400 MHz

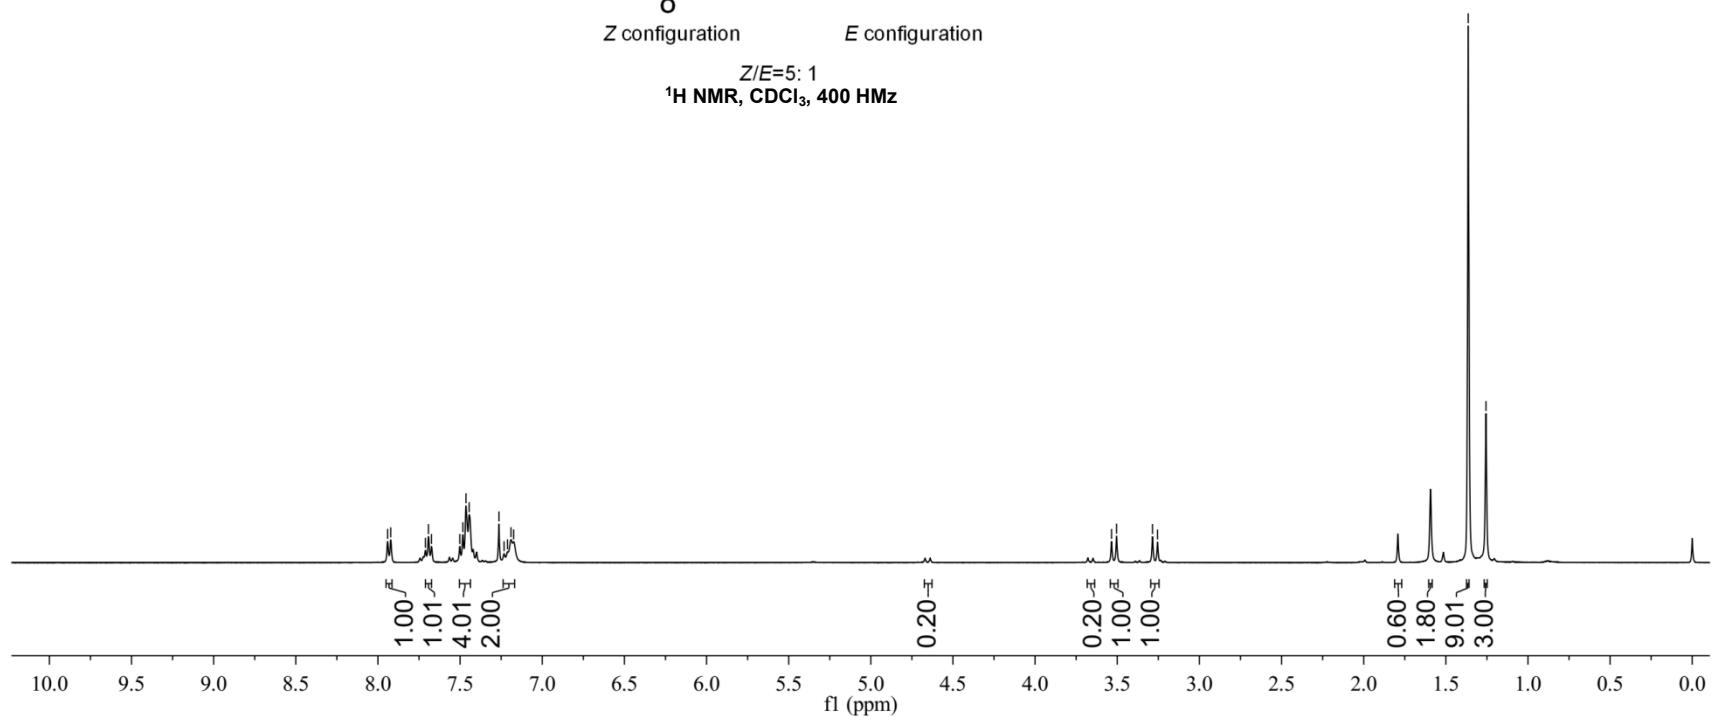

<sup>1</sup>H NMR Spectrum of Compound 4d

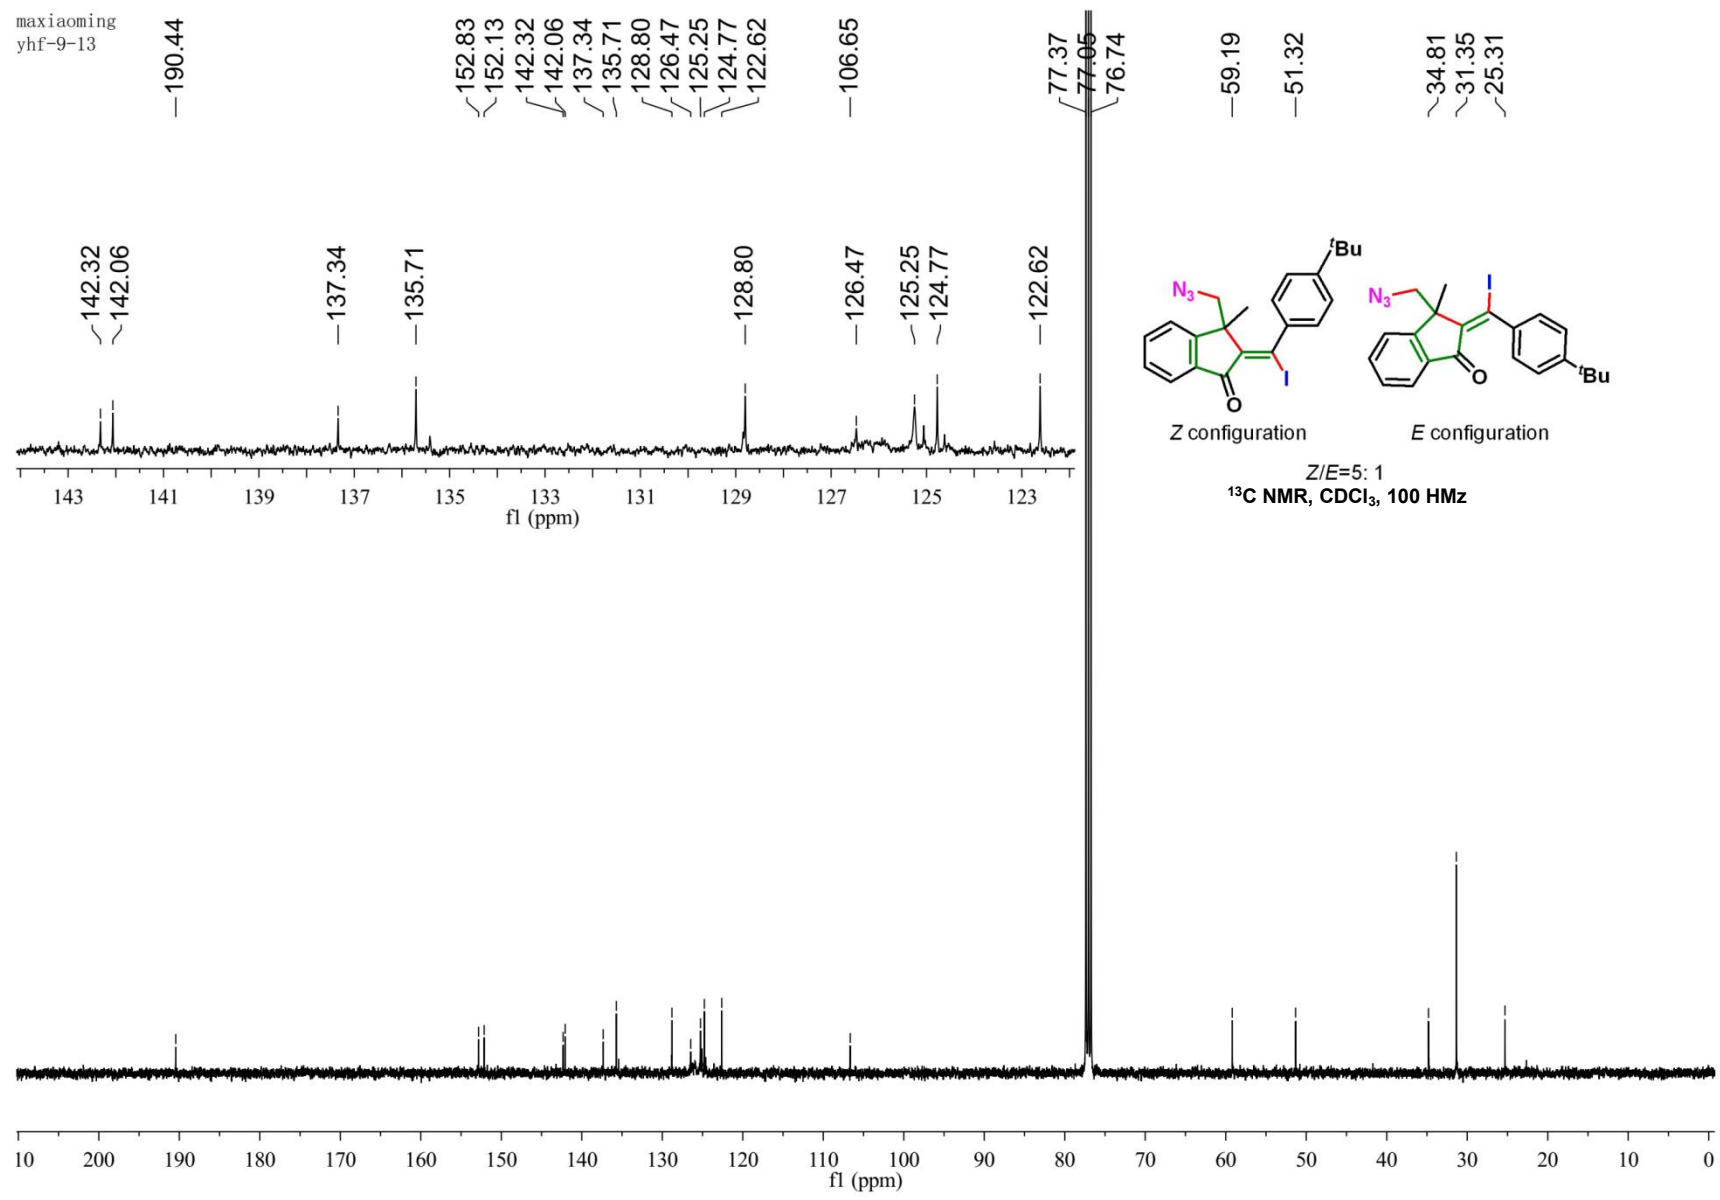

<sup>13</sup>C NMR Spectrum of Compound 4d

maxiaoming12  
yhf

7.945  
7.926  
7.732  
7.713  
7.695  
7.518  
7.499  
7.482  
7.463  
7.439  
7.264  
7.219  
7.198

3.562  
3.531  
3.255  
3.224

1.265

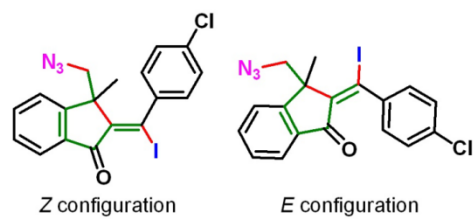

Z/E=5:1  
<sup>1</sup>H NMR, CDCl<sub>3</sub>, 400 MHz

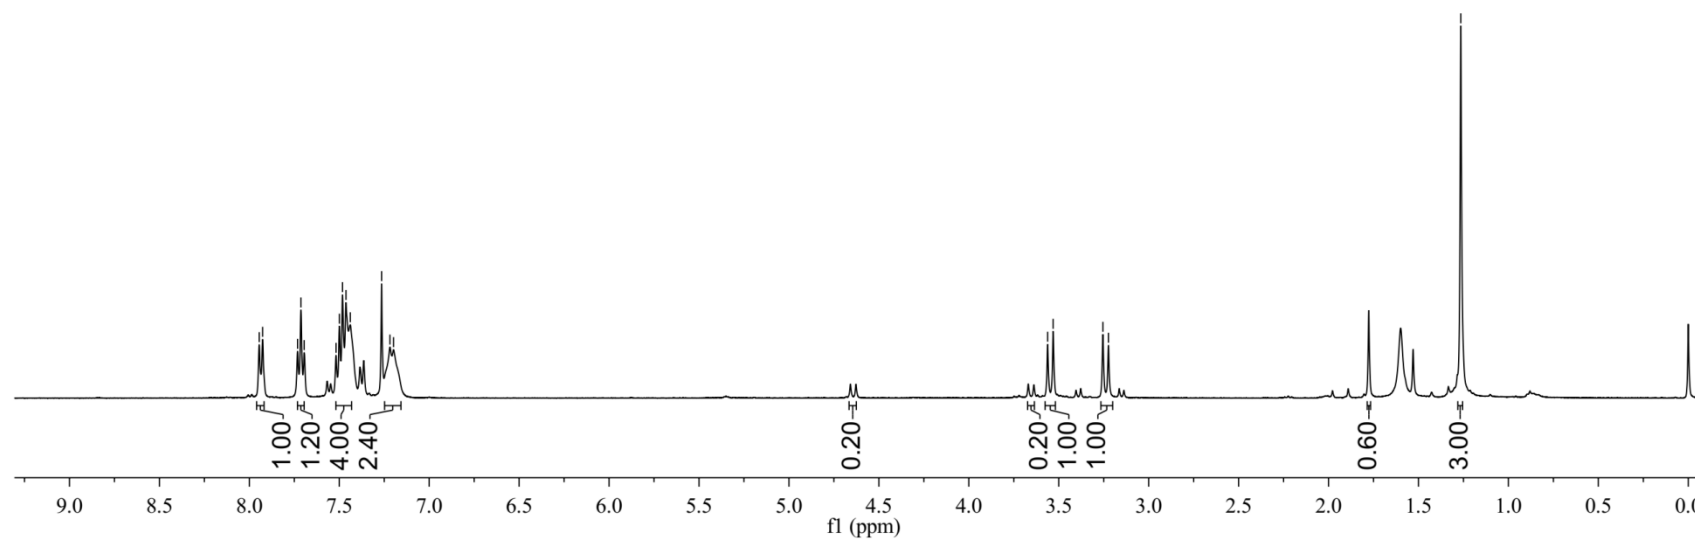

<sup>1</sup>H NMR Spectrum of Compound 4e

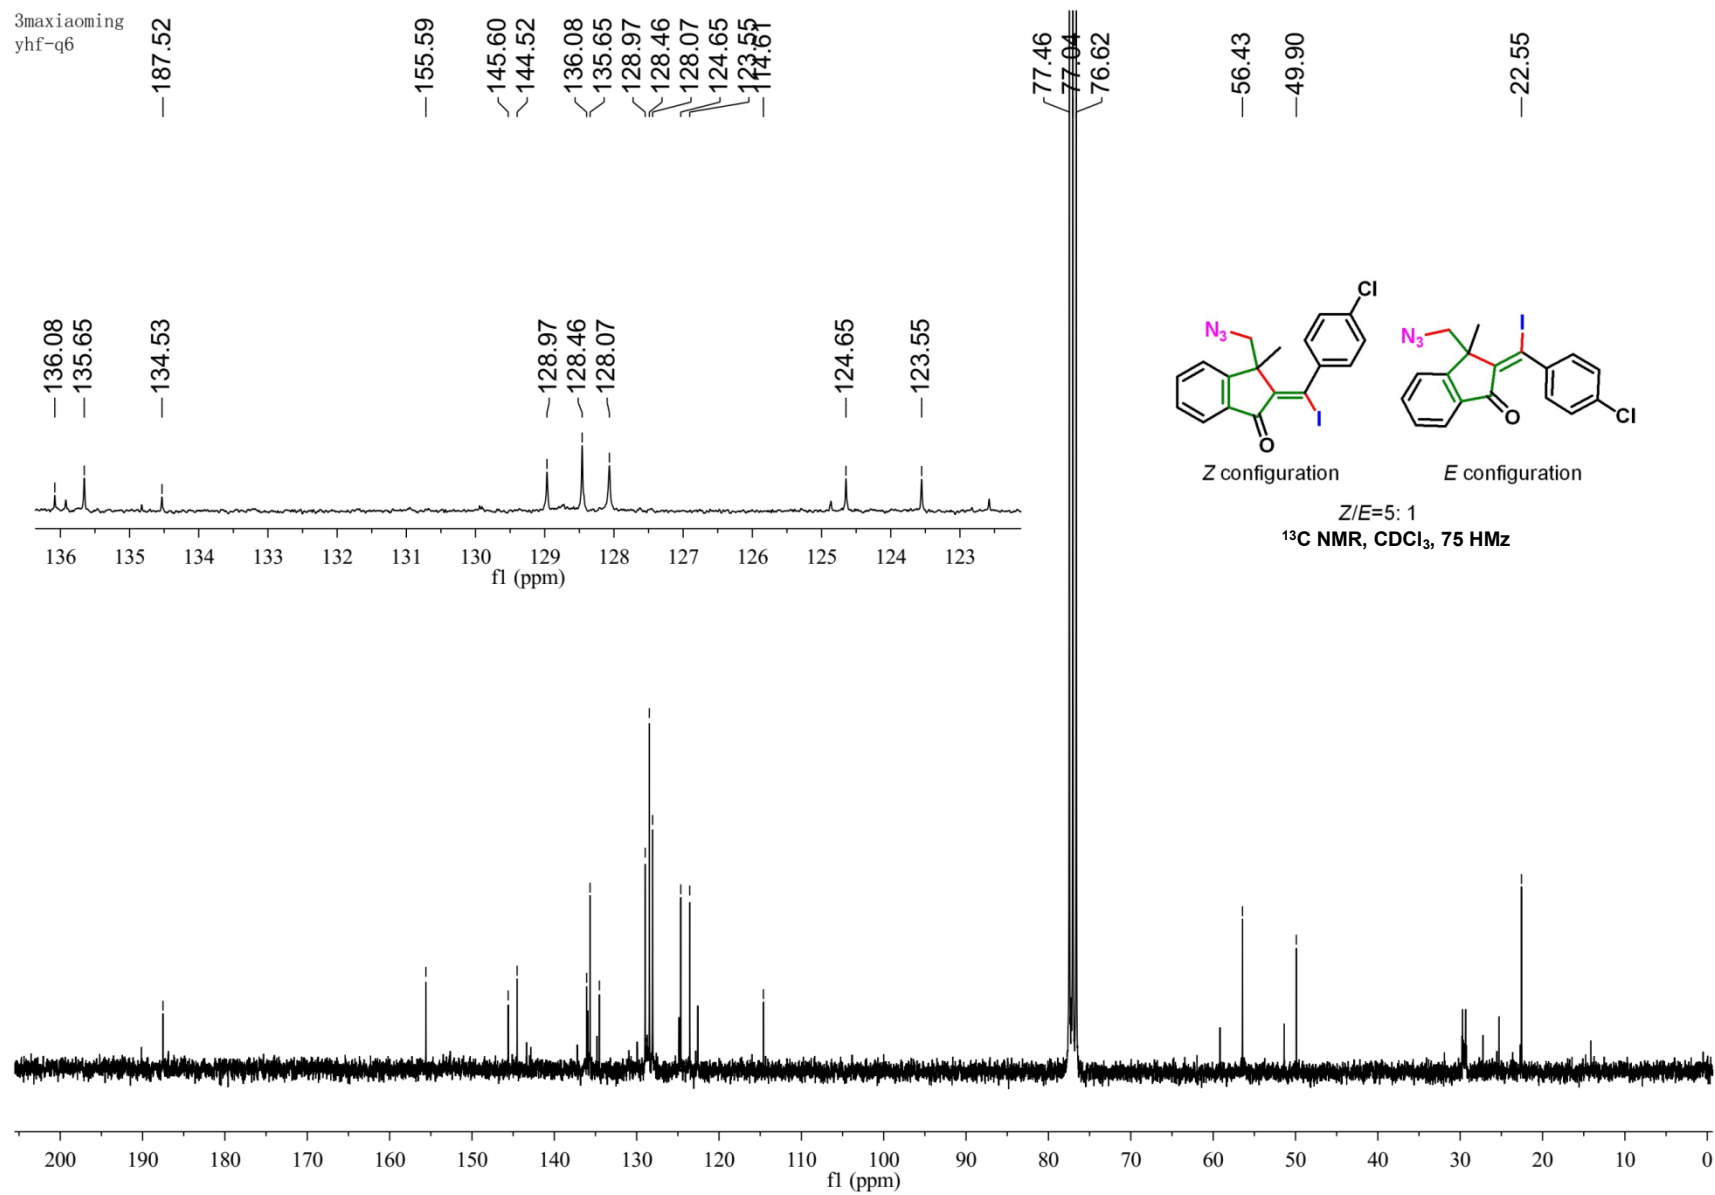

<sup>13</sup>C NMR Spectrum of Compound 4e

maxiaoming12  
yhfq-8

7.945  
7.926  
7.733  
7.715  
7.696  
7.599  
7.500  
7.482  
7.463  
7.265  
7.201  
7.155  
7.128  
7.084

3.563  
3.532  
3.258  
3.227

—1.266

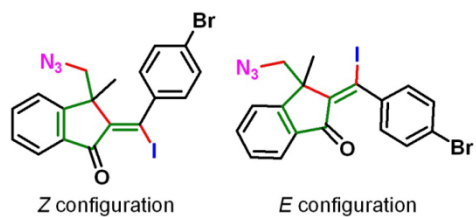

Z/E=10: 1  
<sup>1</sup>H NMR, CDCl<sub>3</sub>, 400 HMz

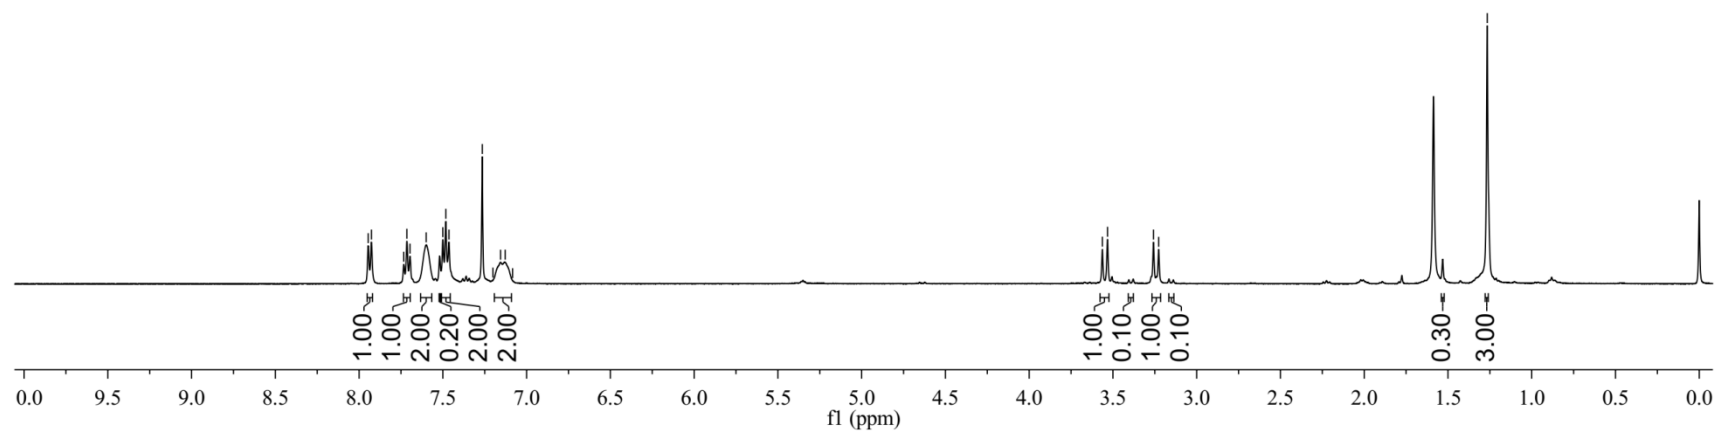

<sup>1</sup>H NMR Spectrum of Compound 4f

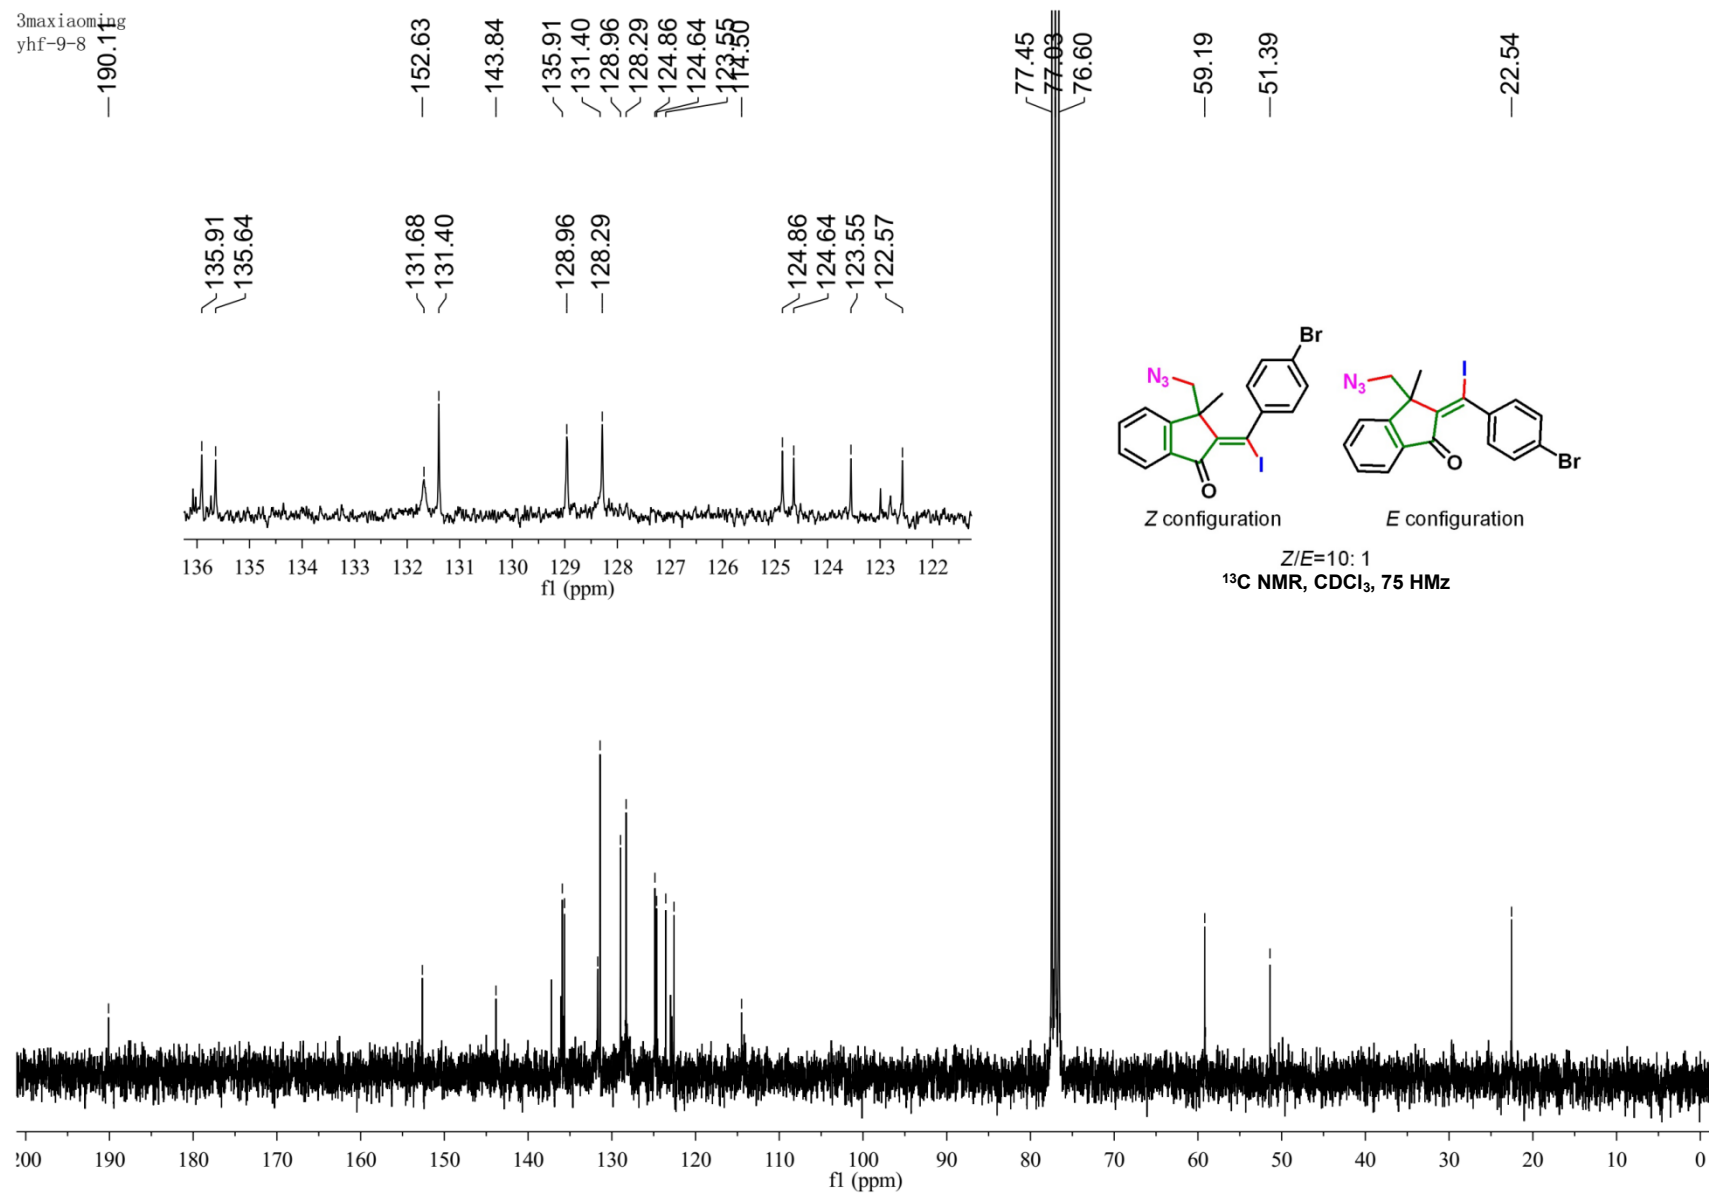

<sup>13</sup>C NMR Spectrum of Compound 4f

8.134  
 8.098  
 8.077  
 7.951  
 7.932  
 7.731  
 7.714  
 7.696  
 7.576  
 7.556  
 7.521  
 7.502  
 7.474  
 7.454  
 7.373  
 7.353  
 7.320  
 7.266

4.657  
 4.626  
 3.968  
 3.935  
 3.691  
 3.660  
 3.537  
 3.506  
 3.227  
 3.196

— 1.790

— 1.243

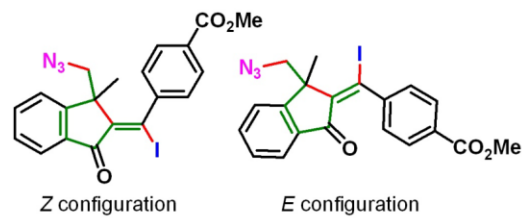

Z/E=1:1

<sup>1</sup>H NMR, CDCl<sub>3</sub>, 400 HMz

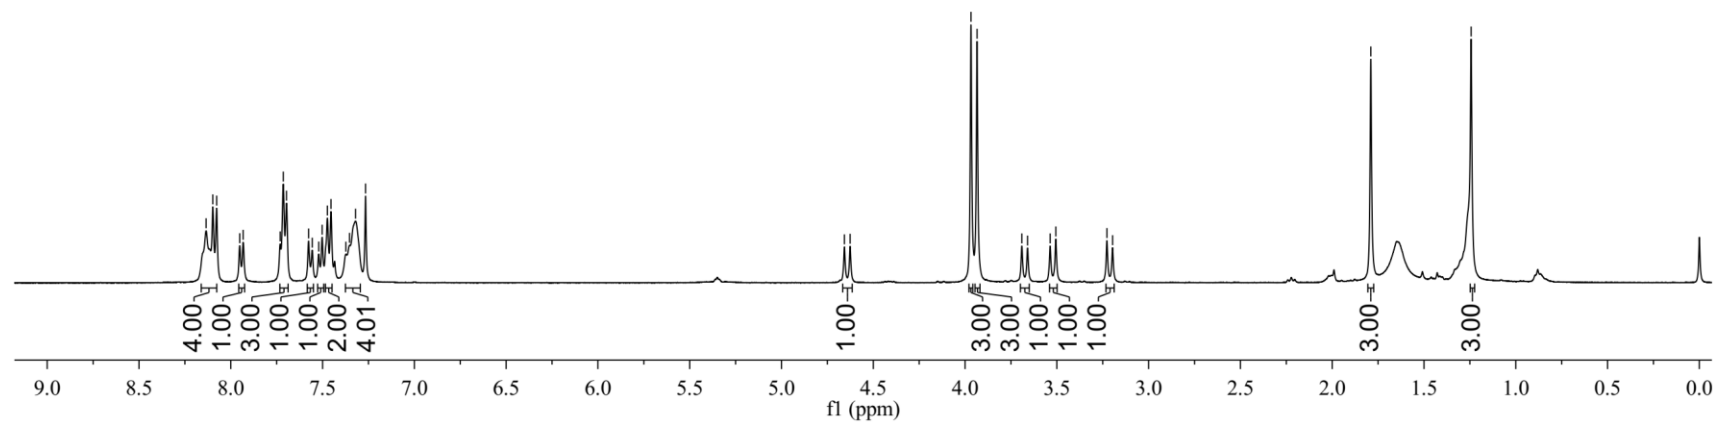

<sup>1</sup>H NMR Spectrum of Compound 4g



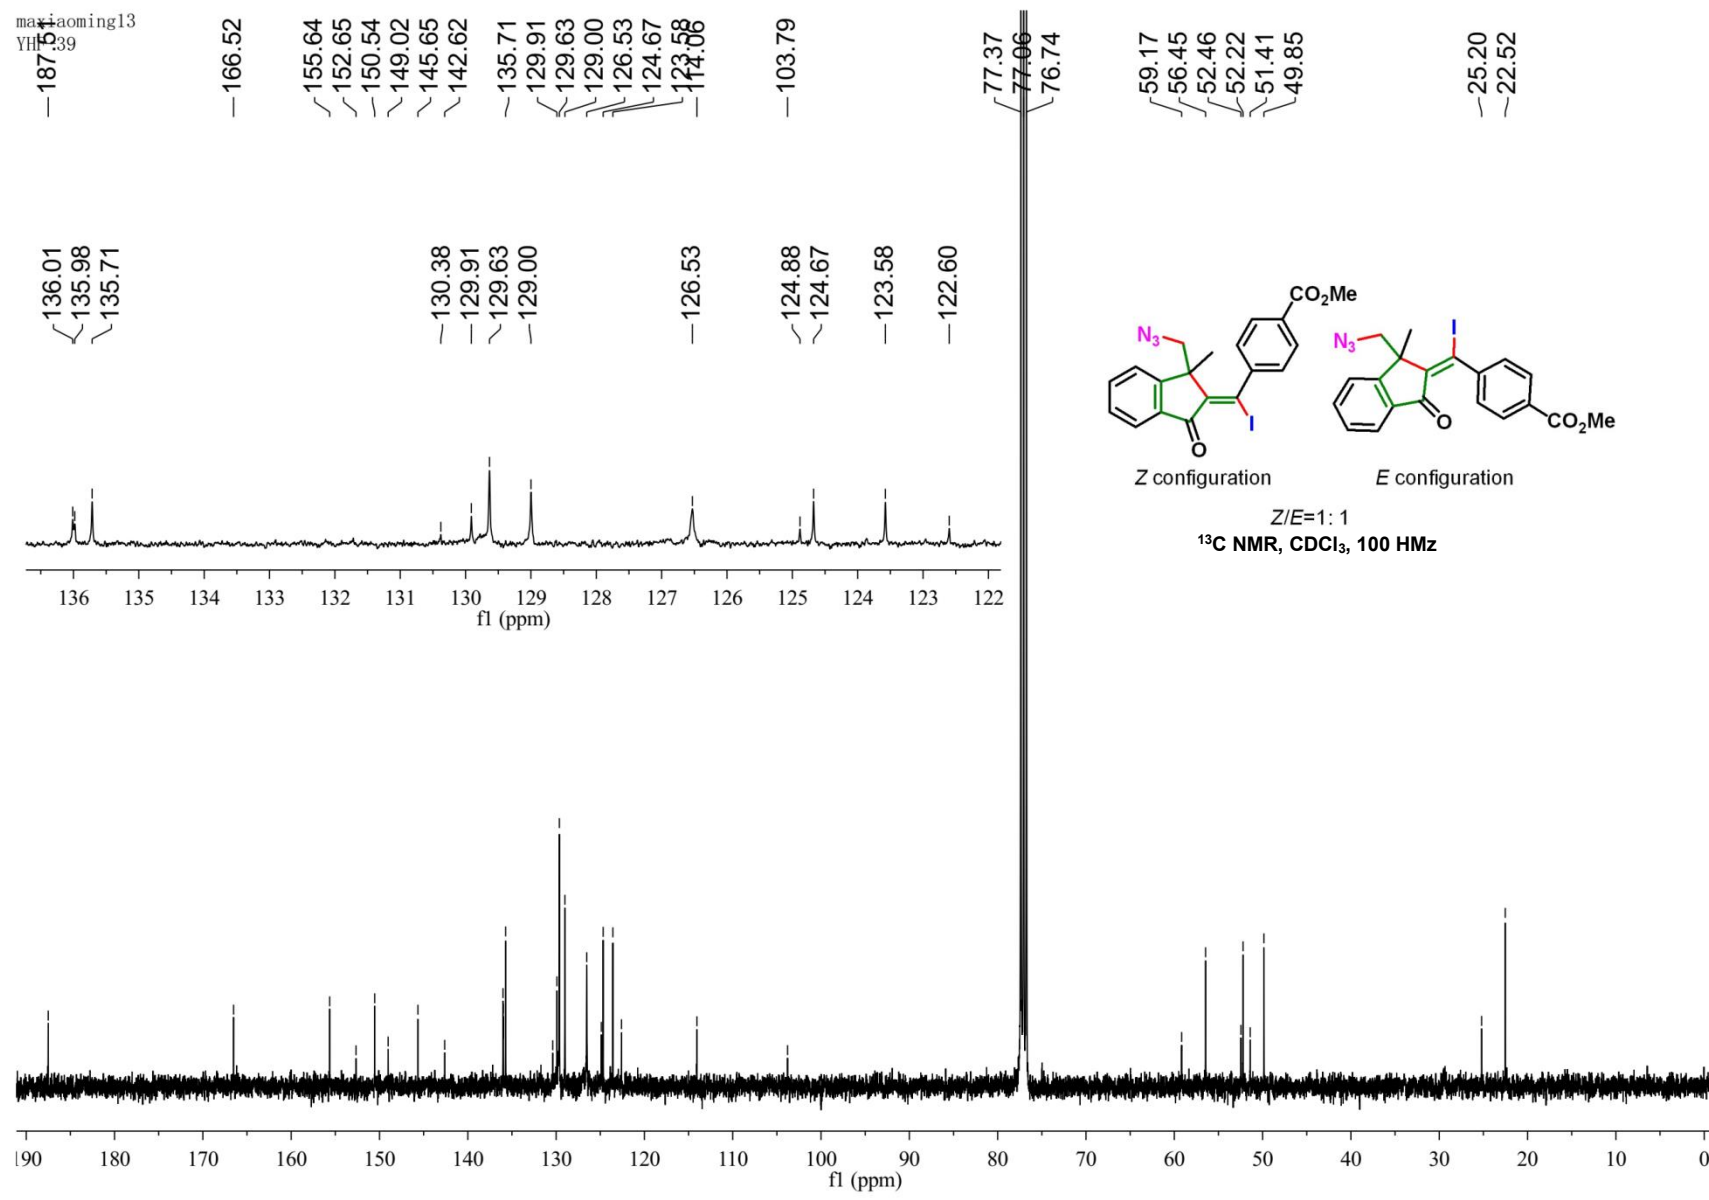

**<sup>13</sup>C NMR Spectrum of Compound 4g**

maxiaoming12  
yhf45

7.870  
7.851  
7.555  
7.503  
7.486  
7.427  
7.392  
7.374  
7.355  
7.335  
7.315  
7.304  
7.277  
7.260

3.553  
3.523  
3.296  
3.265

—2.510

—1.275

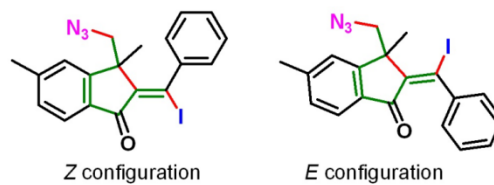

Z/E=4:1  
<sup>1</sup>H NMR, CDCl<sub>3</sub>, 400 HMz

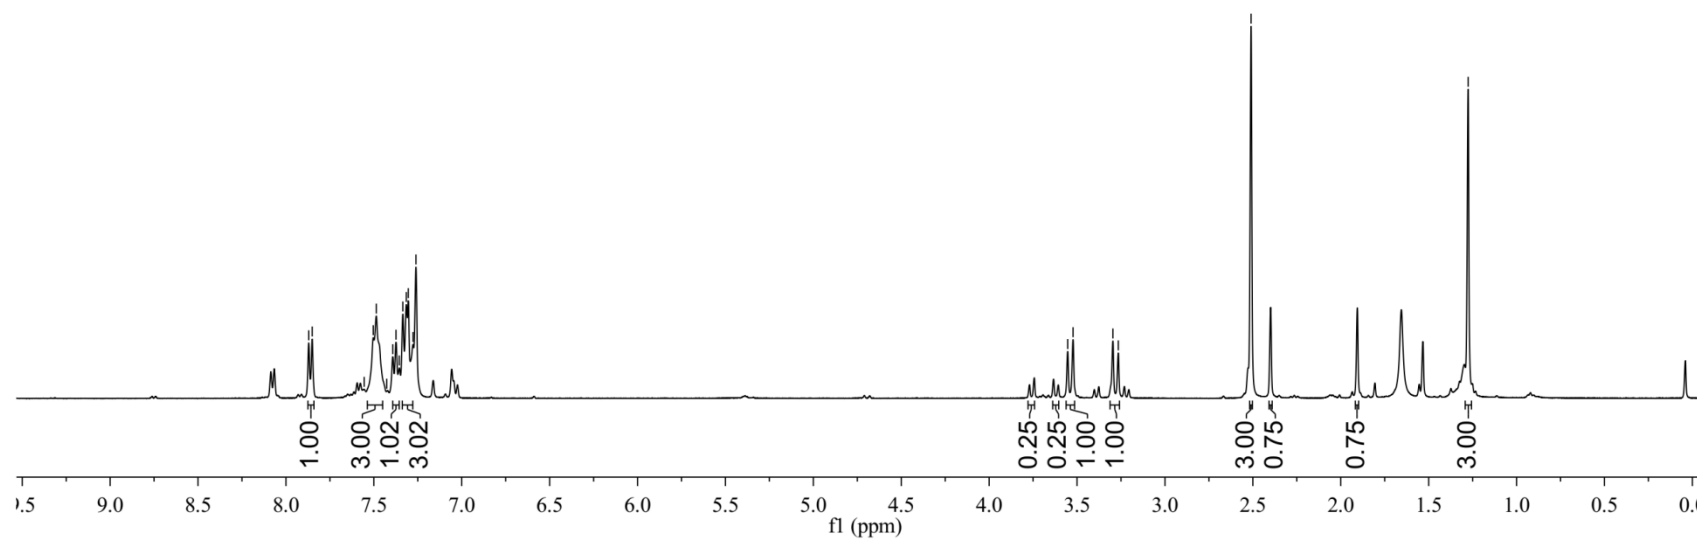

<sup>1</sup>H NMR Spectrum of Compound 4h

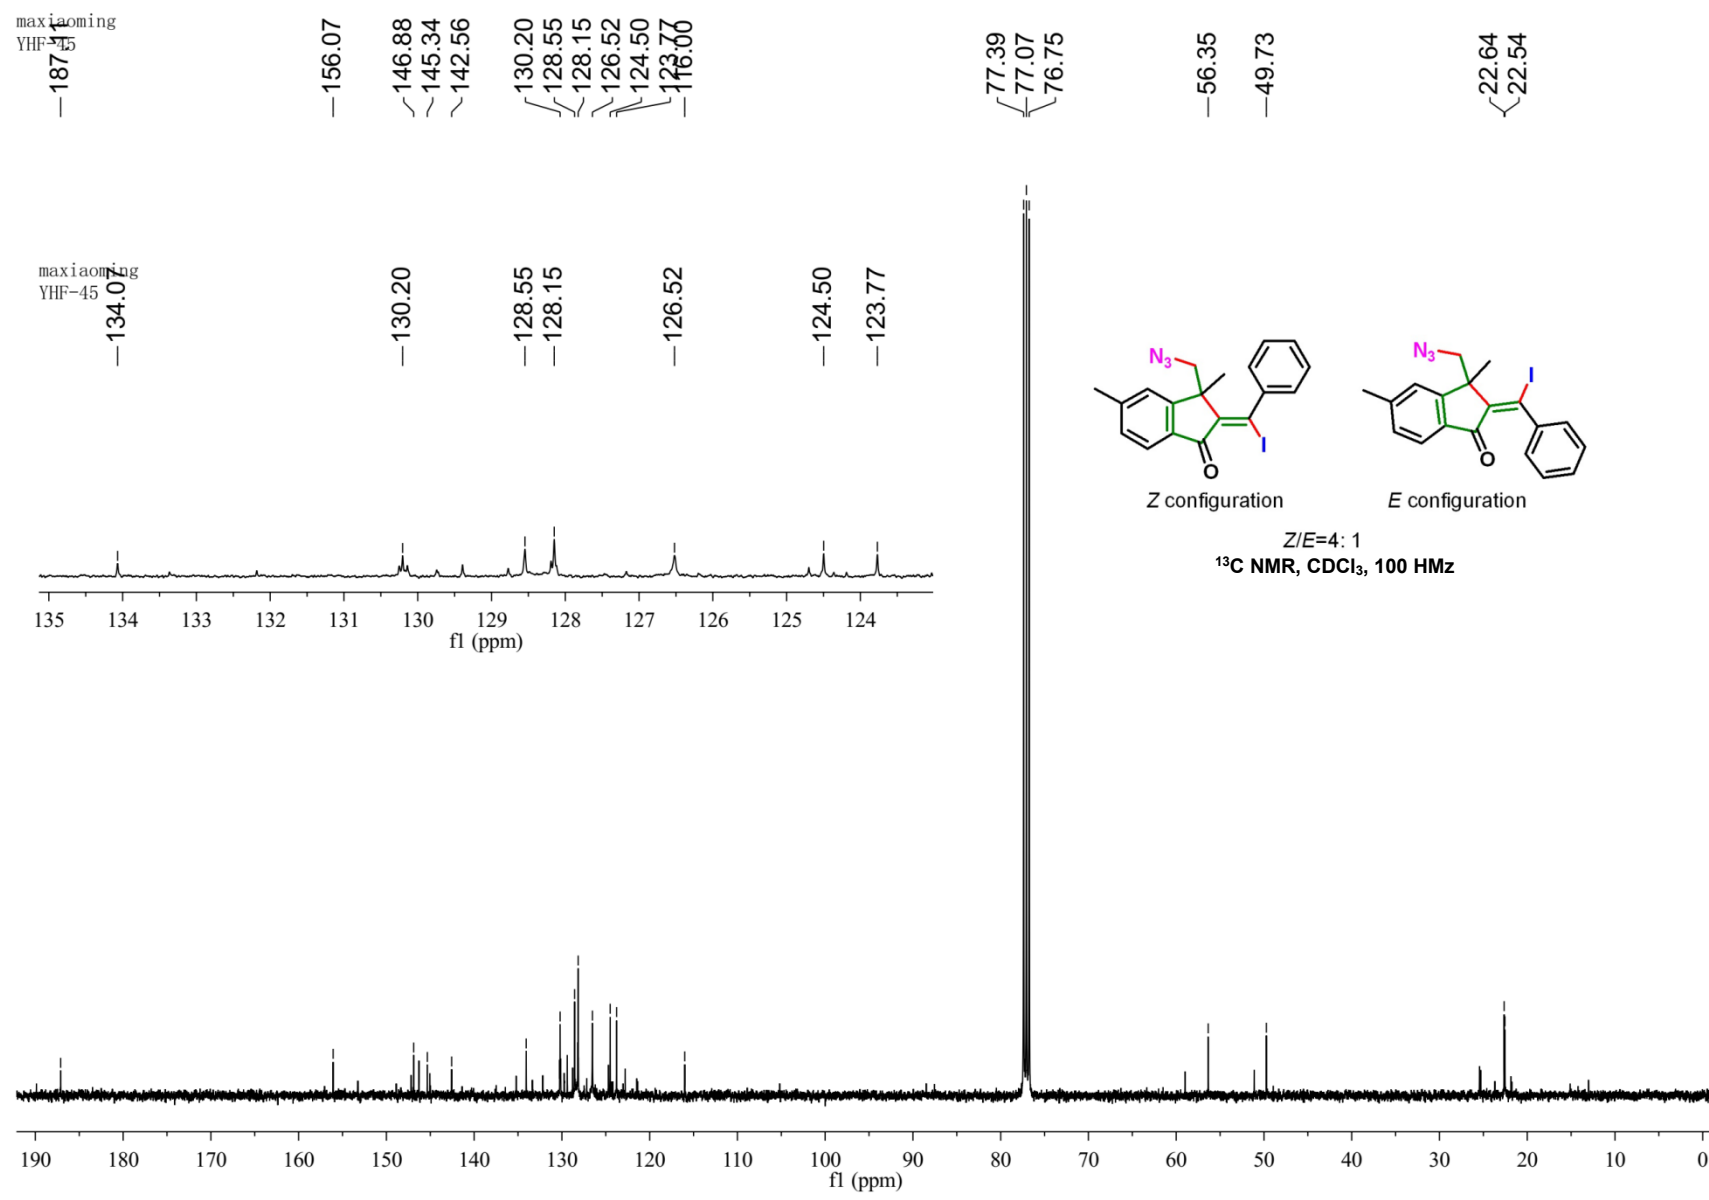

<sup>13</sup>C NMR Spectrum of Compound 4h

maxiaoming  
yhf-9-14

7.965  
7.952  
7.945  
7.931  
7.453  
7.409  
7.390  
7.366  
7.347  
7.328  
7.264  
7.203  
7.198  
7.181  
7.177  
7.160  
7.155  
7.127  
7.106

3.496  
3.465  
3.288  
3.258

1.245

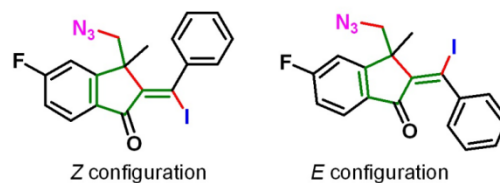

Z/E=5:1  
<sup>1</sup>H NMR, CDCl<sub>3</sub>, 400 MHz

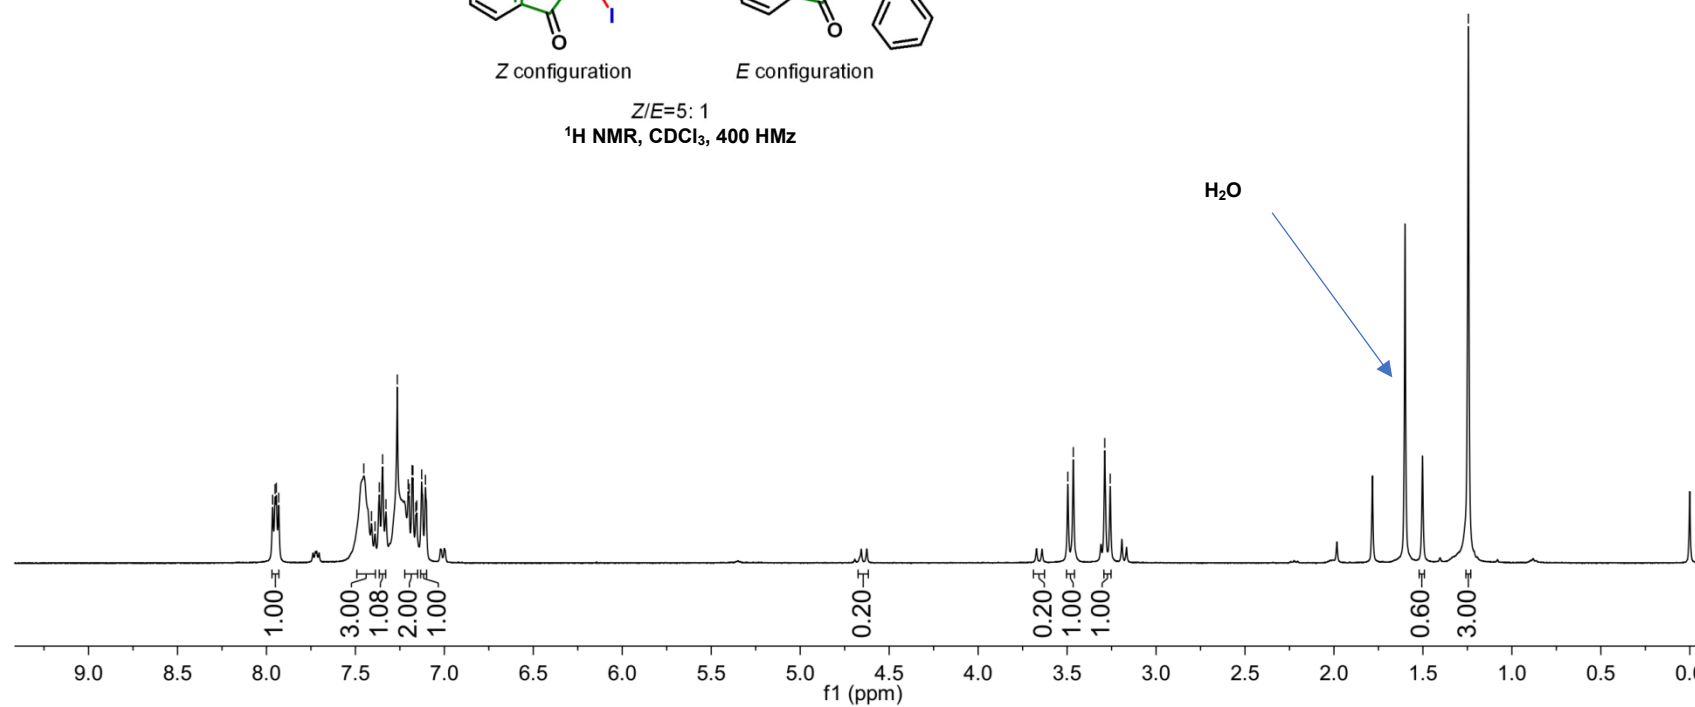

<sup>1</sup>H NMR Spectrum of Compound 4i

maxiaoming  
yhf-9-14

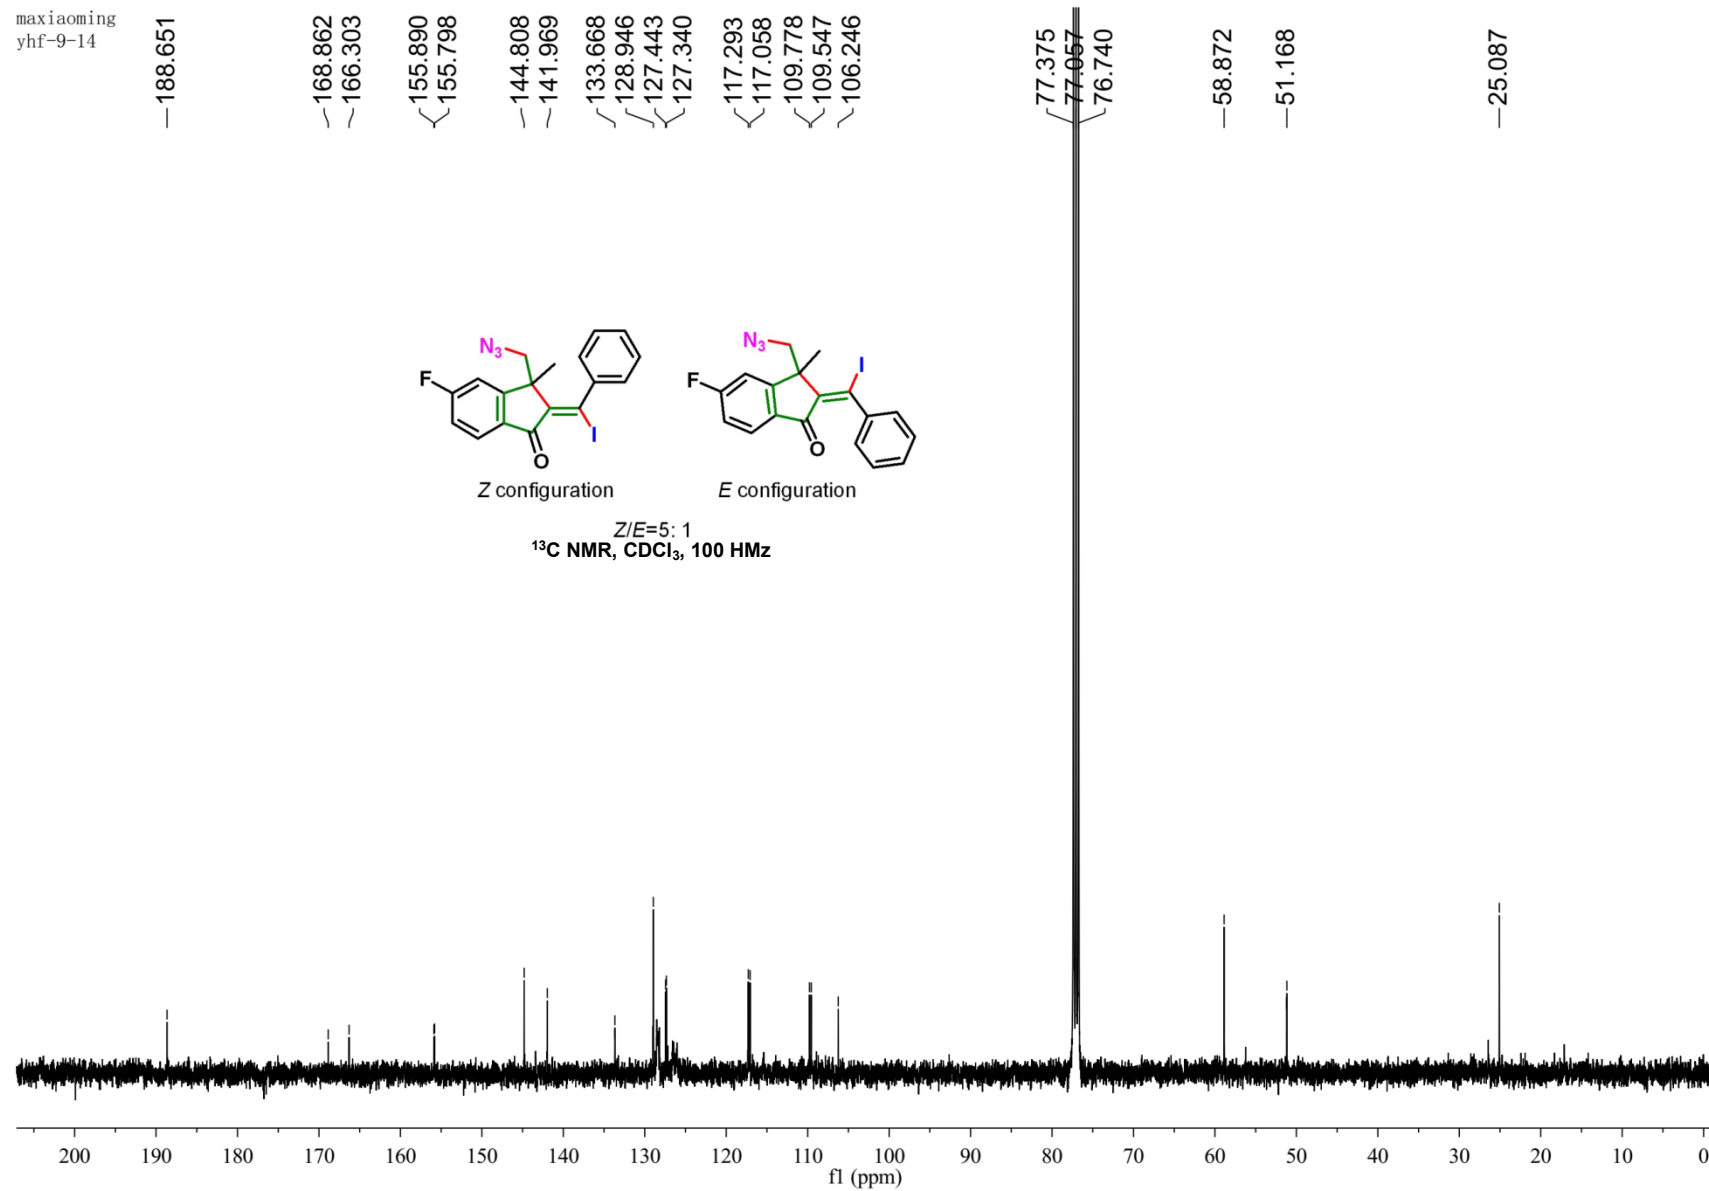

**<sup>13</sup>C NMR Spectrum of Compound 4i**

3maxiaoming  
yhf14

~99.703  
~100.054

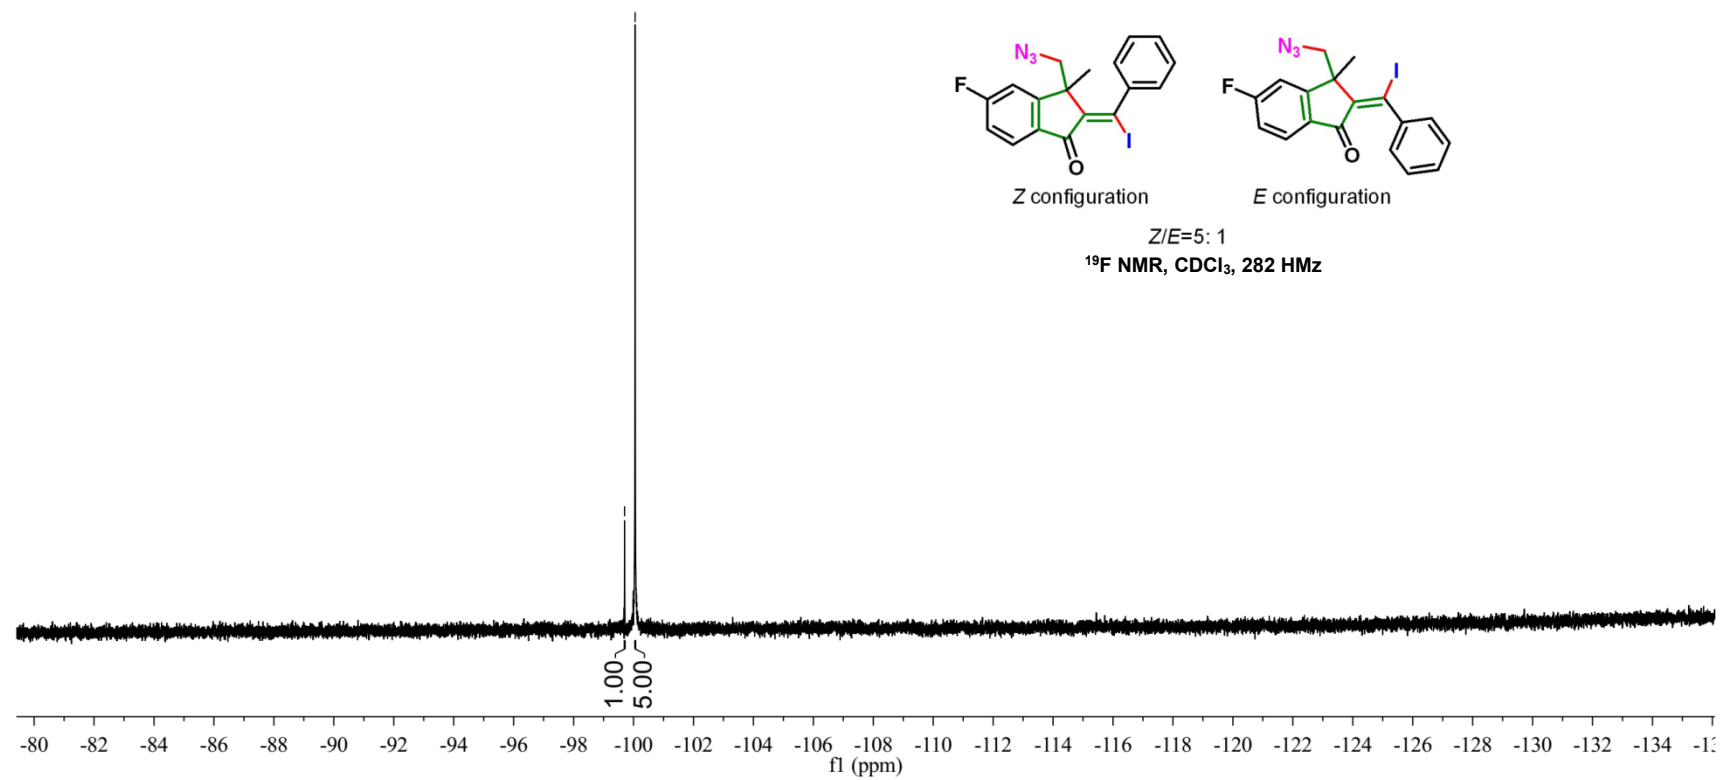

$^{19}\text{F}$  NMR Spectrum of Compound 4i

maxiaoming  
yhf-9-12

7.872  
7.869  
7.656  
7.635  
7.515  
7.492  
7.453  
7.418  
7.397  
7.367  
7.348  
7.332  
7.295  
7.264  
7.248

3.506  
3.475  
3.282  
3.252

—1.240

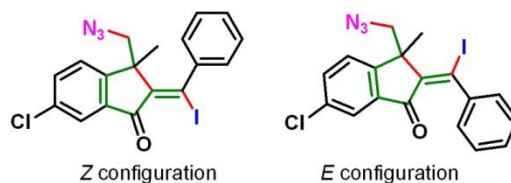

Z/E=10: 1  
<sup>1</sup>H NMR, CDCl<sub>3</sub>, 400 HMz

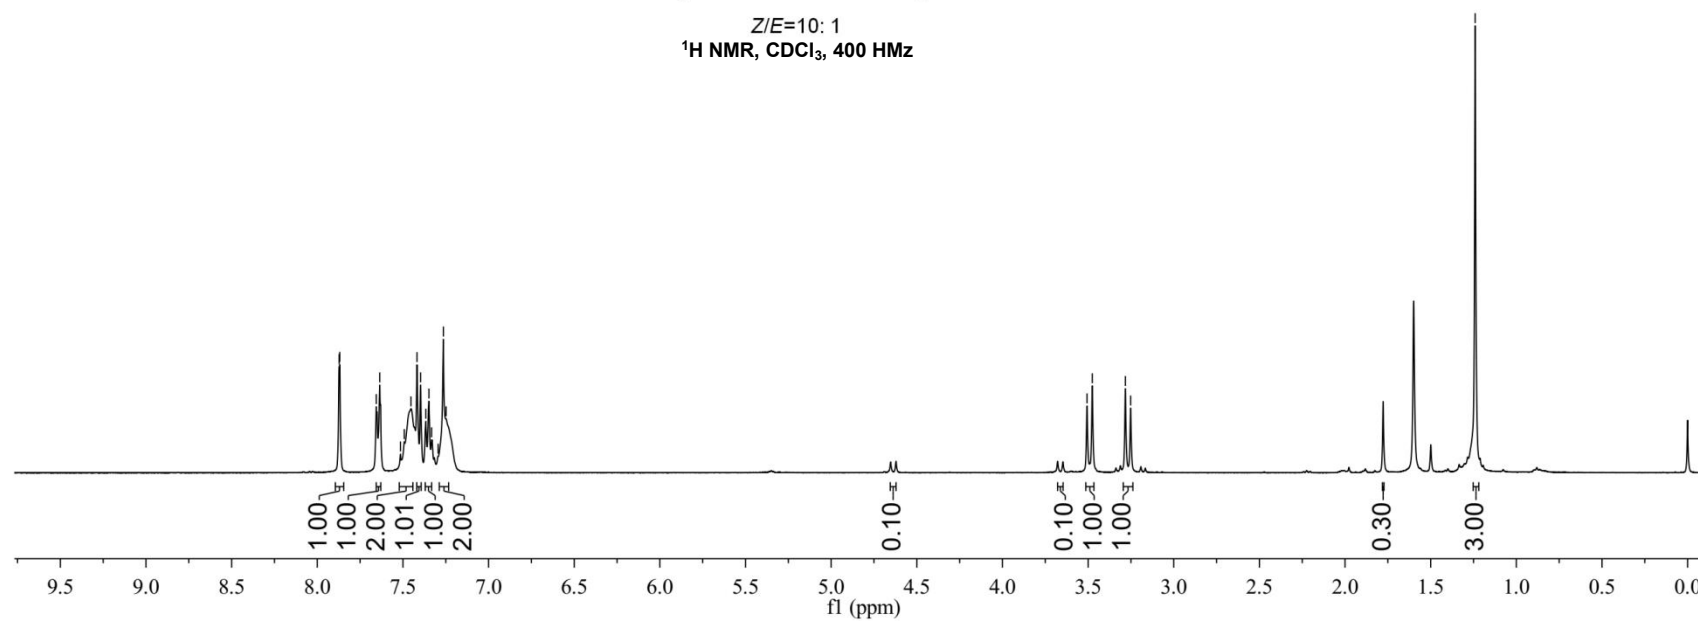

<sup>1</sup>H NMR Spectrum of Compound 4j

maxiaoqing  
yhf-9-12

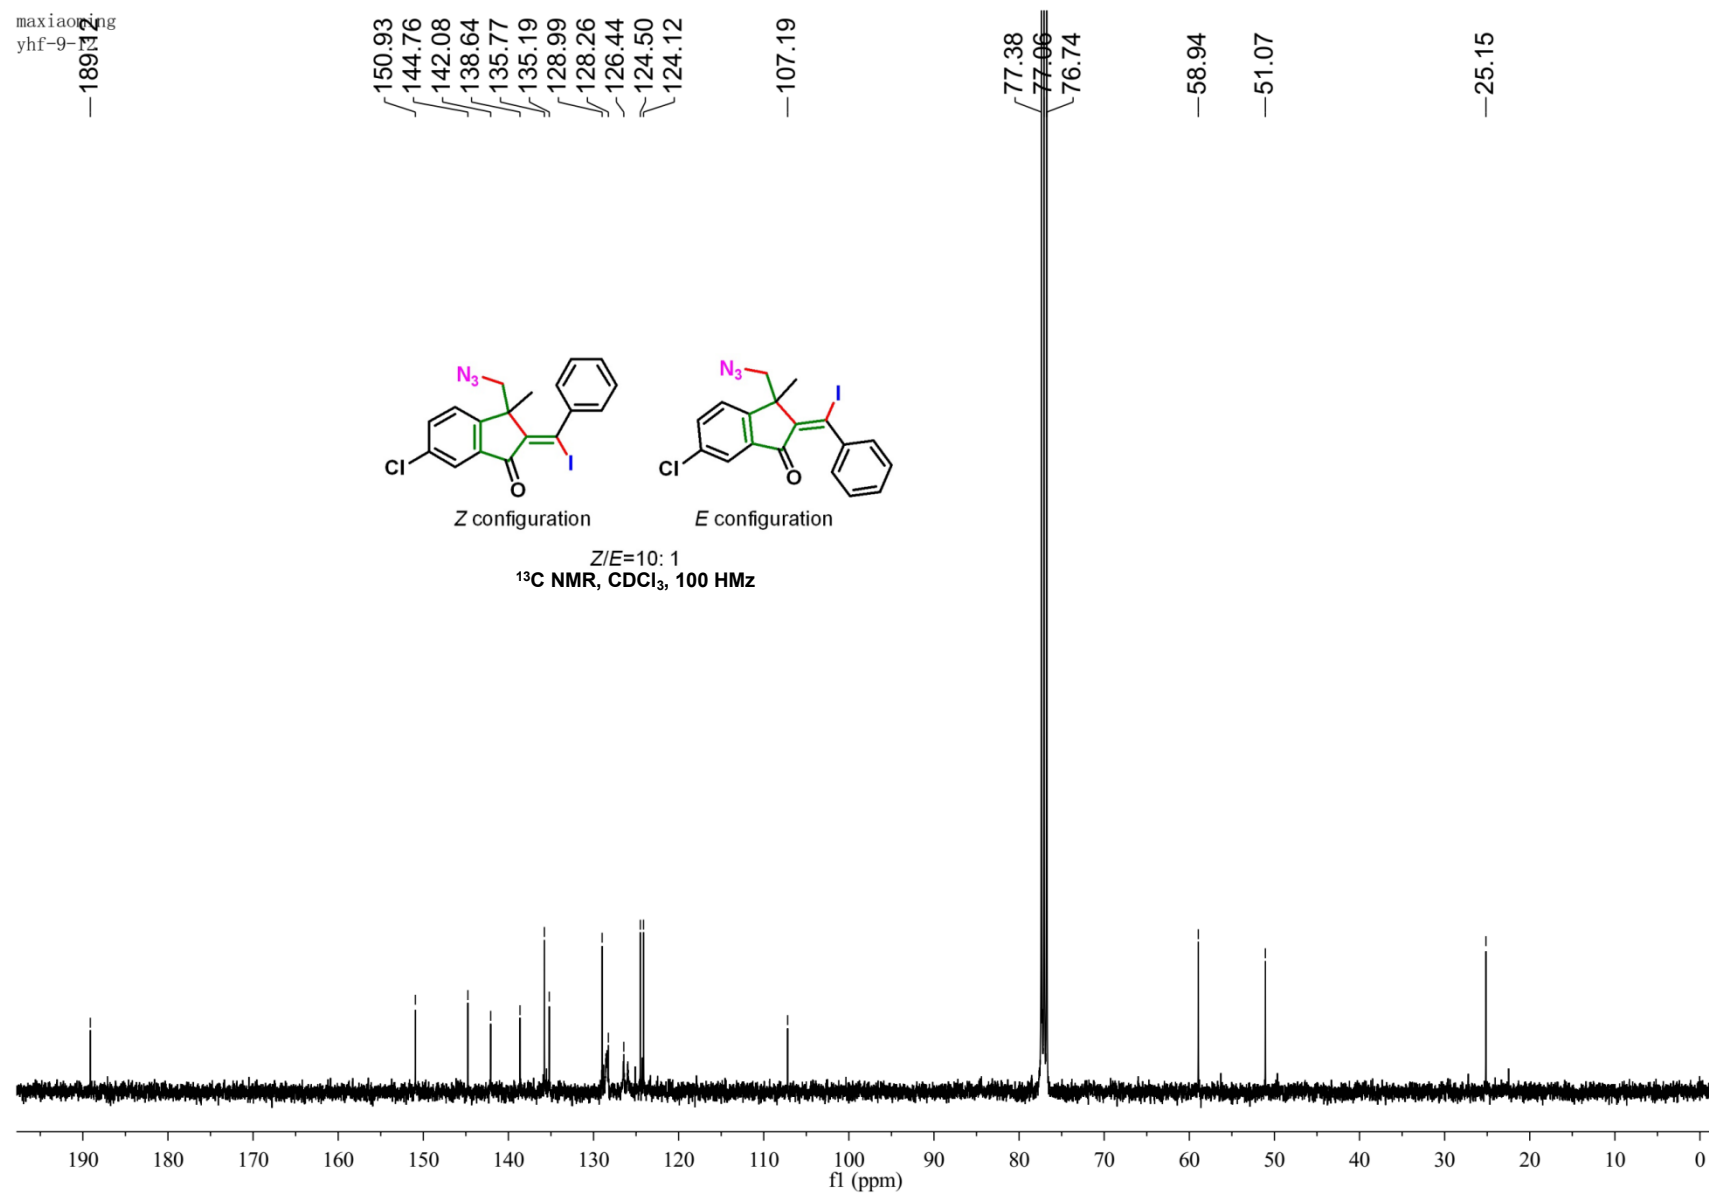

Z/E=10:1  
<sup>13</sup>C NMR, CDCl<sub>3</sub>, 100 MHz

**<sup>13</sup>C NMR Spectrum of Compound 4j**



maxiaoming13  
yhf-n

8.120  
8.115  
8.108  
7.700  
7.681  
7.659  
7.637  
7.544  
7.525  
7.459  
7.404  
7.386  
7.368  
7.262

4.278  
4.240

1.696

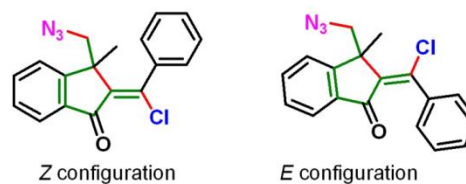

Z/E>19:1  
<sup>1</sup>H NMR, CDCl<sub>3</sub>, 400 MHz

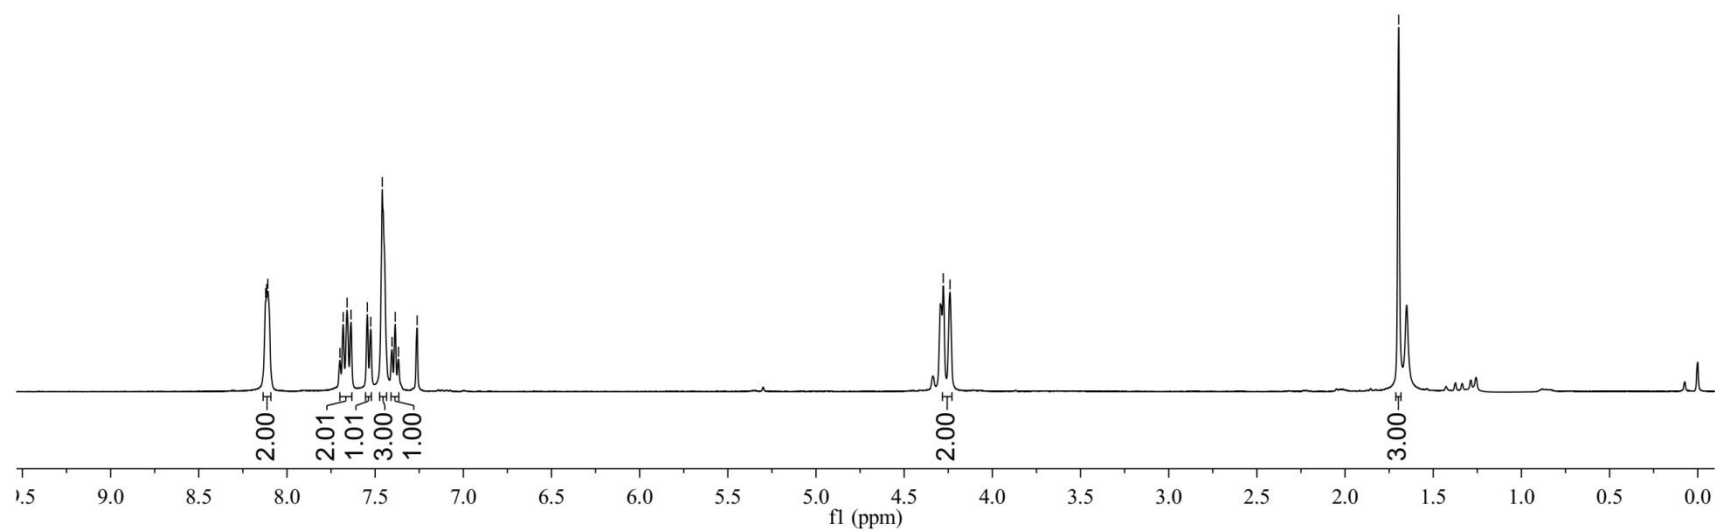

<sup>1</sup>H NMR Spectrum of Compound 4k

3maxiaoming01  
ymf-a13

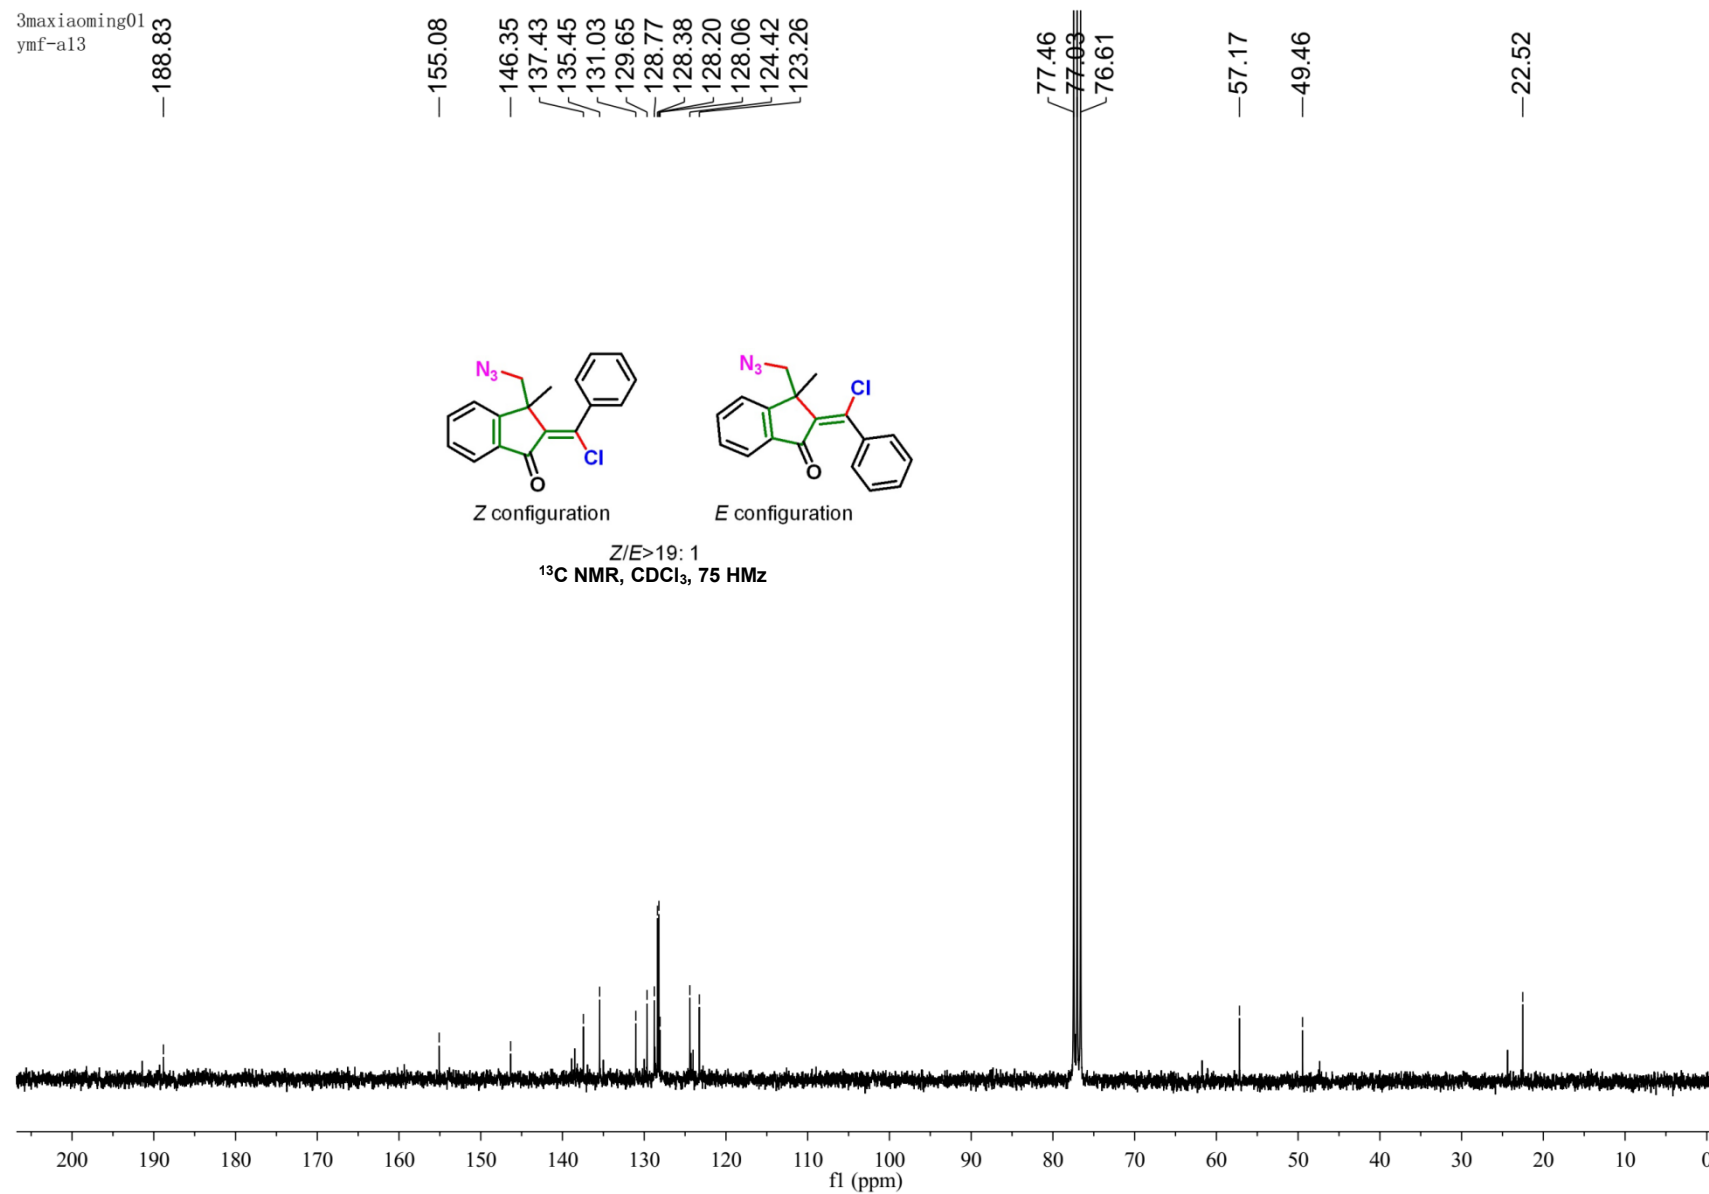

<sup>13</sup>C NMR Spectrum of Compound 4k

maxiaoming13  
yhf-nbs

7.724  
7.707  
7.691  
7.565  
7.546  
7.465  
7.446  
7.420  
7.385  
7.366  
7.260

4.712  
4.686

3.839  
3.813

— 1.928

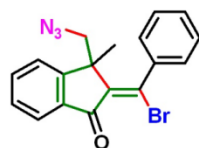

Z configuration

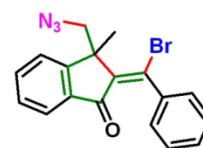

E configuration

Z/E= 10: 1

<sup>1</sup>H NMR, CDCl<sub>3</sub>, 400 MHz

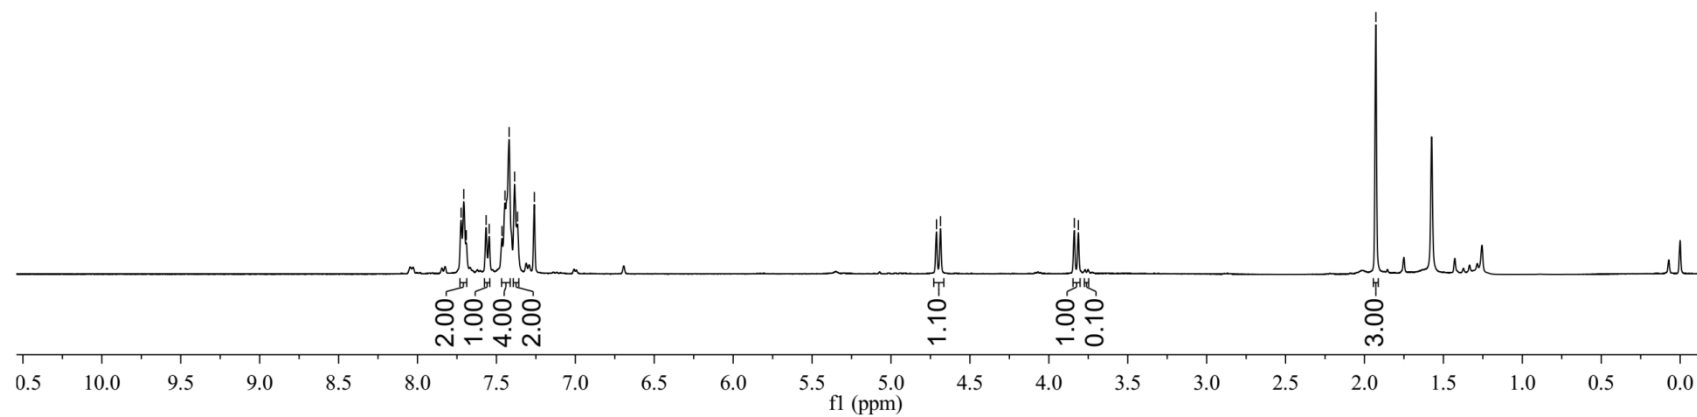

<sup>1</sup>H NMR Spectrum of Compound 4l

YHF NBS

—188.14

—155.41  
—141.19  
—140.34  
—138.45  
—137.05  
—135.47  
—129.27  
—128.78  
—128.21  
—127.90  
—124.35  
—122.80

{ 77.23  
77.02  
76.81

—49.77

—38.61

—23.83

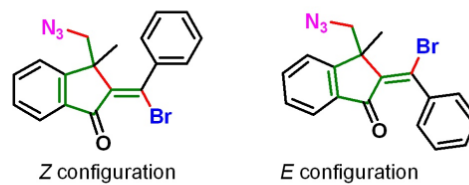

Z/E= 10: 1

<sup>13</sup>C NMR, CDCl<sub>3</sub>, 100 HMz

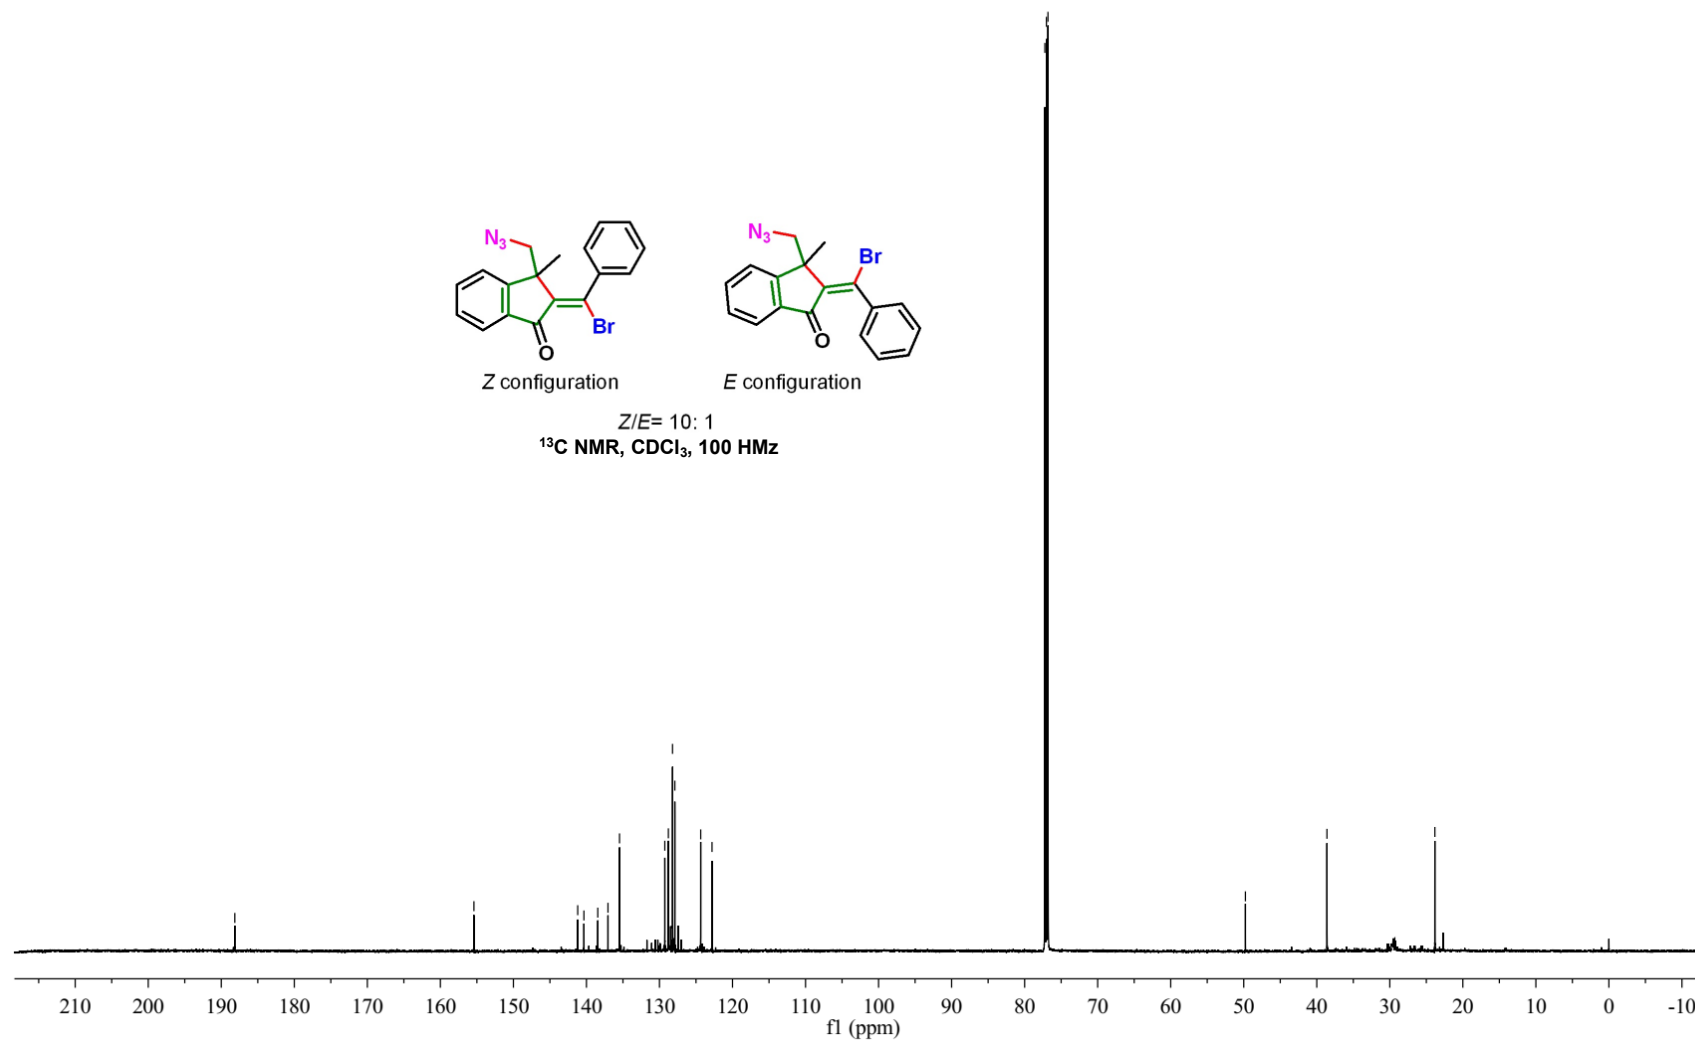

<sup>13</sup>C NMR Spectrum of Compound 41

maxiaoming17  
yhf-52

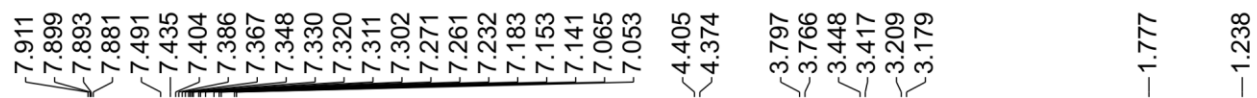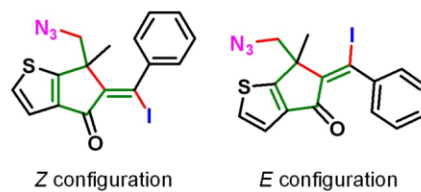

Z/E= 1:1  
<sup>1</sup>H NMR, CDCl<sub>3</sub>, 400 HMz

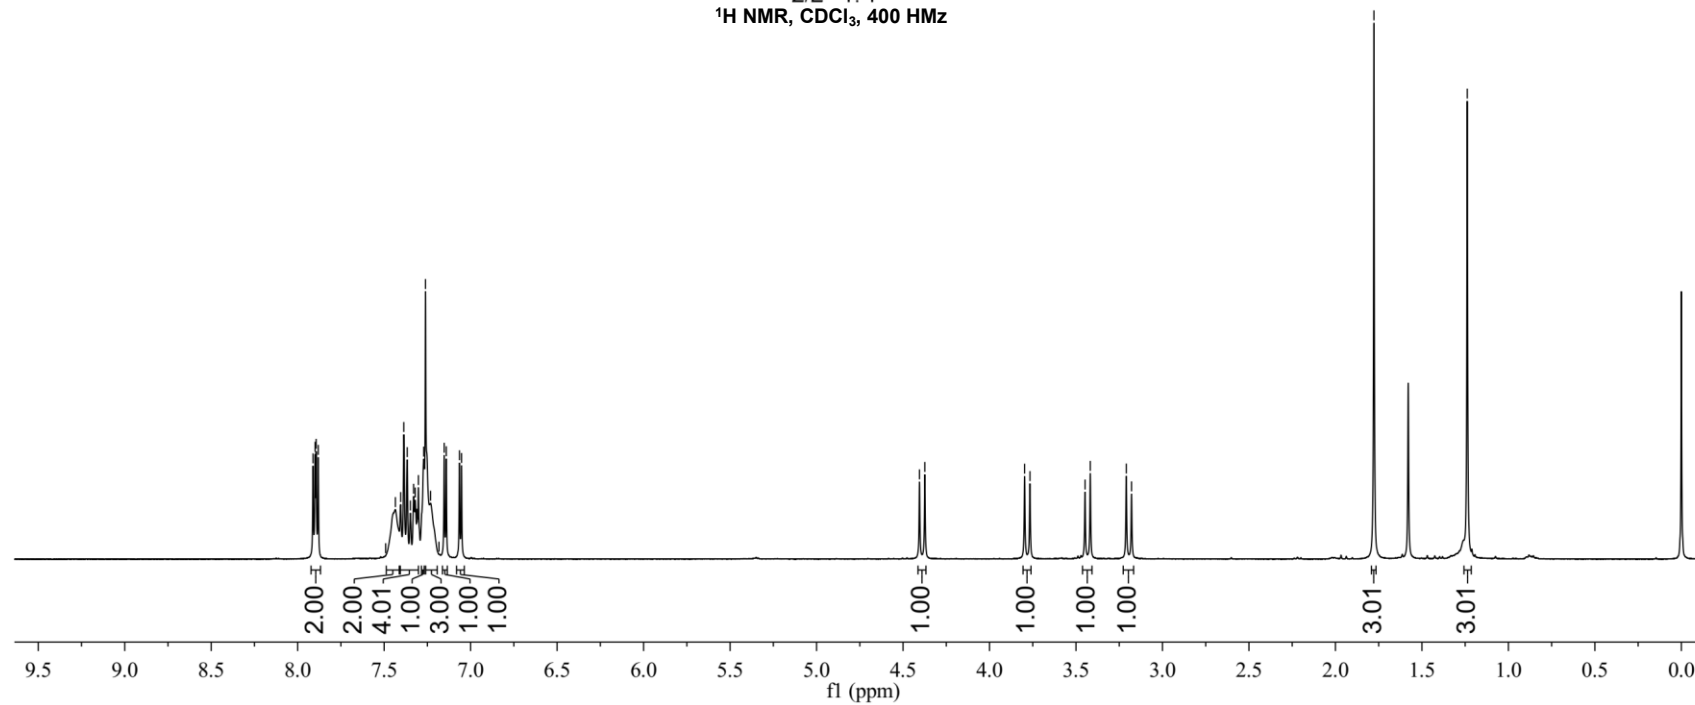

<sup>1</sup>H NMR Spectrum of Compound 4m

YHF-52

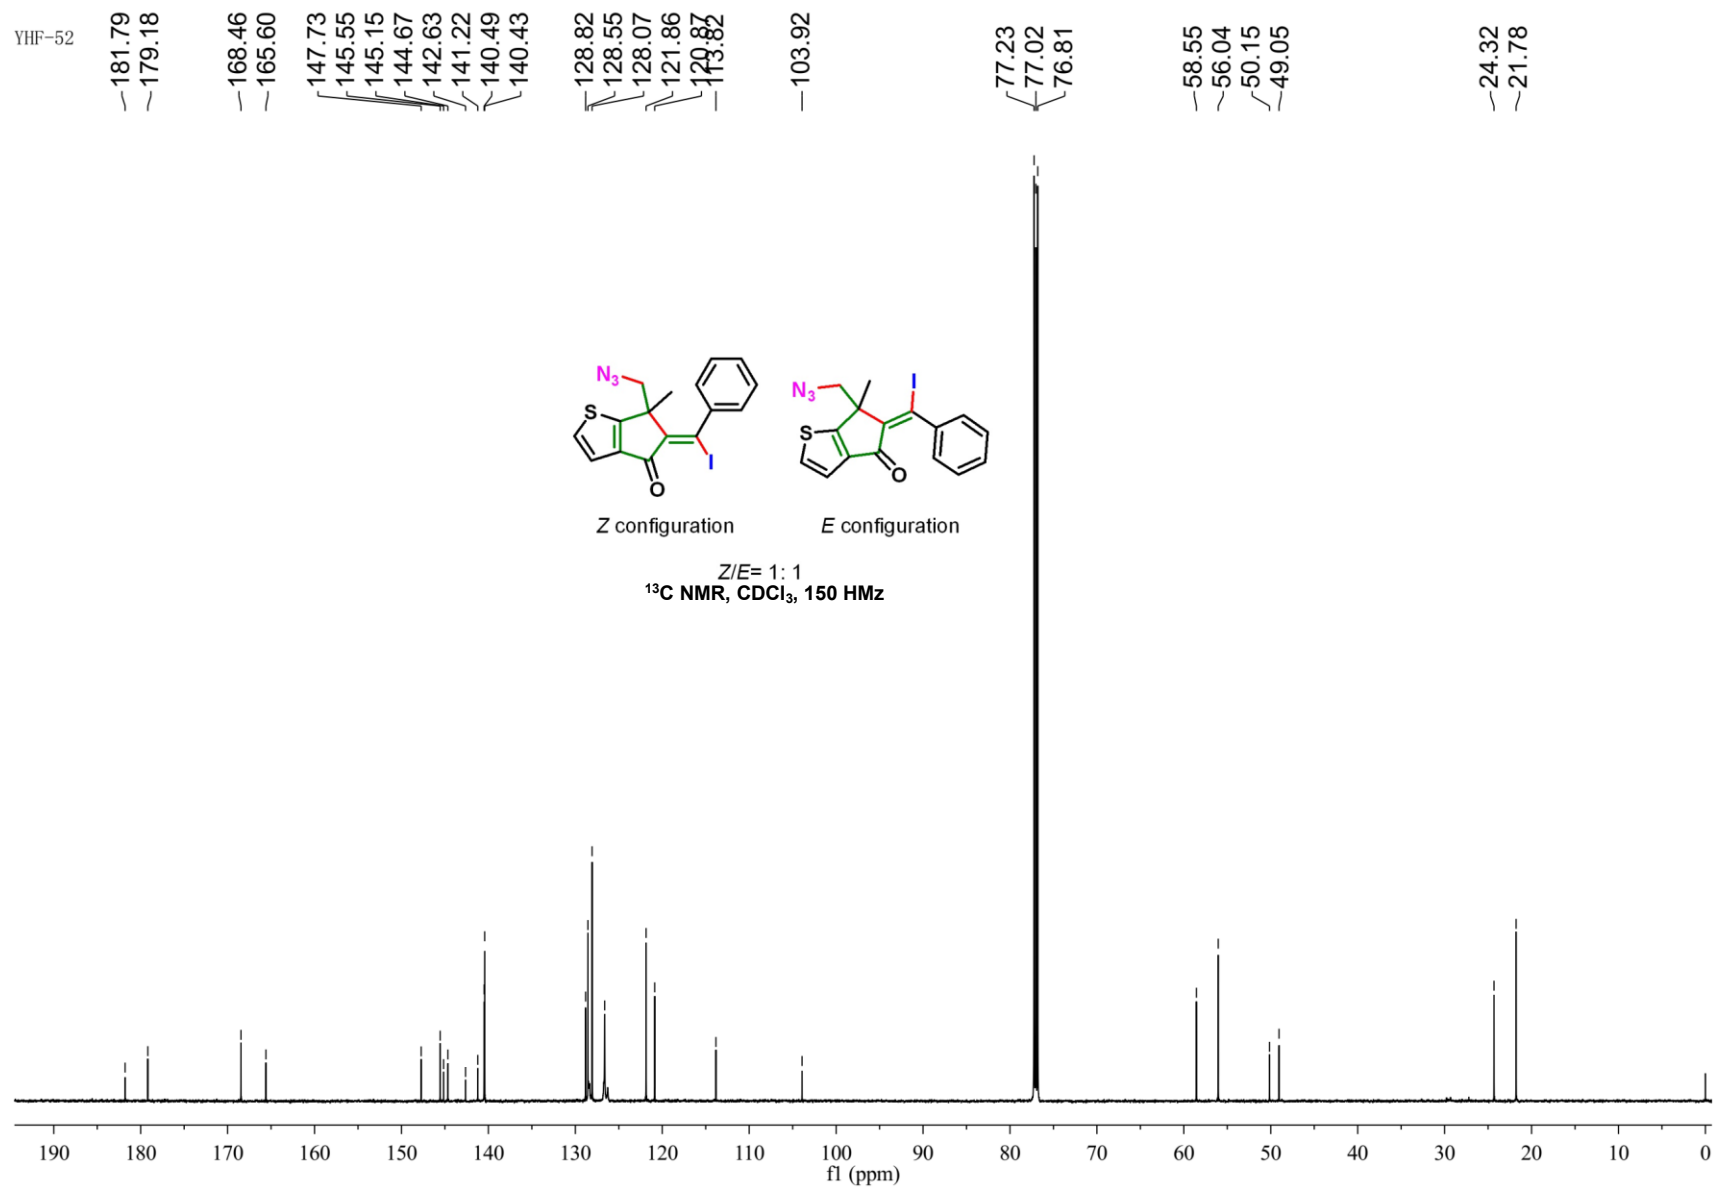

<sup>13</sup>C NMR Spectrum of Compound 4m

maximum  
 yhf  
 7.780  
 7.766  
 7.586  
 7.567  
 7.415  
 7.396  
 7.378  
 7.358  
 7.334  
 7.321  
 7.306  
 7.260  
 7.188  
 7.168  
 7.117  
 7.097  
 6.656  
 6.638

5.054  
 5.025  
 4.325  
 4.295

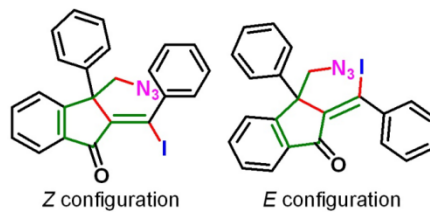

Z/E= 5: 1

<sup>1</sup>H NMR, CDCl<sub>3</sub>, 400 HMz

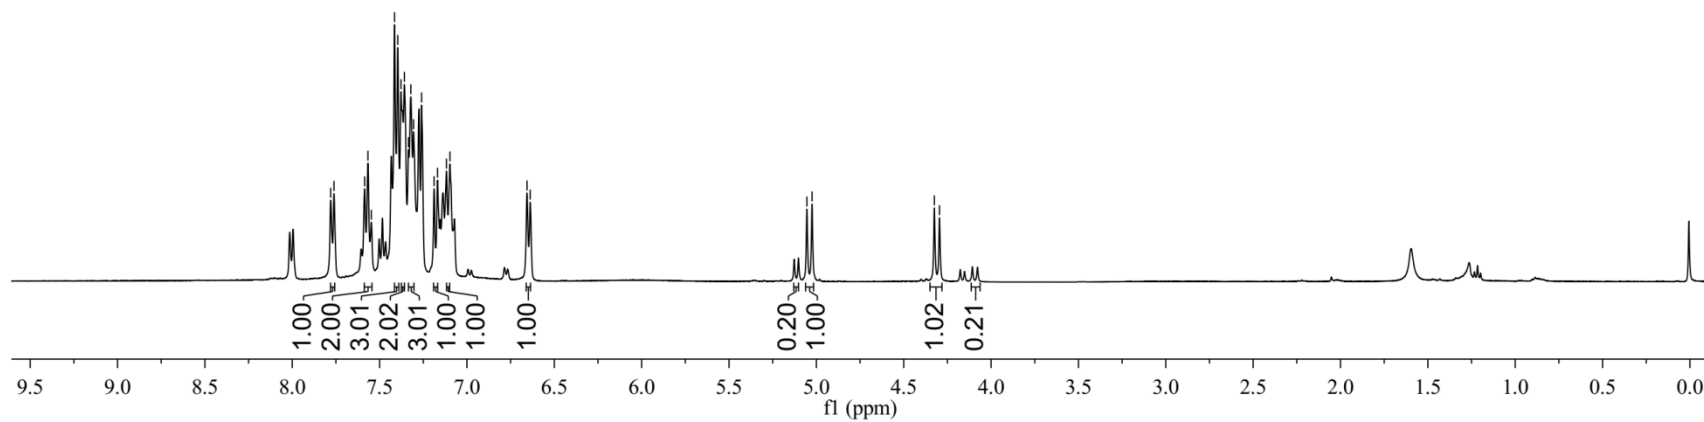

<sup>1</sup>H NMR Spectrum of Compound 6a

3maxiaomi  
yhf-1

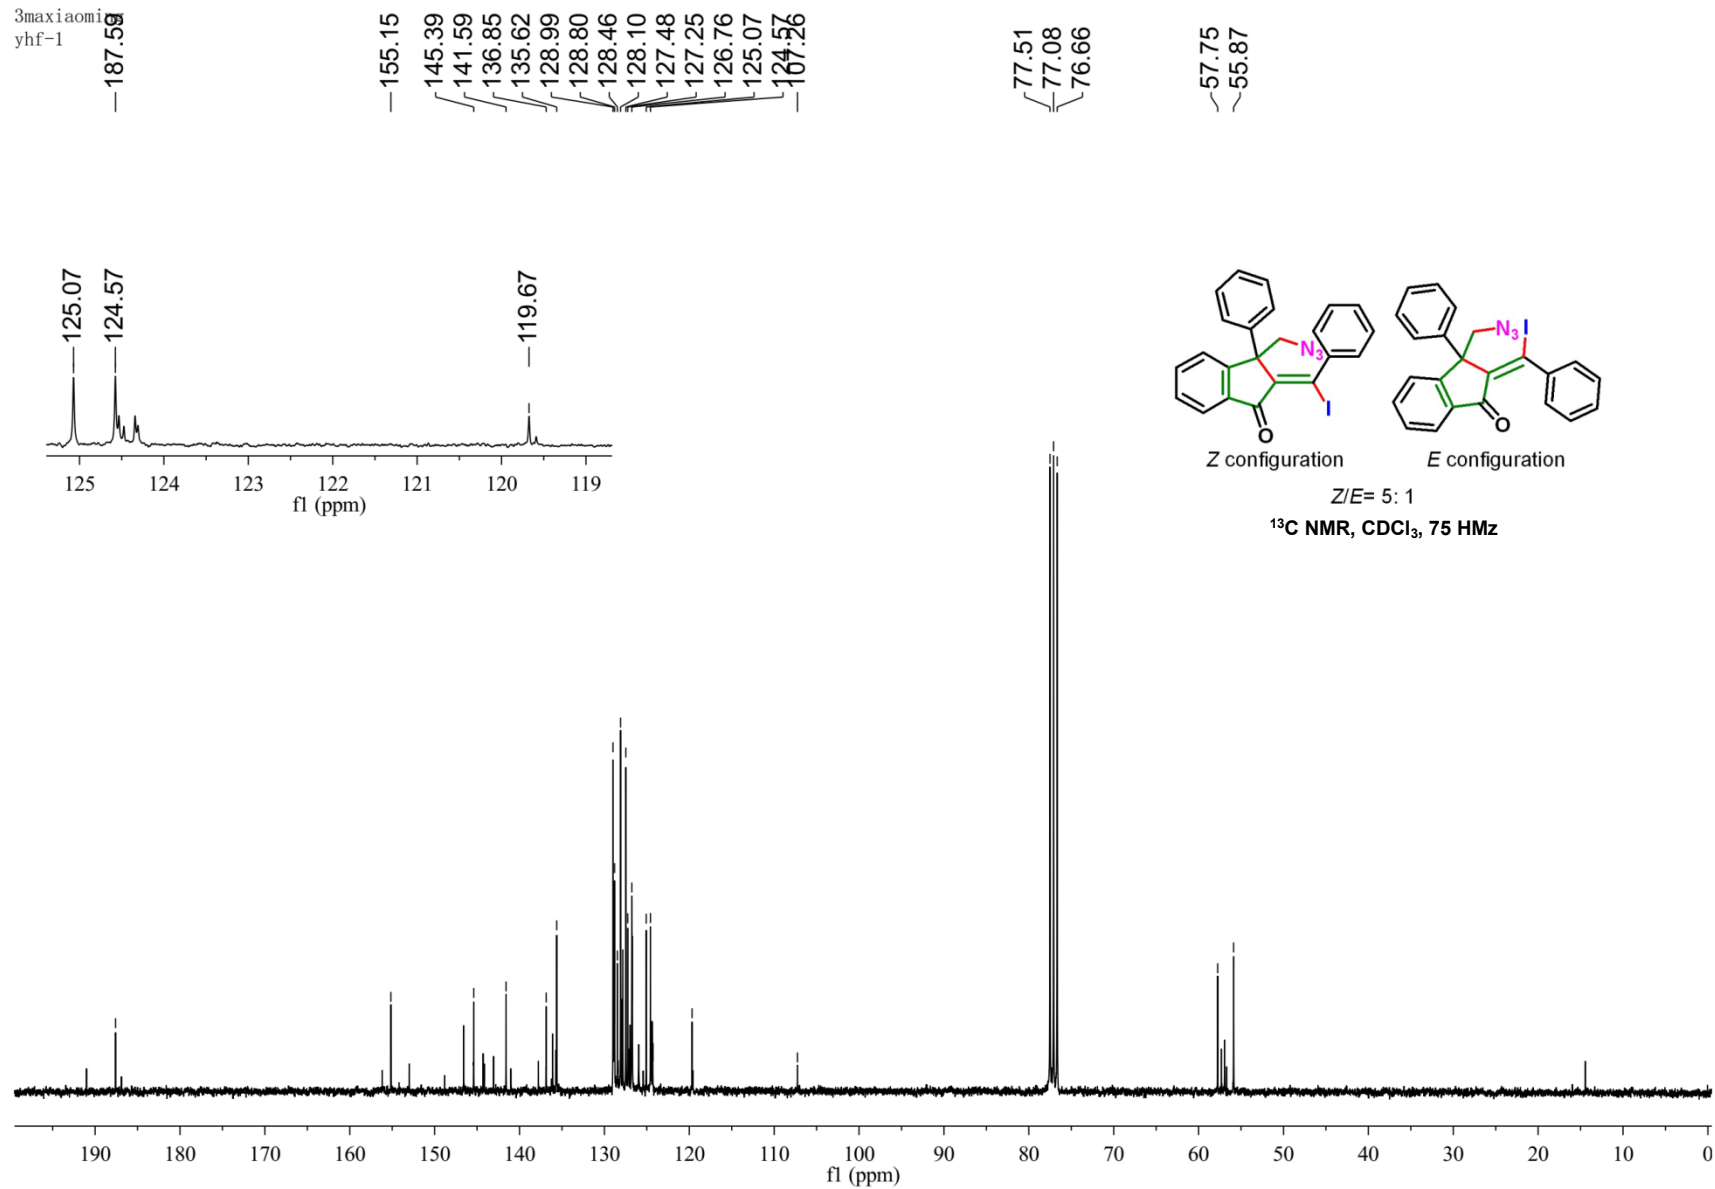

$^{13}\text{C}$  NMR Spectrum of Compound 6a



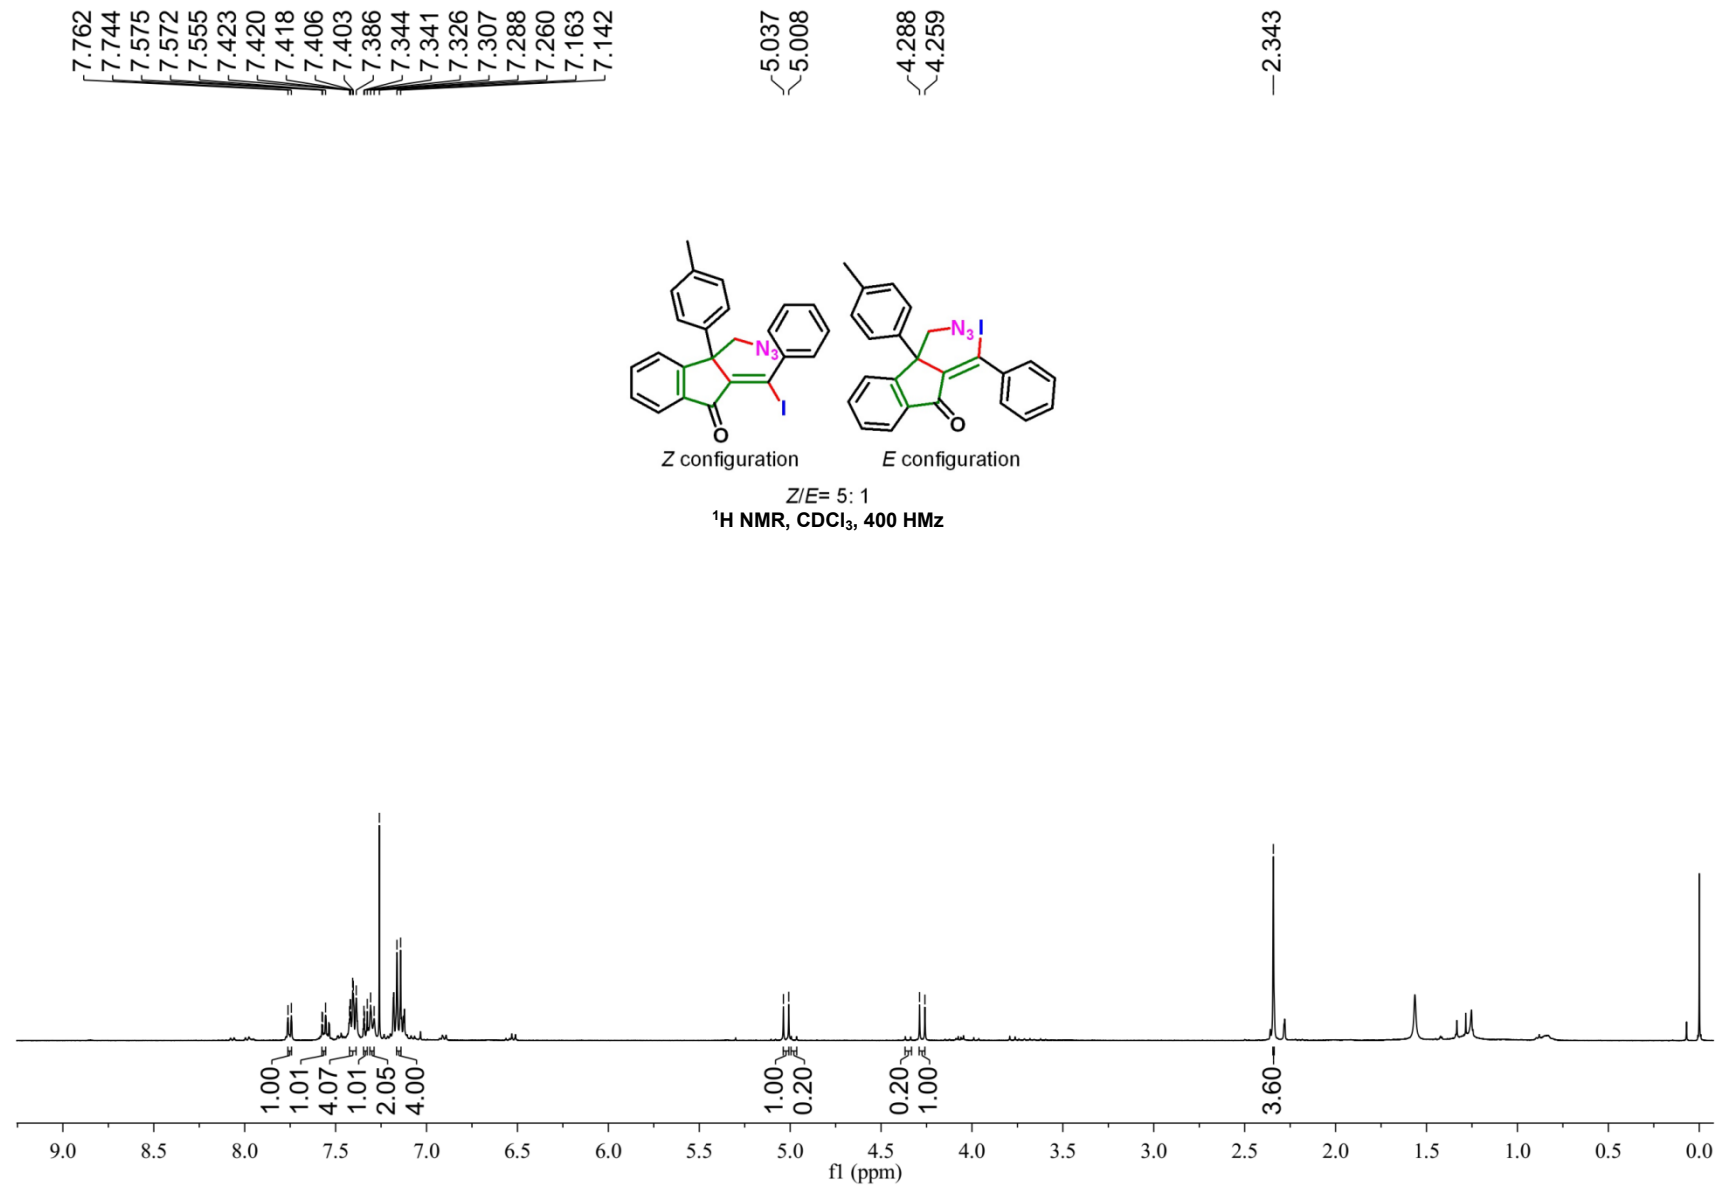

**<sup>1</sup>H NMR Spectrum of Compound 6b**

maxiaoming18  
YHF 2

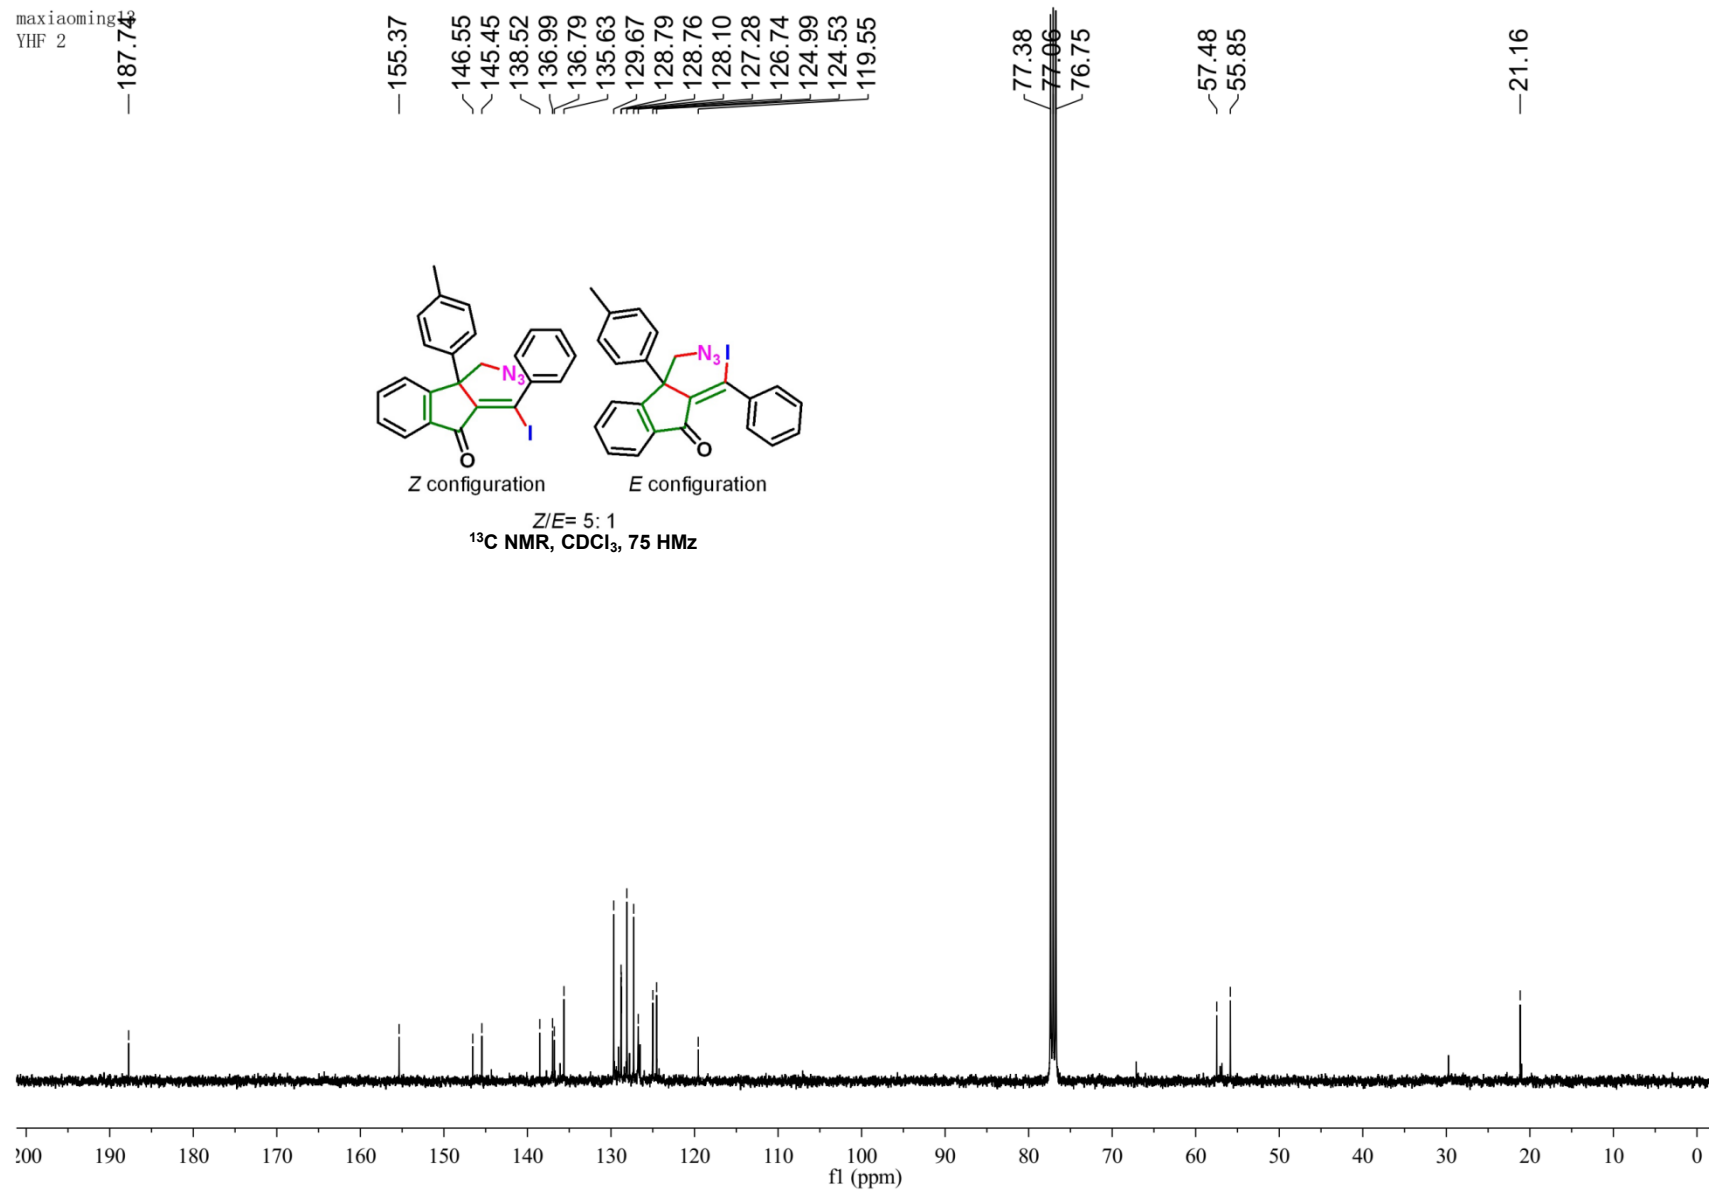

<sup>13</sup>C NMR Spectrum of Compound 6b

7.772  
 7.759  
 7.596  
 7.578  
 7.557  
 7.436  
 7.417  
 7.398  
 7.382  
 7.361  
 7.340  
 7.262  
 7.231  
 7.204  
 7.185  
 7.143  
 7.123  
 7.104  
 6.577  
 6.557  
  
 5.021  
 4.992  
  
 4.279  
 4.250  
 4.100  
 4.071  
 3.841  
 3.811  
  
 1.309  
 1.289

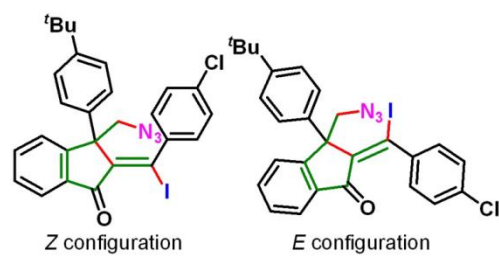

$Z/E = 2:1$   
 $^1\text{H NMR, CDCl}_3, 400 \text{ MHz}$

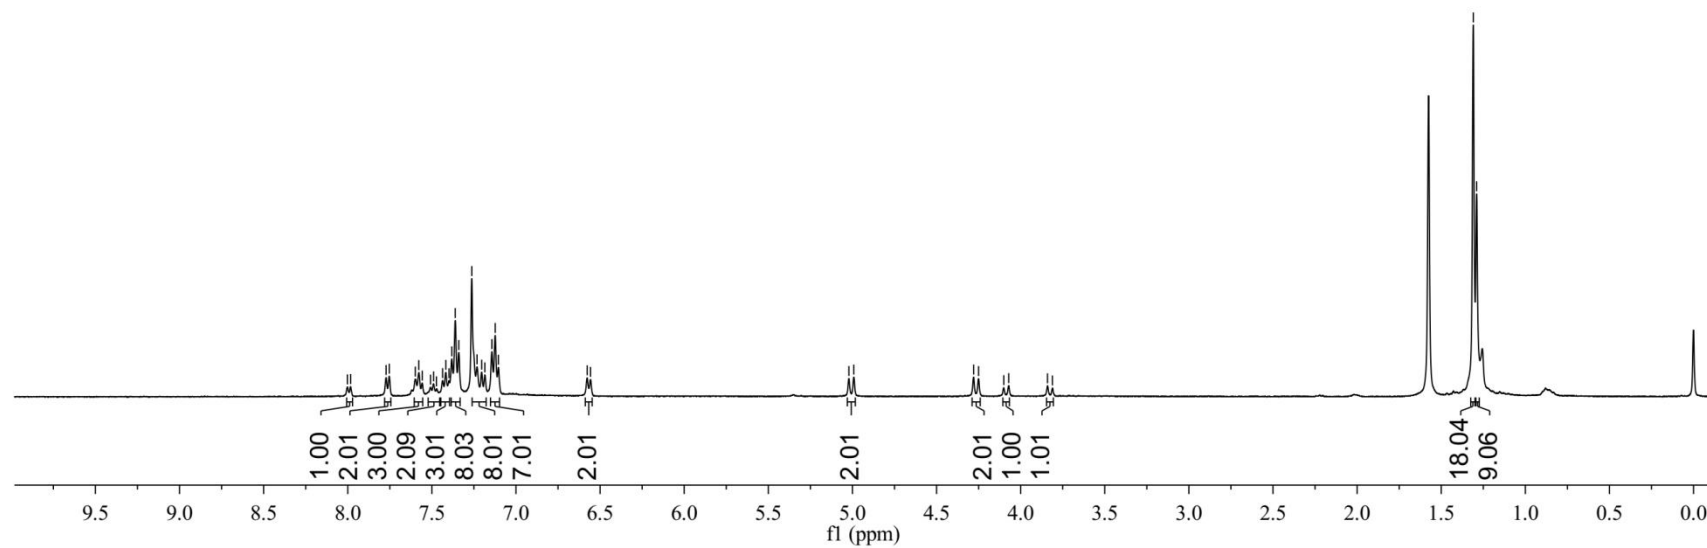

$^1\text{H NMR}$  Spectrum of Compound 6c

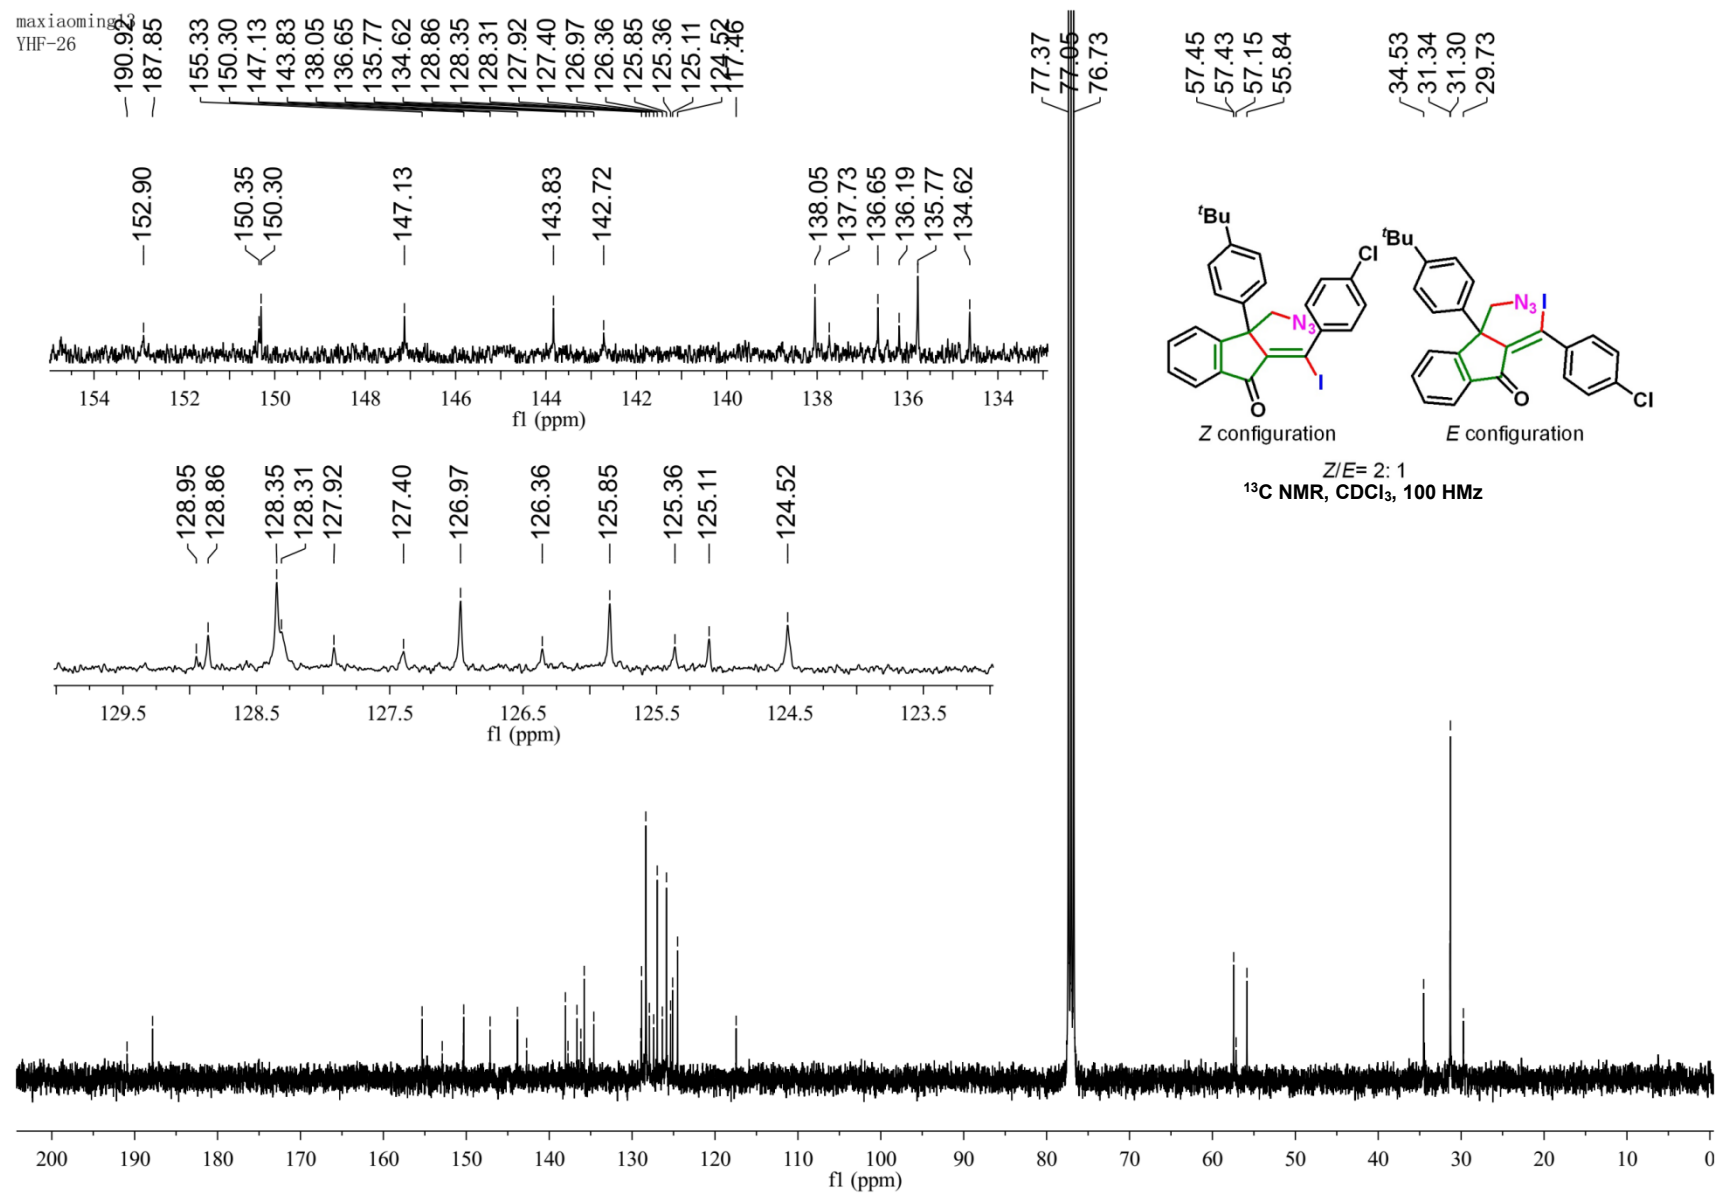

$^{13}\text{C NMR Spectrum of Compound 6c}$

max: 0.00  
 yhf

8.002  
 7.983  
 7.775  
 7.757  
 7.578  
 7.559  
 7.539  
 7.491  
 7.472  
 7.426  
 7.408  
 7.387  
 7.367  
 7.348  
 7.313  
 7.295  
 7.259  
 7.245  
 7.211  
 7.178  
 7.157  
 7.138  
 7.125  
 7.106  
 7.094  
 7.075  
 6.678  
 6.659  
 6.640  
 5.011

4.316  
 4.287  
 4.112  
 4.083  
 3.829  
 3.799

2.411  
 2.313

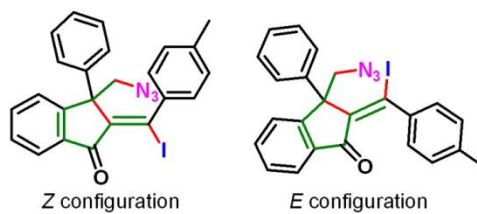

Z/E = 1:1  
<sup>1</sup>H NMR, CDCl<sub>3</sub>, 400 MHz

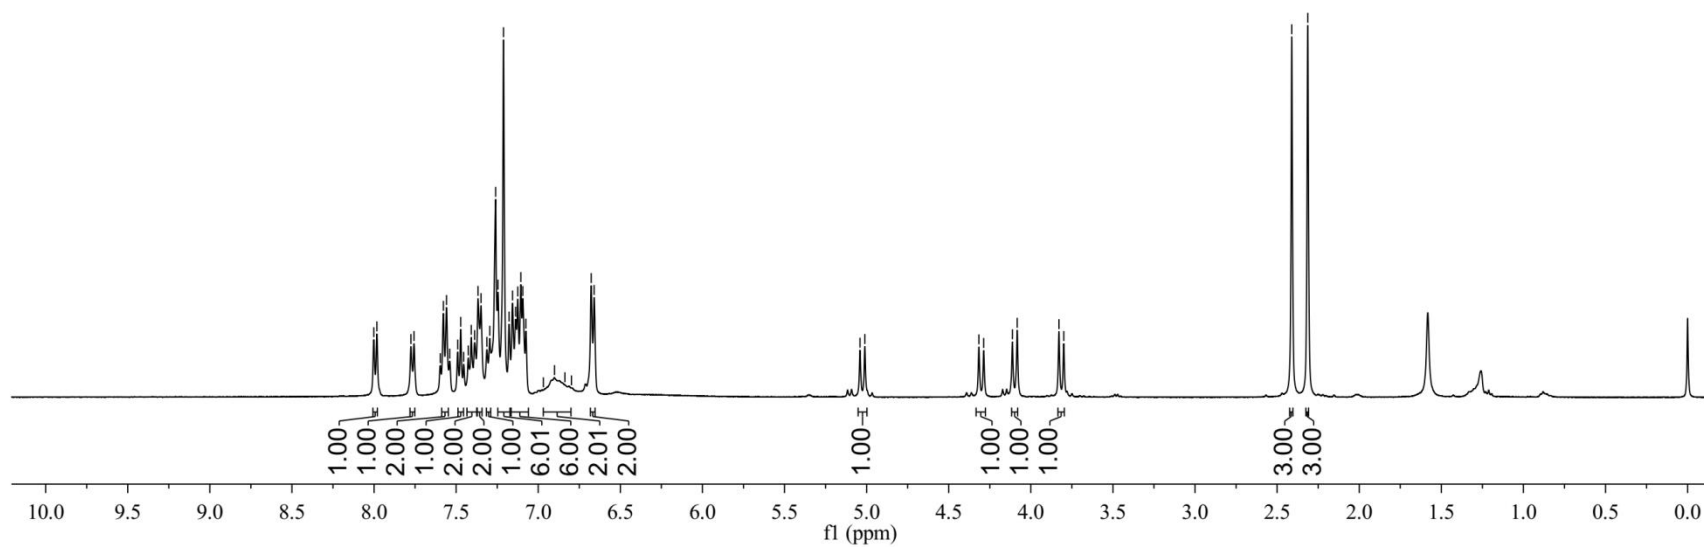

<sup>1</sup>H NMR Spectrum of Compound 6d

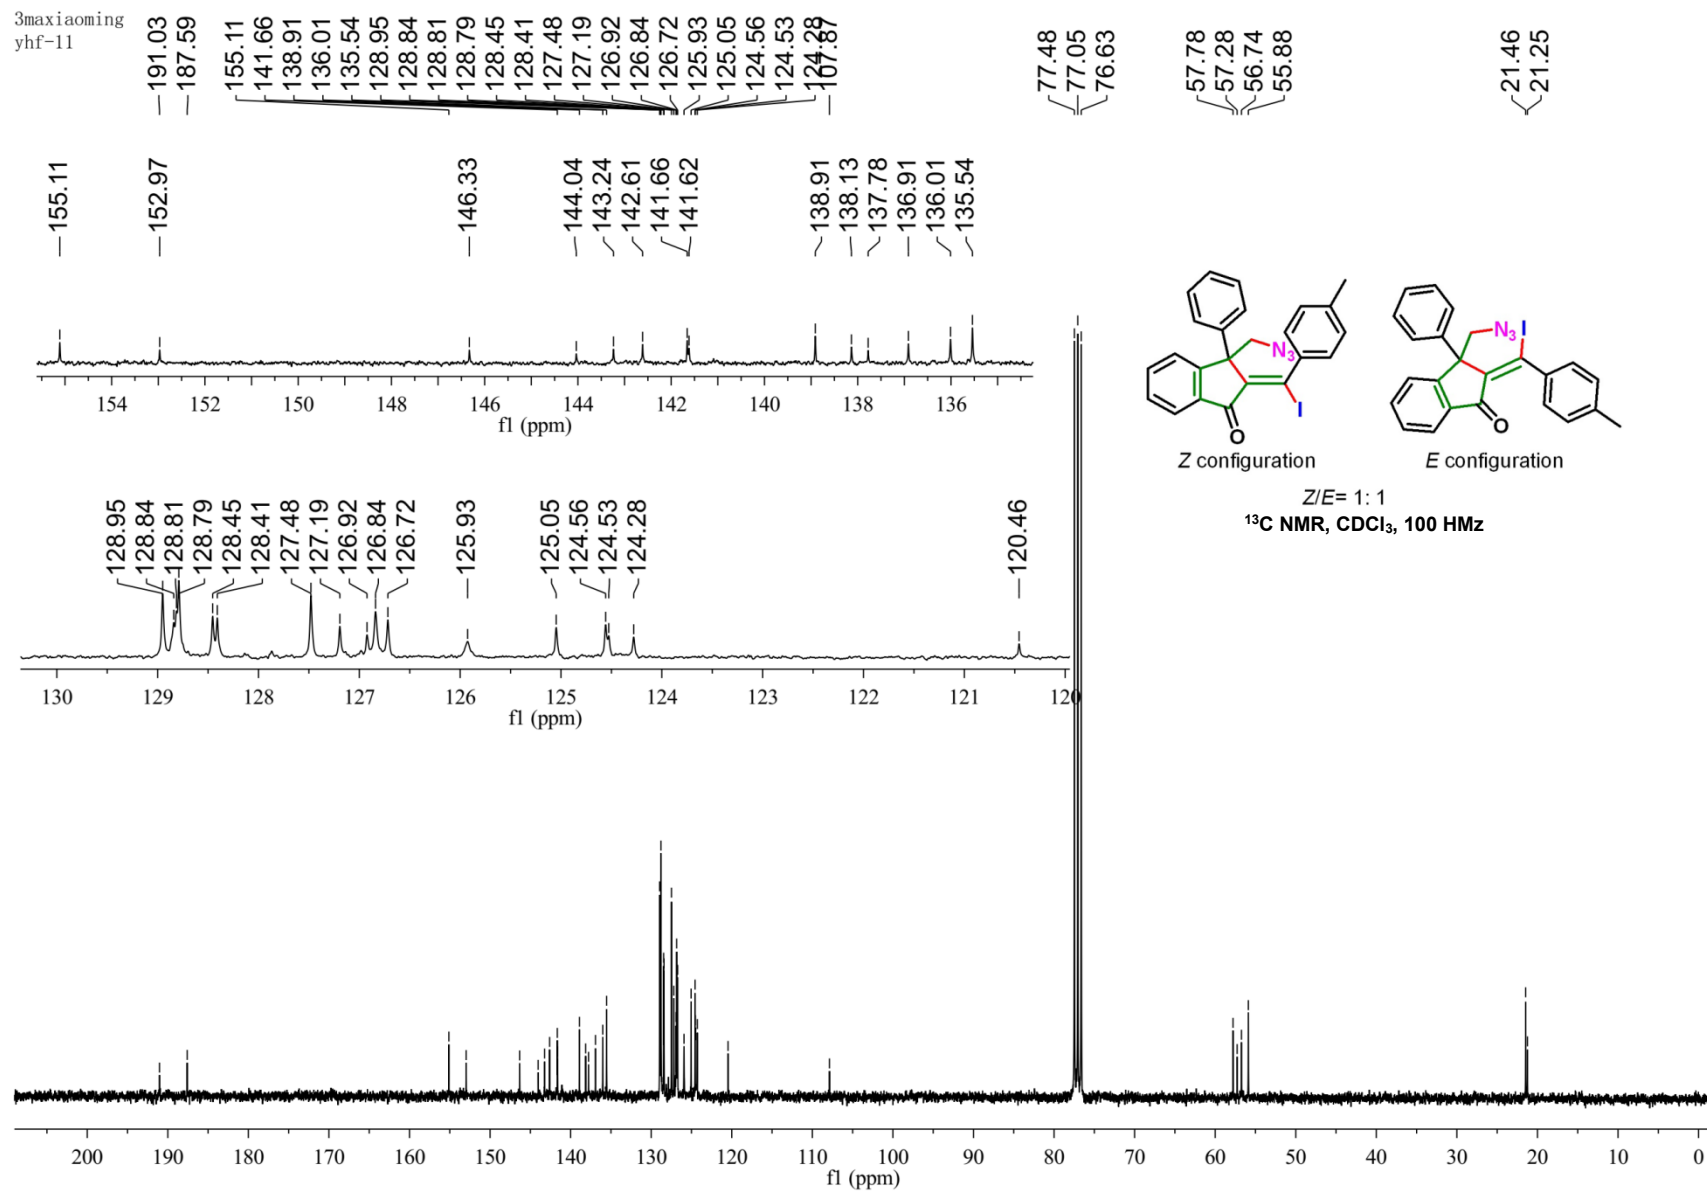

$^{13}\text{C NMR Spectrum of Compound 6d}$

YHF-2.27-16.7.fid

8.026  
8.007  
7.473  
7.461  
7.451  
7.434  
7.415  
7.393  
7.389  
7.378  
7.372  
7.287  
7.127  
7.116  
7.097  
7.033  
6.994  
5.925  
5.066  
5.054  
4.206  
4.182  
4.130  
4.101  
3.925  
3.901  
3.834  
3.804

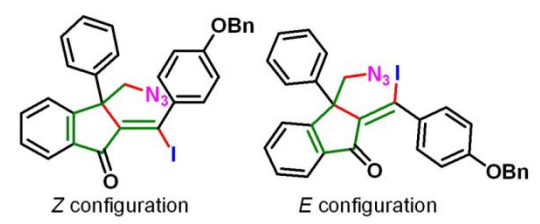

Z/E= 2.5: 1

<sup>1</sup>H NMR, CDCl<sub>3</sub>, 400 MHz

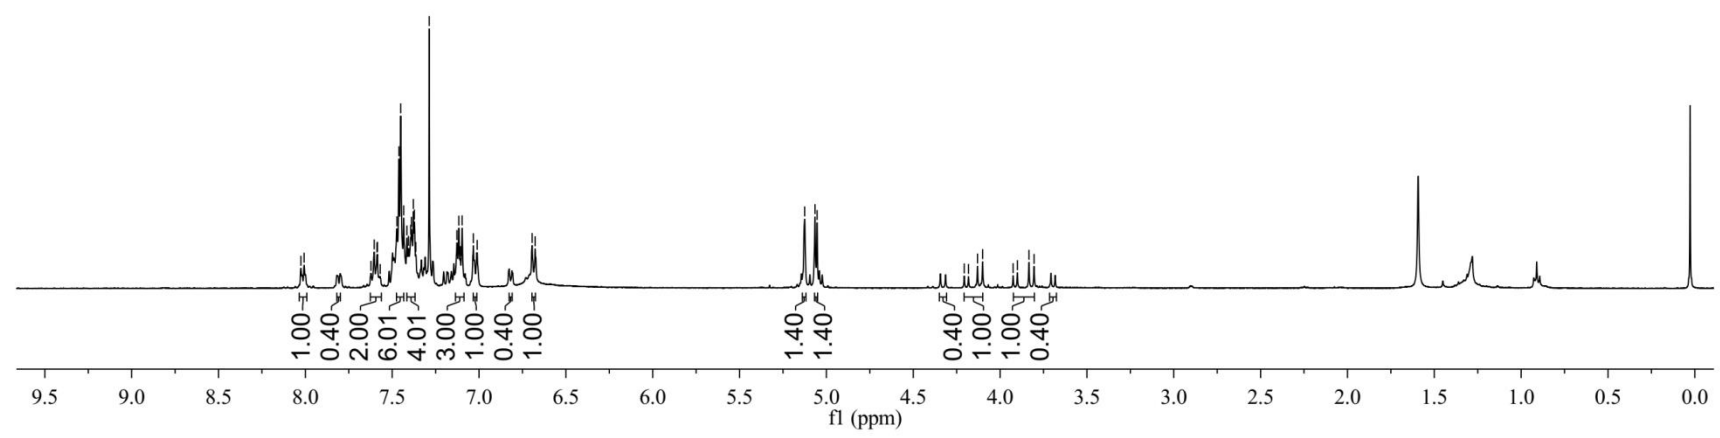

<sup>1</sup>H NMR Spectrum of Compound 6c

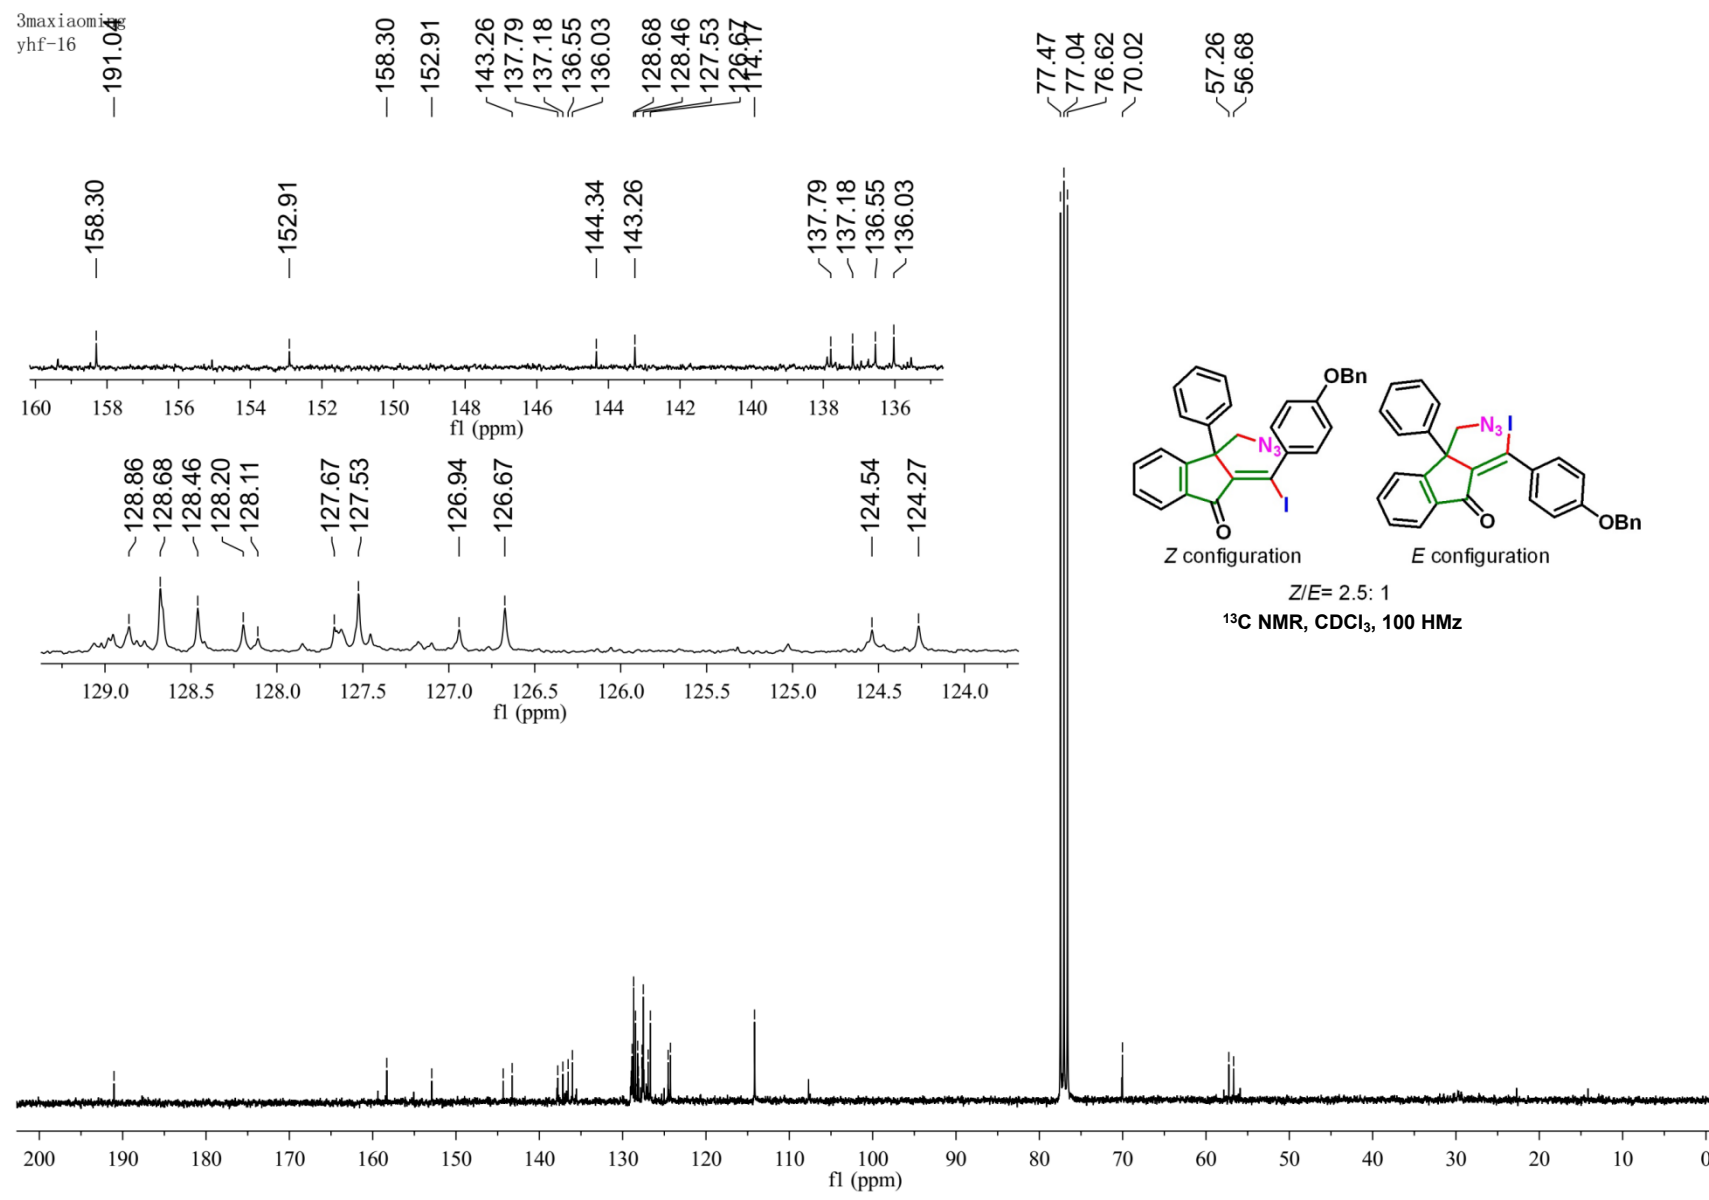

<sup>13</sup>C NMR Spectrum of Compound 6e



maxiaomings  
yhf-17

7.783  
7.764  
7.591  
7.573  
7.554  
7.442  
7.423  
7.371  
7.353  
7.320  
7.302  
7.257  
7.249  
7.229  
7.181  
7.161  
7.109  
7.088

5.042  
5.012

4.307  
4.277

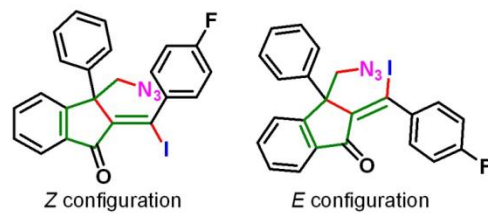

Z/E = 10:1  
<sup>1</sup>H NMR, CDCl<sub>3</sub>, 400 MHz

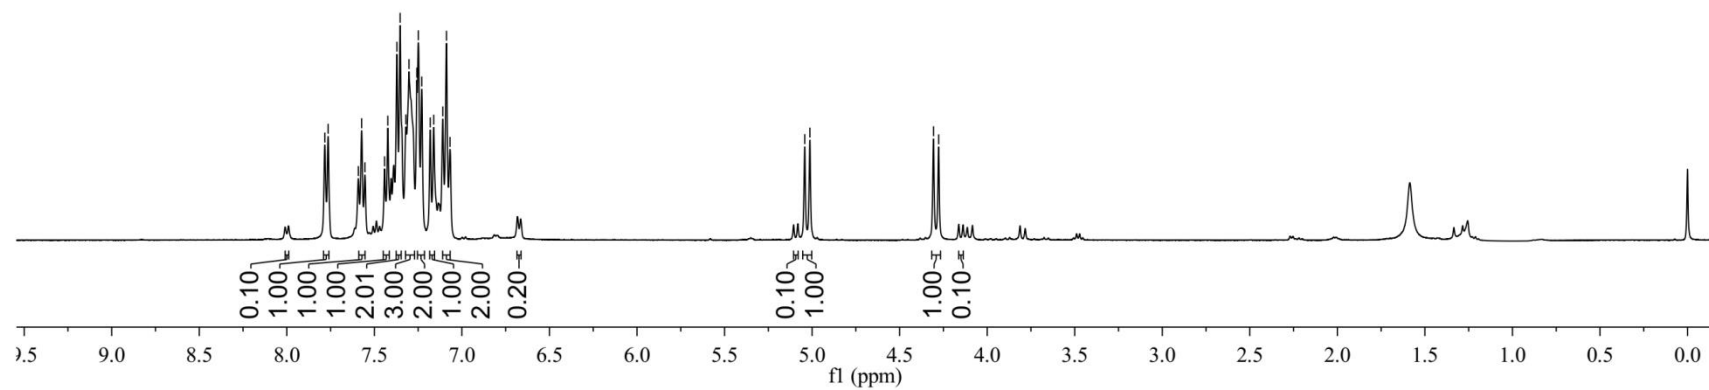

<sup>1</sup>H NMR Spectrum of Compound 6f

maxiaomin  
YHF-17

— 187.696

~ 163.998  
~ 161.521  
~ 155.134  
~ 147.036  
~ 141.457  
~ 141.300  
~ 141.264  
~ 136.756  
~ 135.807  
~ 129.041  
~ 128.961  
~ 127.436  
~ 127.322  
~ 126.659  
~ 125.066  
~ 124.601  
~ 118.188  
~ 115.309  
~ 115.090

~ 77.396  
~ 77.079  
~ 76.761

~ 57.771  
~ 55.814

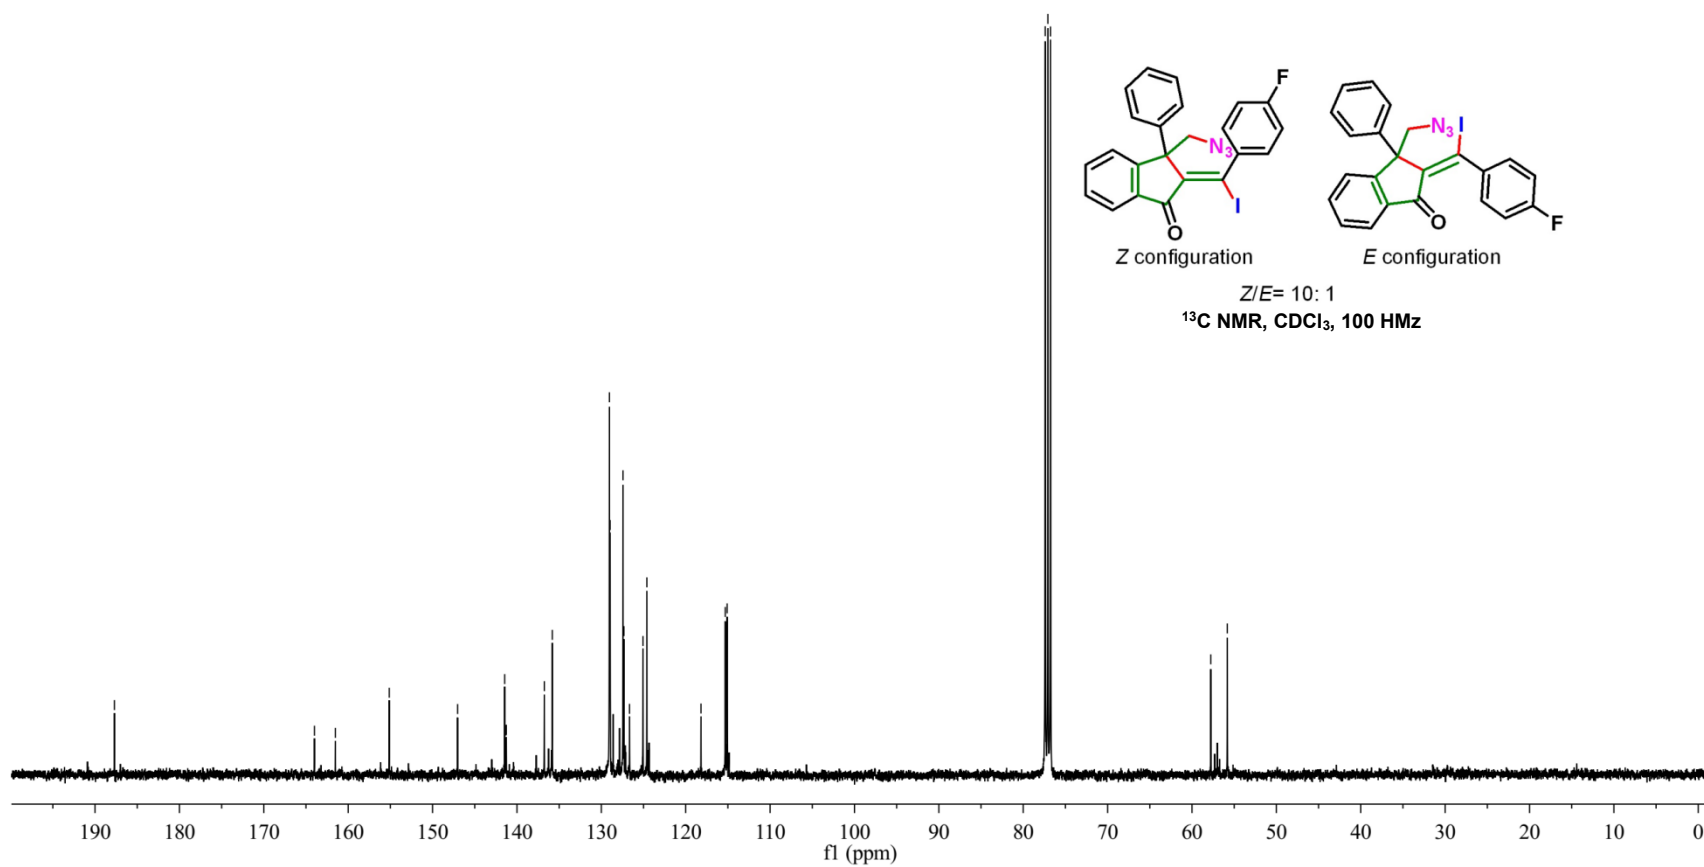

<sup>13</sup>C NMR Spectrum of Compound 6f

3maxiaoming  
yhf17

-111.991  
-112.285

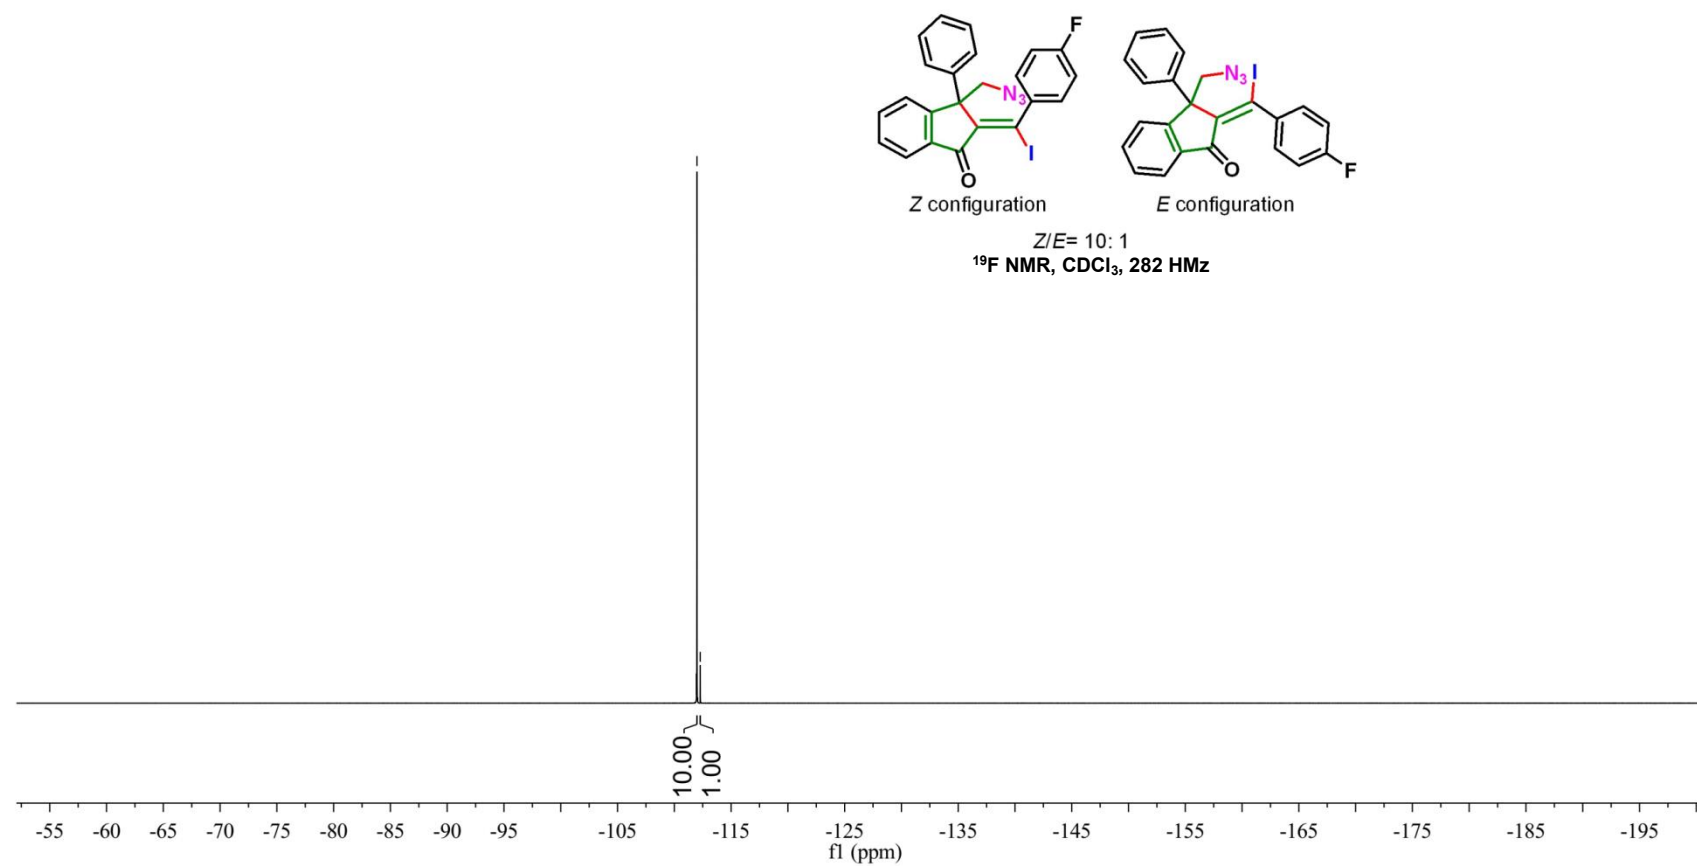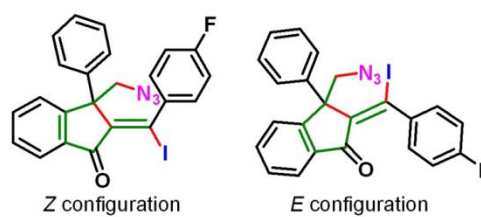

Z/E= 10: 1  
 $^{19}\text{F}$  NMR,  $\text{CDCl}_3$ , 282 MHz

$^{19}\text{F}$  NMR Spectrum of Compound 6f

maxiaoming12  
yhf-18

7.783  
7.764  
7.598  
7.579  
7.560  
7.448  
7.438  
7.429  
7.410  
7.386  
7.368  
7.354  
7.342  
7.323  
7.306  
7.288  
7.262  
7.247  
7.226  
7.183  
7.163  
7.137  
5.094  
5.070  
5.031  
5.002  
4.306  
4.276  
4.155  
4.131

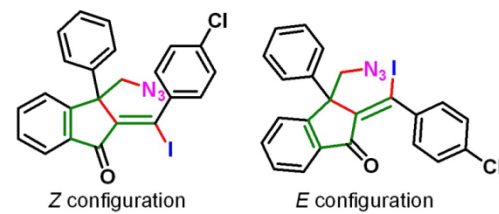

Z/E= 2: 1  
<sup>1</sup>H NMR, CDCl<sub>3</sub>, 400 MHz

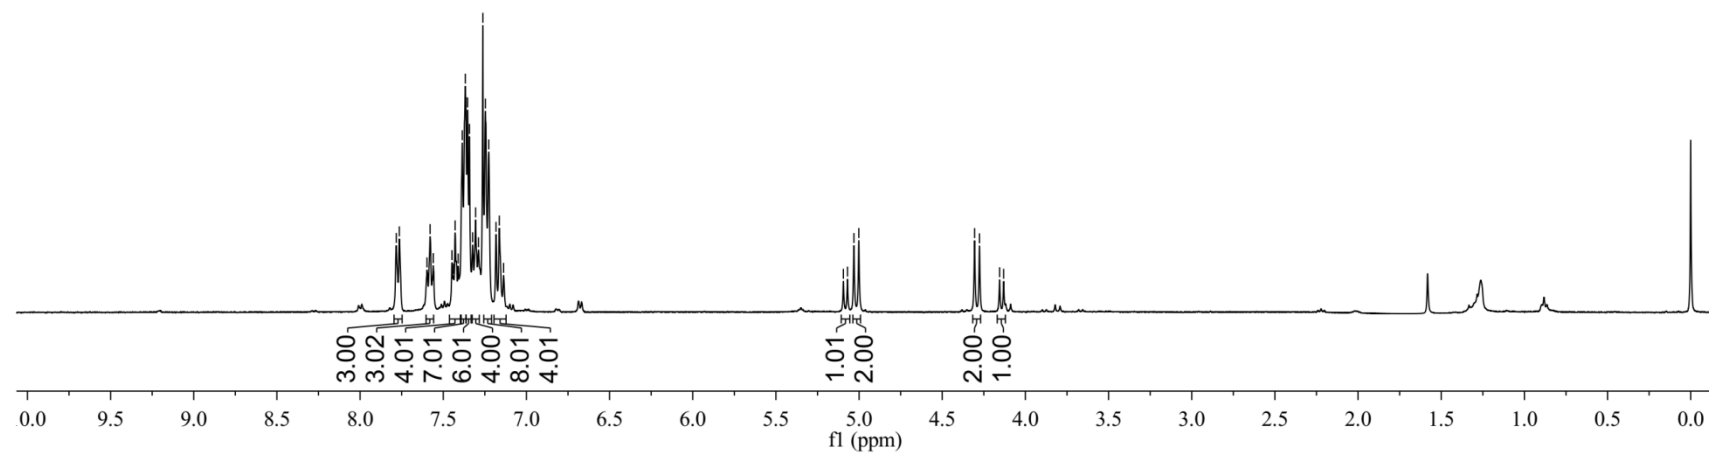

<sup>1</sup>H NMR Spectrum of Compound 6g

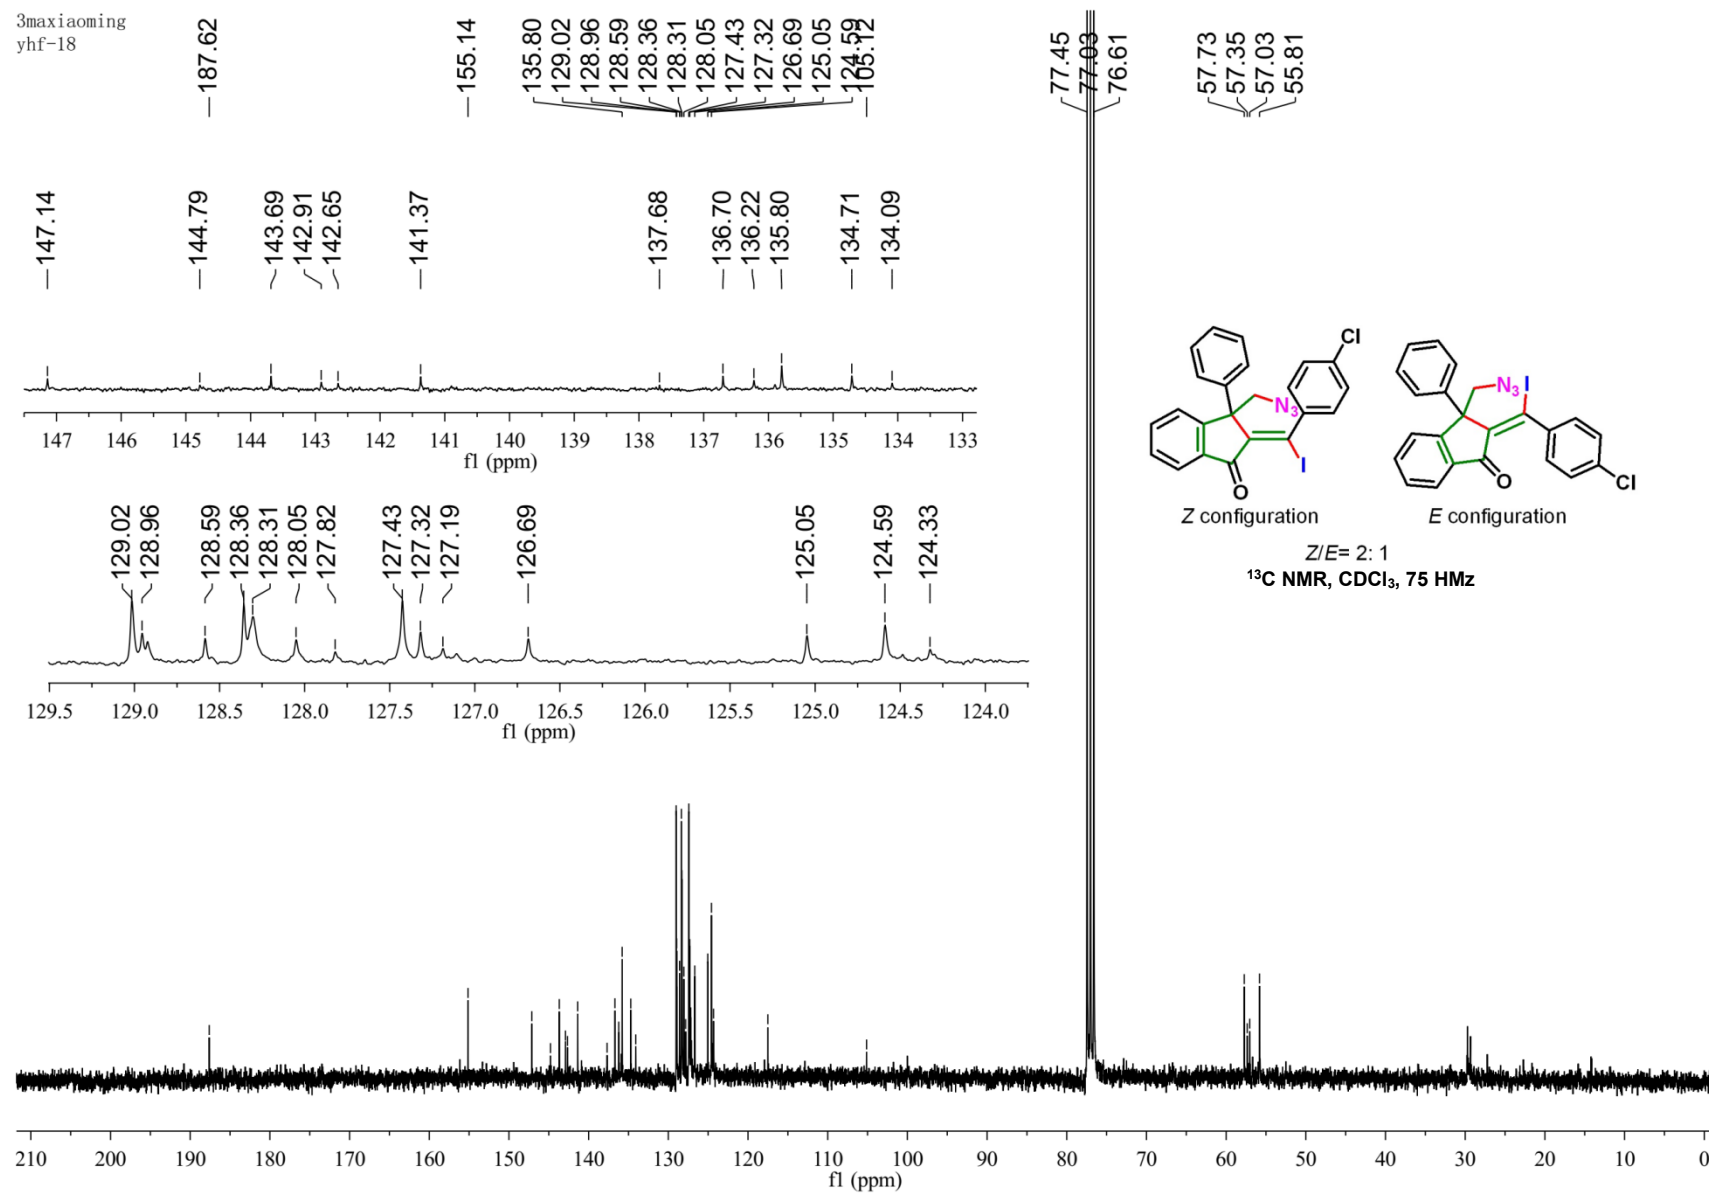

$^{13}\text{C}$  NMR Spectrum of Compound 6g

maxiaomi  
yhf-20

7.785  
7.764  
7.597  
7.578  
7.559  
7.541  
7.520  
7.447  
7.428  
7.410  
7.389  
7.372  
7.353  
7.322  
7.305  
7.261  
7.241  
7.223  
7.183  
7.163

5.026  
4.997

4.303  
4.274

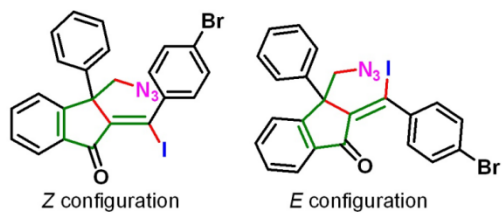

Z/E= 10:1

<sup>1</sup>H NMR, CDCl<sub>3</sub>, 400 MHz

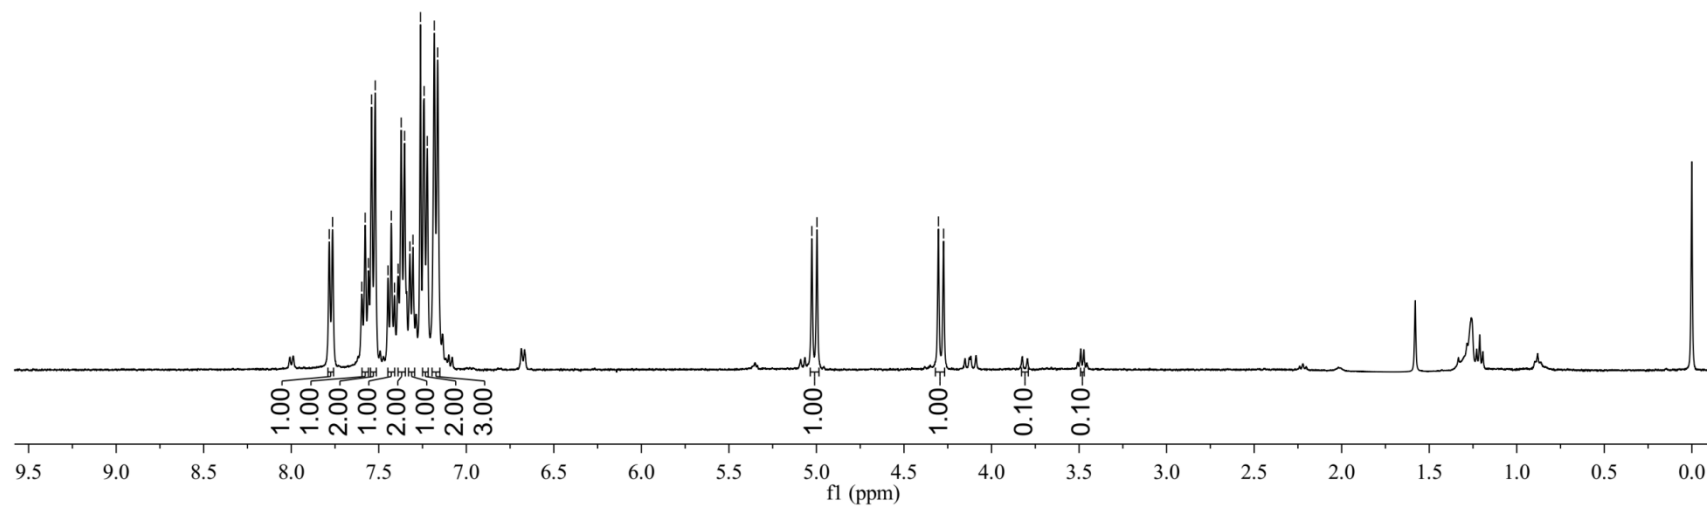

<sup>1</sup>H NMR Spectrum of Compound 6h

maxiaoming  
yhf-20  
—187.68

155.15  
147.11  
144.15  
141.34  
136.68  
135.86  
131.33  
129.04  
129.00  
128.51  
127.42  
127.35  
125.05  
124.62  
123.02  
117.48  
77.37  
77.05  
76.74  
57.71  
55.77

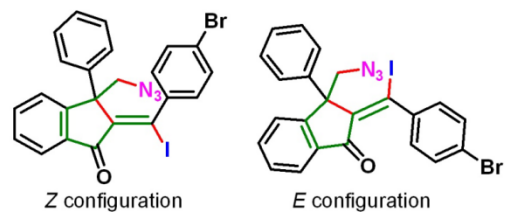

Z/E= 10: 1

<sup>13</sup>C NMR, CDCl<sub>3</sub>, 100 HMz

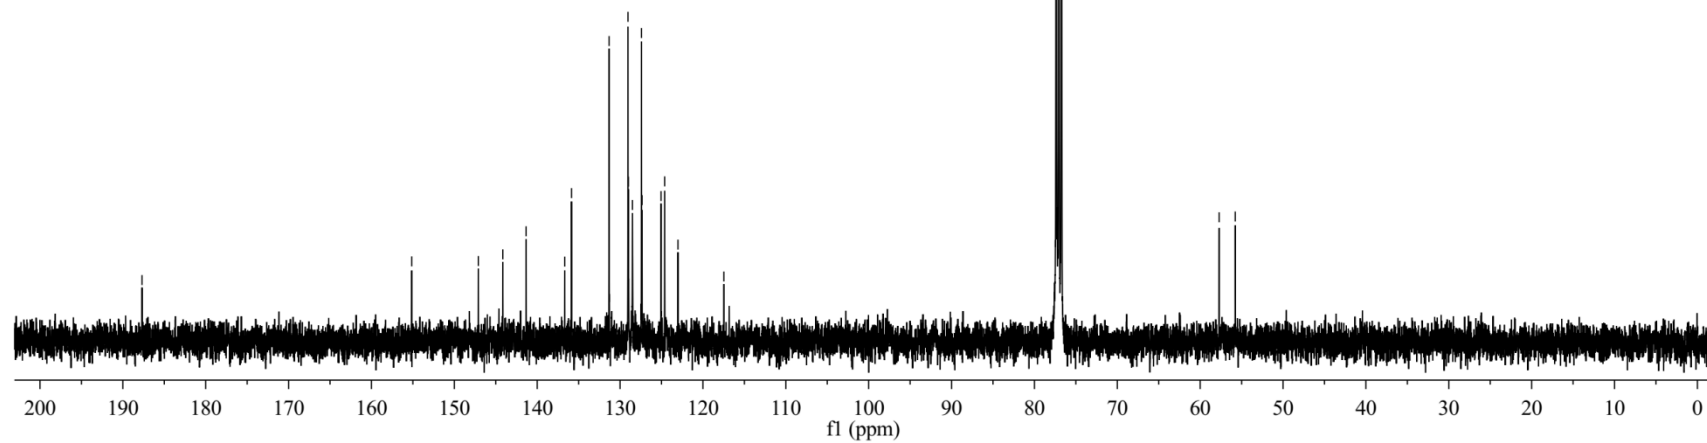

<sup>13</sup>C NMR Spectrum of Compound 6h

maxiaomilp  
yhf-9

7.806  
7.775  
7.757  
7.709  
7.689  
7.617  
7.599  
7.581  
7.461  
7.443  
7.425  
7.401  
7.384  
7.366  
7.347  
7.262  
7.241  
7.222  
7.196  
7.176

5.025  
4.996

4.308  
4.279

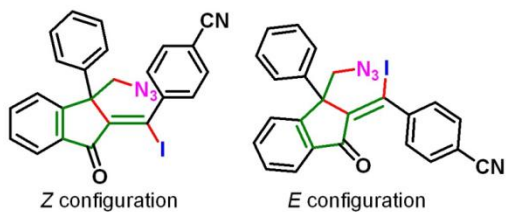

Z/E= 4: 1

<sup>1</sup>H NMR, CDCl<sub>3</sub>, 400 HMz

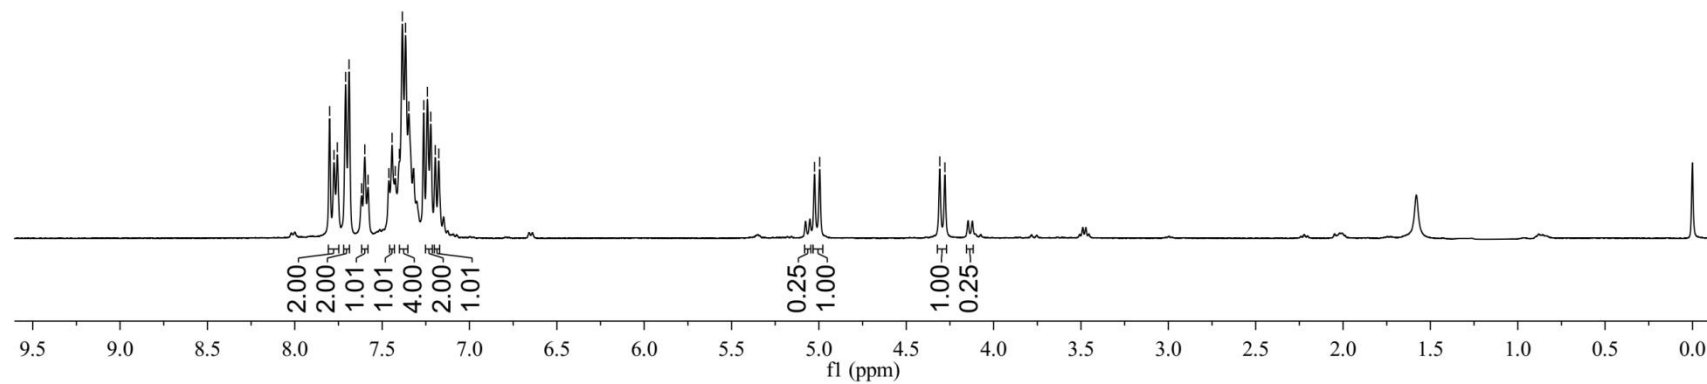

<sup>1</sup>H NMR Spectrum of Compound 6i



3maxiaomin  
yhf-9  
—187.69

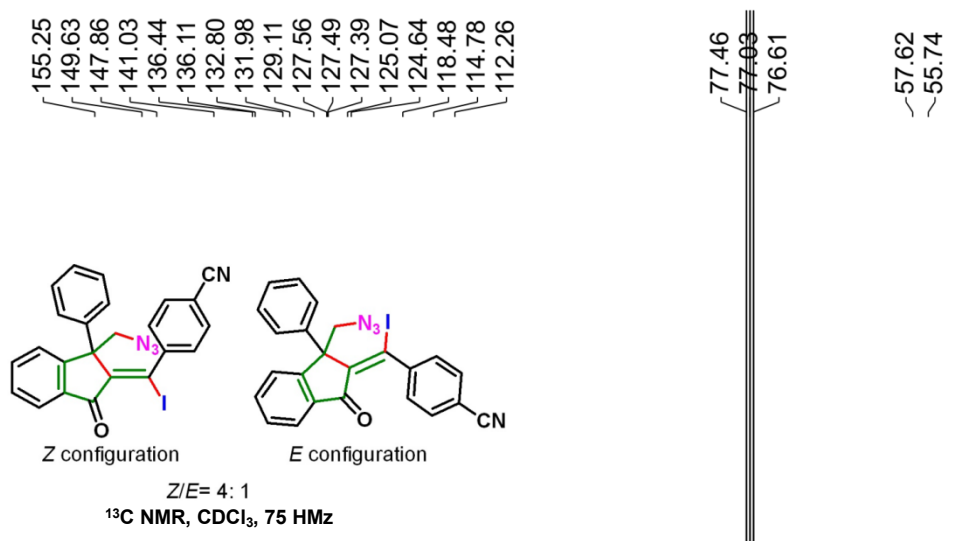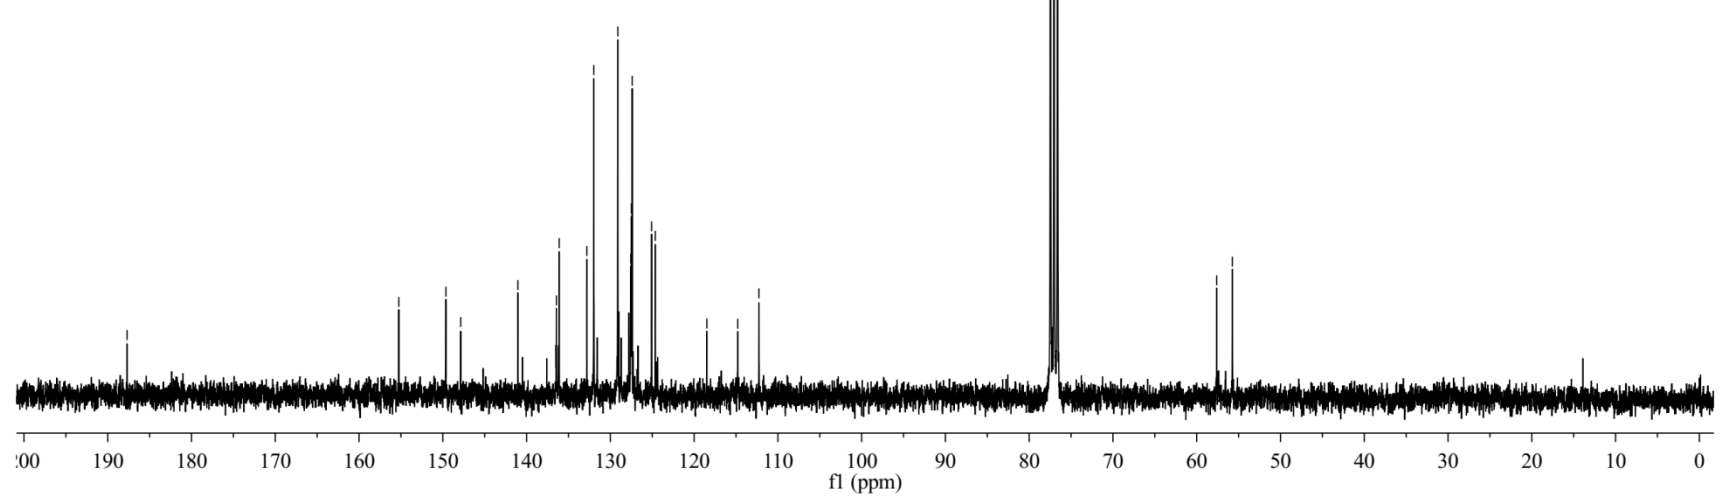

<sup>13</sup>C NMR Spectrum of Compound 6i

maxiaoming12  
yhf-29

7.695  
7.517  
7.496  
7.411  
7.393  
7.376  
7.357  
7.343  
7.310  
7.296  
7.279  
7.256  
7.244  
7.225  
7.115  
7.094

5.046  
5.016

4.298  
4.269

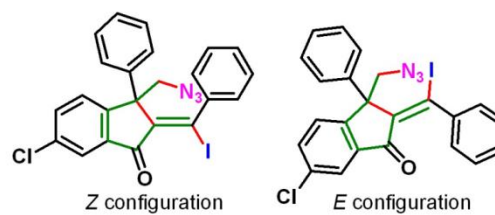

Z/E= 5:1  
<sup>1</sup>H NMR, CDCl<sub>3</sub>, 400 HMz

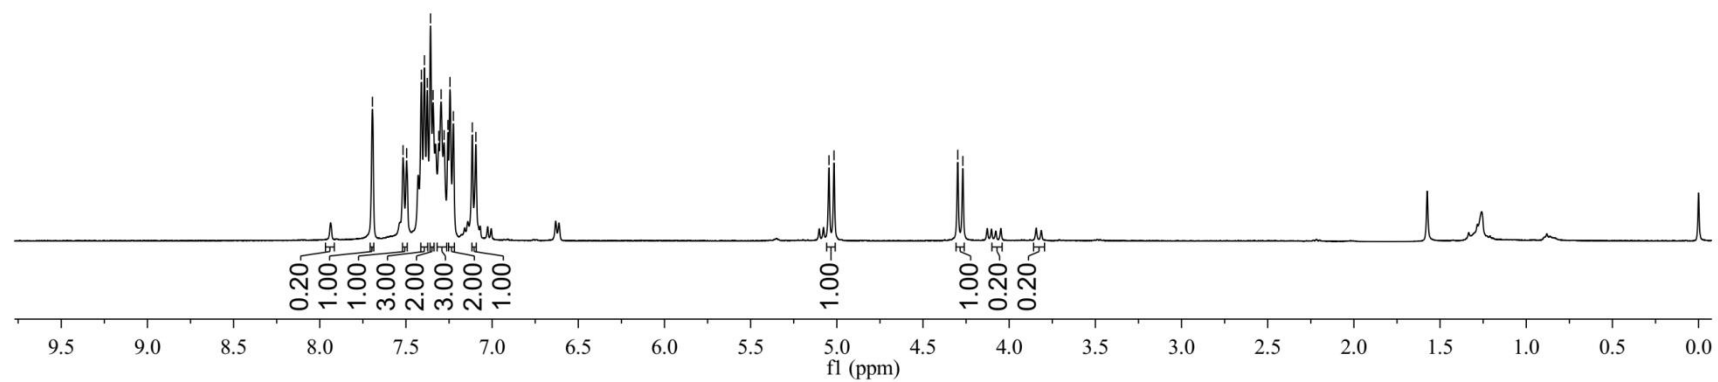

<sup>1</sup>H NMR Spectrum of Compound 6j

maxiaoming  
YHF-29

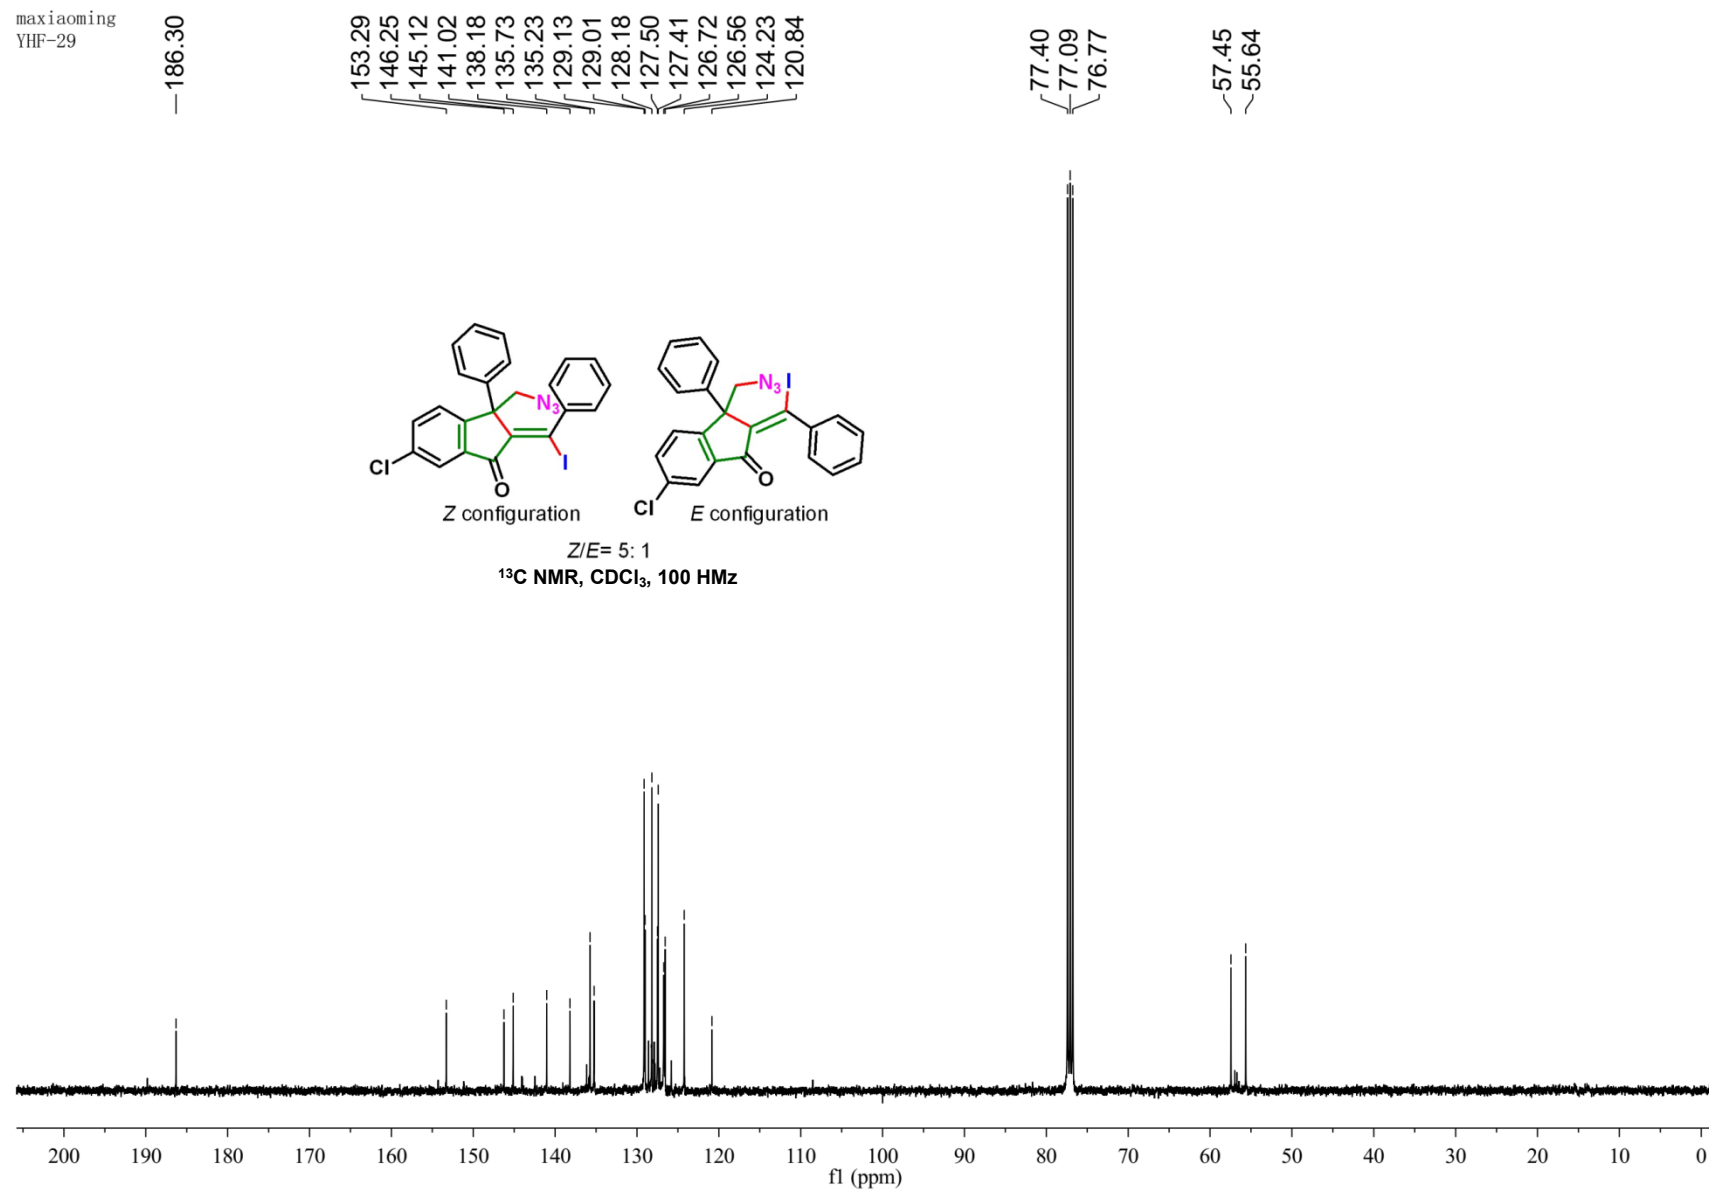

<sup>13</sup>C NMR Spectrum of Compound 6j

maxiaoming12  
YHF

7.547  
7.528  
7.516  
7.497  
7.395  
7.386  
7.378  
7.335  
7.317  
7.299  
7.279  
7.259  
7.041  
7.021  
6.999  
6.959  
6.940

5.067  
5.038

4.299  
4.270

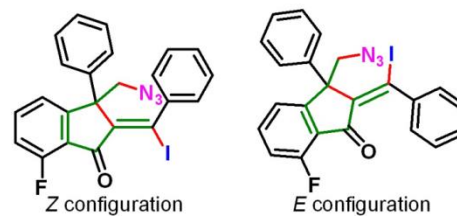

Z/E= 10: 1  
<sup>1</sup>H NMR, CDCl<sub>3</sub>, 400 HMz

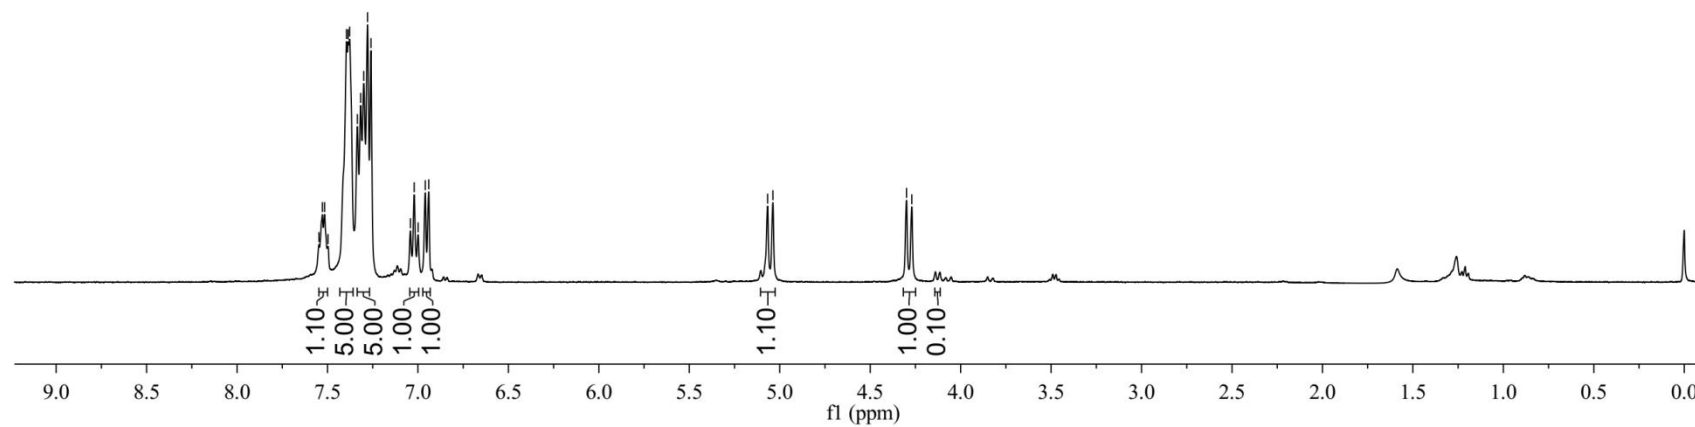

<sup>1</sup>H NMR Spectrum of Compound 6k

maxiaoming  
YHF-28  
— 184.163

160.844  
158.196  
157.173

145.895  
145.124  
141.153  
137.188  
137.105  
129.125  
128.863  
128.591  
128.180  
127.847  
127.479  
127.381  
126.644  
120.881  
120.840  
120.253  
115.724  
115.535

77.394  
77.076  
76.759

57.657  
55.864

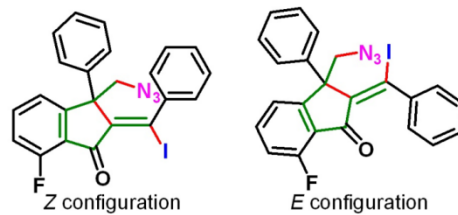

Z/E= 10:1  
<sup>13</sup>C NMR, CDCl<sub>3</sub>, 100 MHz

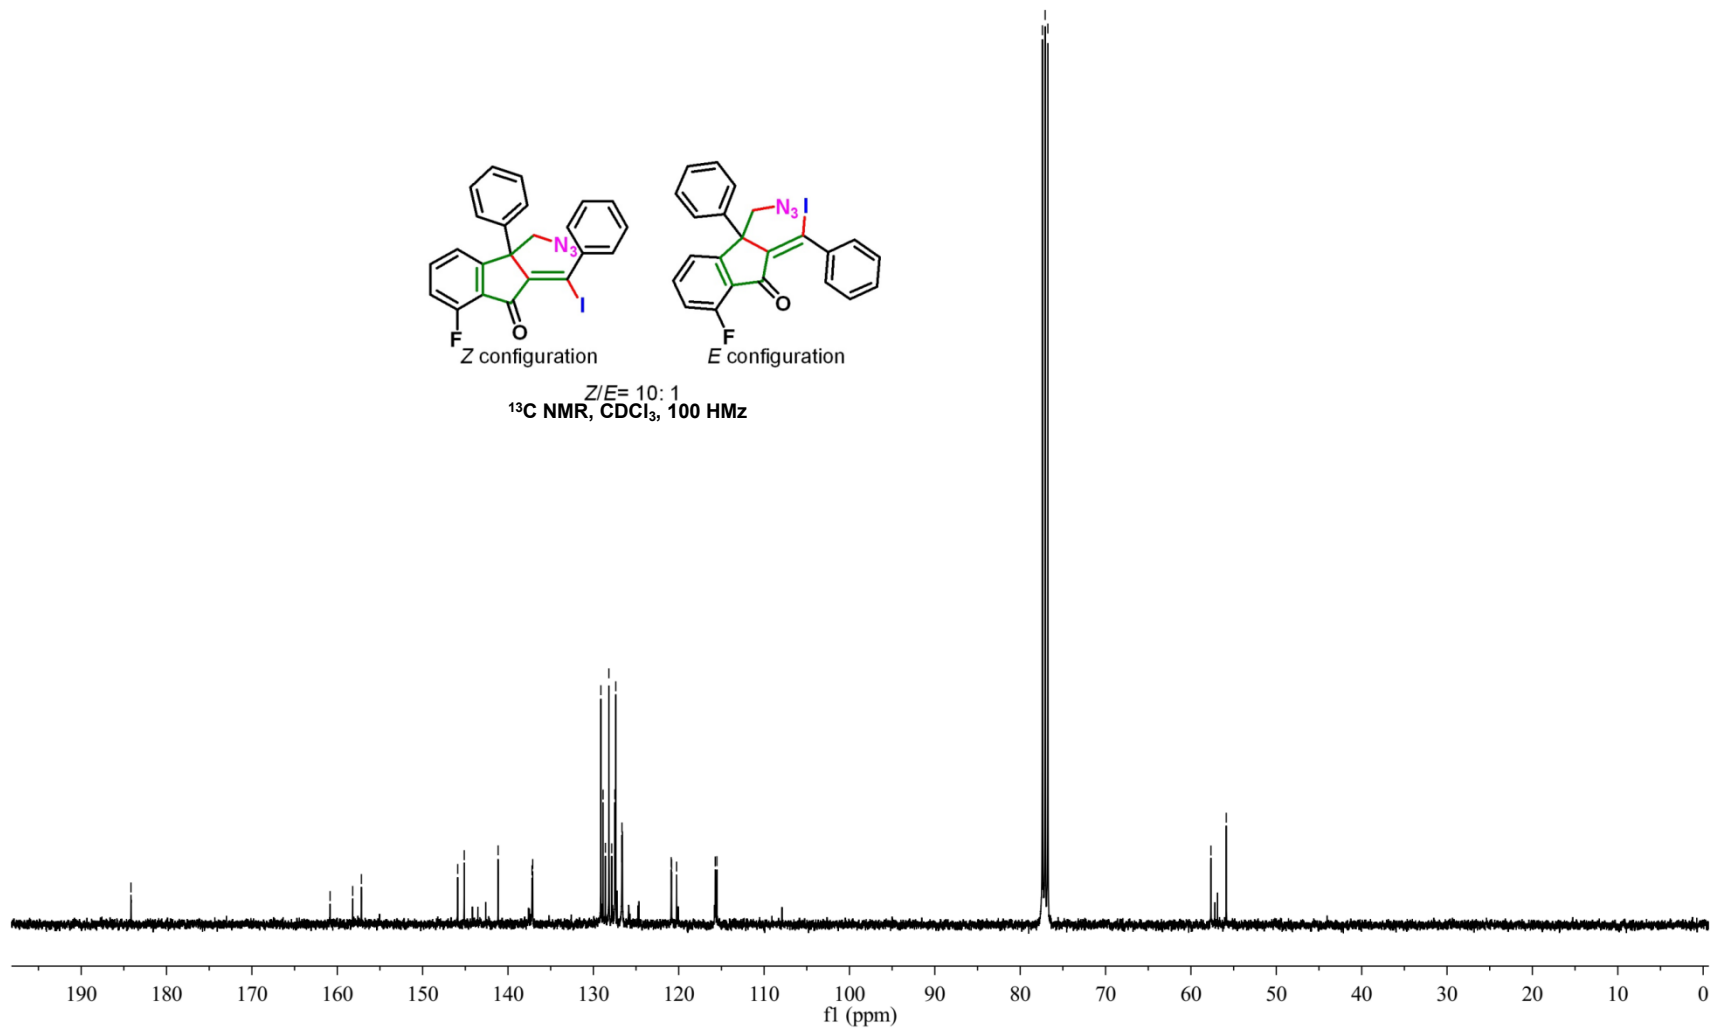

<sup>13</sup>C NMR Spectrum of Compound 6k

3maxiaoming  
yhf28

-114.544  
-114.600

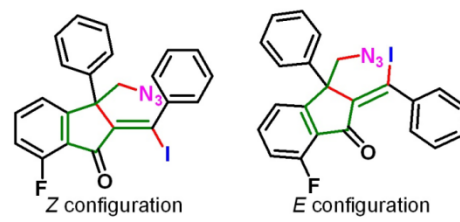

Z/E= 10: 1

<sup>19</sup>F NMR, CDCl<sub>3</sub>, 282 HMz

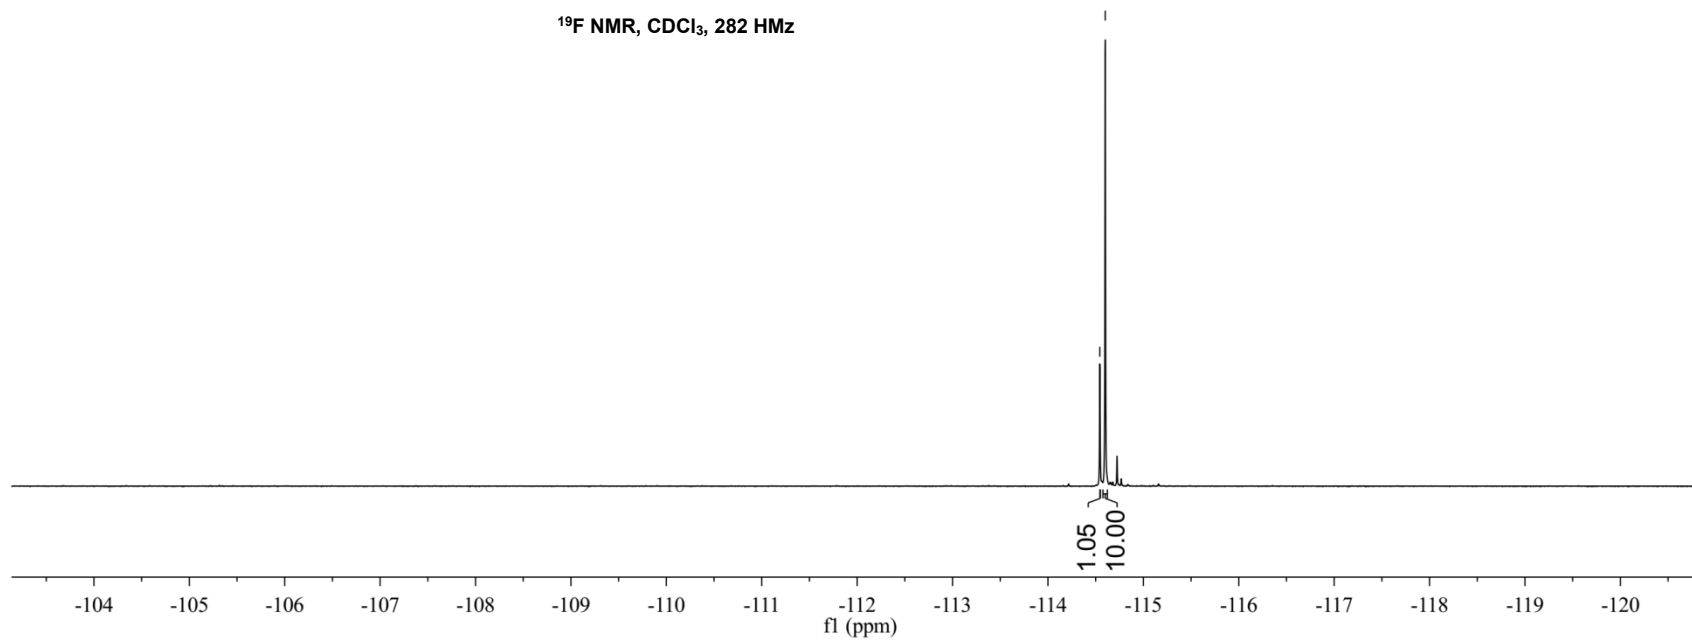

<sup>19</sup>F NMR Spectrum of Compound 6k

maxiaomin12  
yhf-1

7.769  
7.750  
7.670  
7.653  
7.635  
7.483  
7.463  
7.453  
7.434  
7.416  
7.399  
7.371  
7.354  
7.341  
7.323  
7.290  
7.273  
7.259  
7.249  
7.230

3.585  
3.554  
3.373  
3.342

1.356

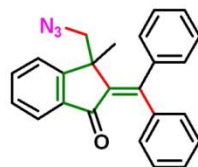

<sup>1</sup>H NMR, CDCl<sub>3</sub>, 400 HMz

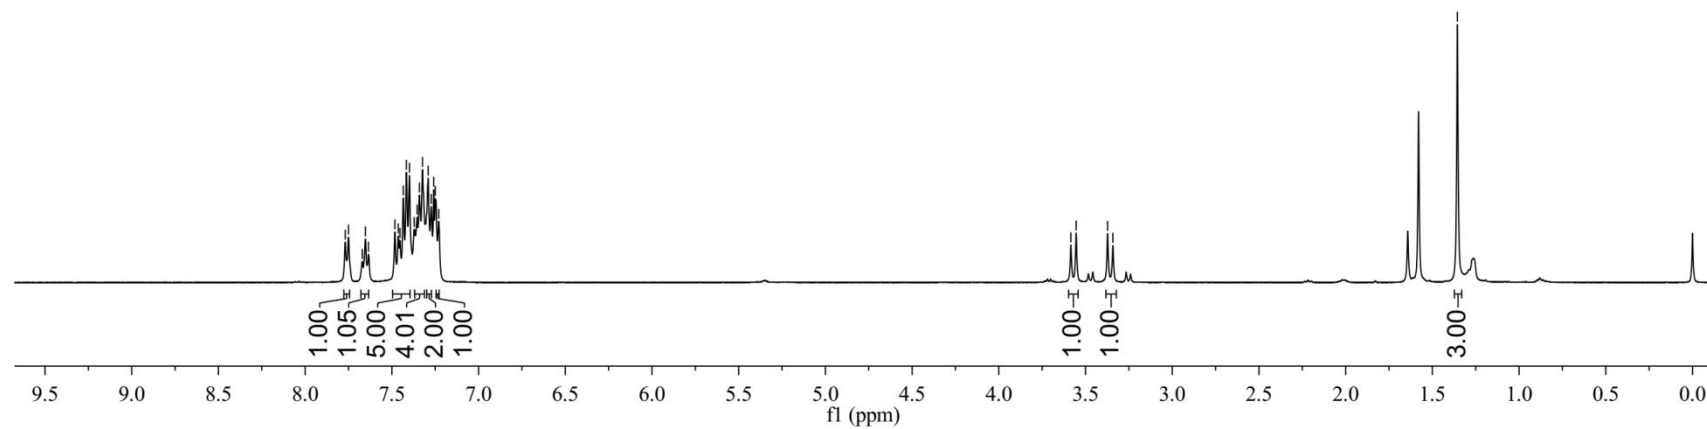

<sup>1</sup>H NMR Spectrum of Compound 7

maxiaoming13  
YHF 1

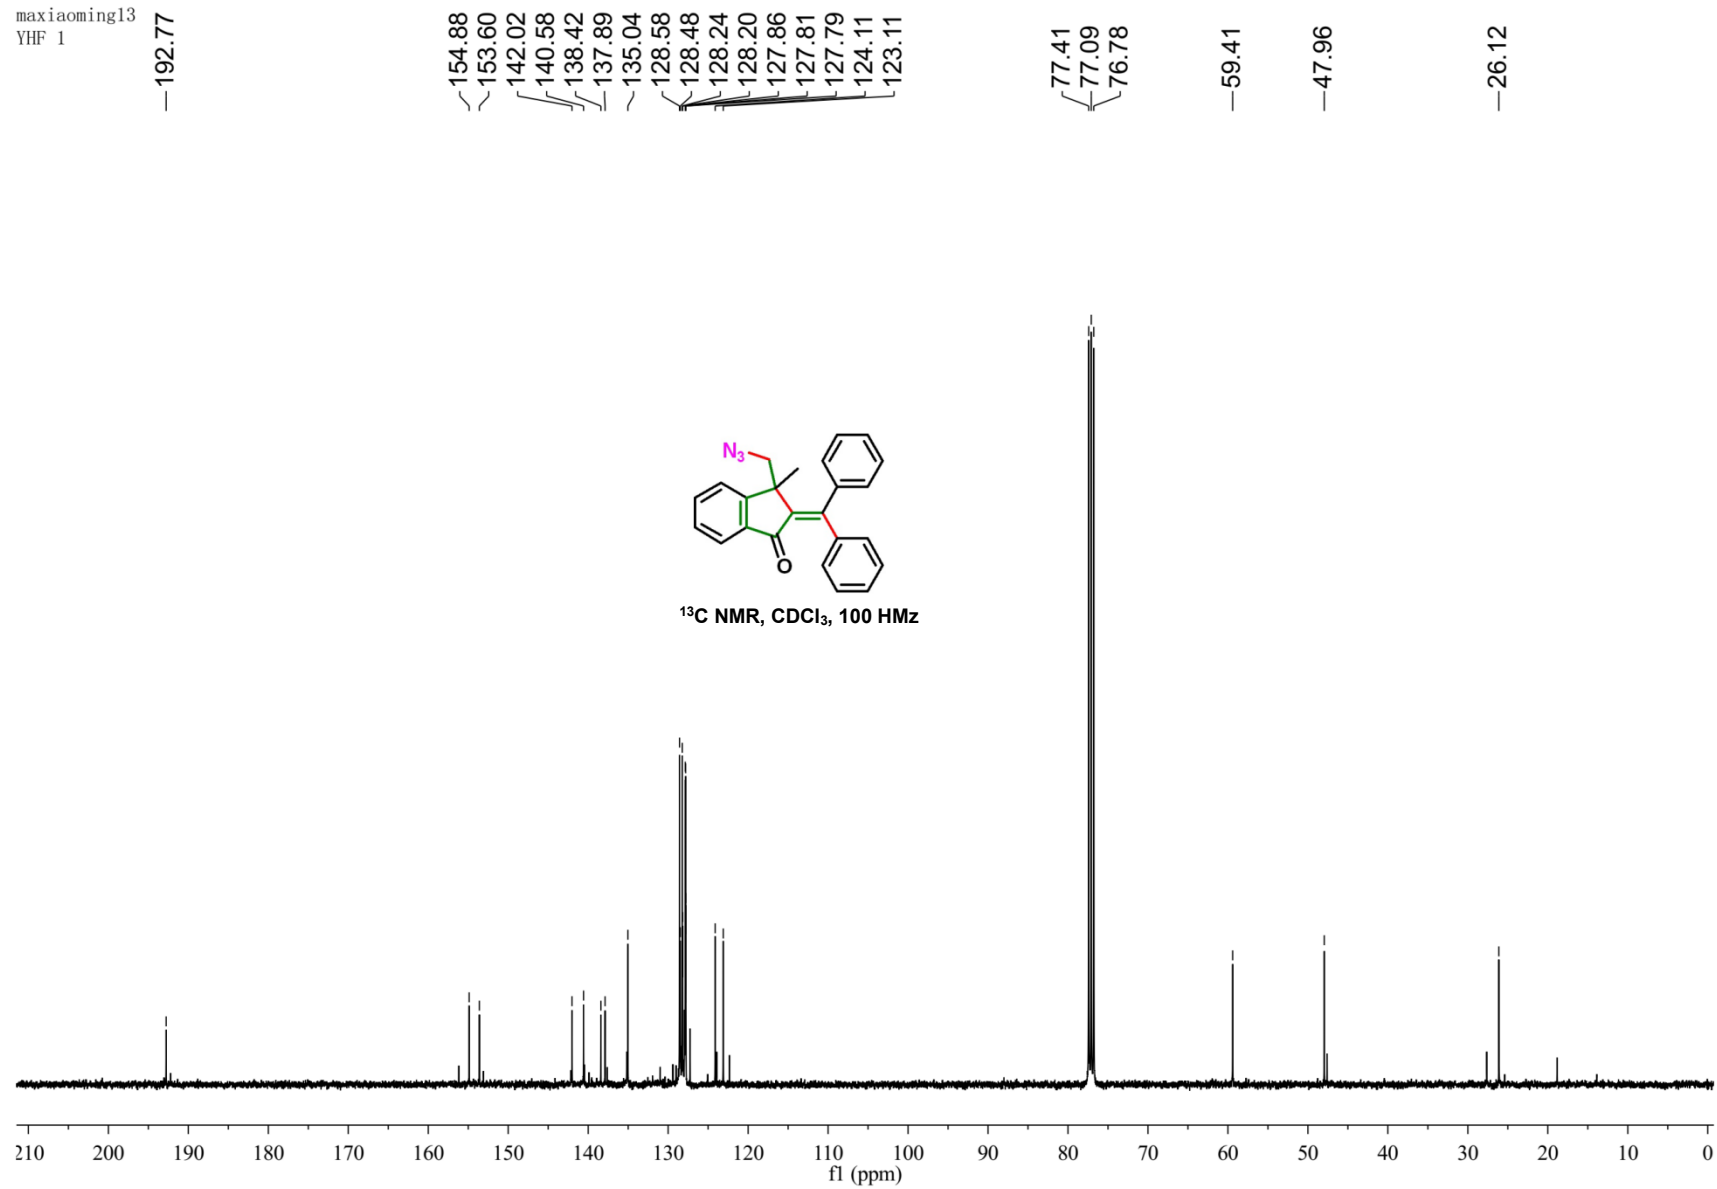

<sup>13</sup>C NMR Spectrum of Compound 7
